# Supplementary material for: Amplicon-Based Microbiome Profiling: From Second- to Third-Generation Sequencing for Higher Taxonomic Resolution
Source: MDPI journal article supplement (doi:10.3390/genes14081567), 2023-07-31
Supplement: s1 [file s1]

**Supplementary Table S6. Differential abundance analysis of the microbiome, using ANCOM-BC.** Statistically significant differences are considered for log fold change (lfc) > |1| and adjusted p-value (q\_val) < 0.05. “Comparison” shows the sequencing approaches of the pairwise comparison for each assigned taxon.

| Comparison          | Rank level | Assigned taxa                       | lfc   | q_val      |
|---------------------|------------|-------------------------------------|-------|------------|
| V3V4 vs Full-length | Phylum     | Firmicutes                          | -0.36 | 0.00882802 |
| V3V4 vs Full-length | Phylum     | Patescibacteria                     | -0.10 | 0.81988243 |
| V3V4 vs Full-length | Phylum     | Bacteroidota                        | 0.00  | 0.98865745 |
| V3V4 vs Full-length | Phylum     | Proteobacteria                      | -0.02 | 0.98865745 |
| V3V4 vs Full-length | Phylum     | Verrucomicrobiota                   | -0.83 | 0.00437336 |
| V3V4 vs Full-length | Phylum     | Actinobacteriota                    | 0.30  | 0.31606409 |
| V3V4 vs Full-length | Phylum     | Cyanobacteria                       | -0.37 | 0.06081124 |
| V3V4 vs Full-length | Phylum     | Deferribacterota                    | -0.33 | 0.334398   |
| V3V4 vs Full-length | Phylum     | Desulfobacterota                    | 0.64  | 0.00550924 |
| V3V4 vs Full-length | Class      | Clostridia                          | 0.15  | 0.71635862 |
| V3V4 vs Full-length | Class      | Bacilli                             | -0.76 | 0.00586132 |
| V3V4 vs Full-length | Class      | Saccharimonadia                     | -0.09 | 0.84624623 |
| V3V4 vs Full-length | Class      | Bacteroidia                         | 0.00  | 0.97562163 |
| V3V4 vs Full-length | Class      | Alphaproteobacteria                 | -0.15 | 0.79416237 |
| V3V4 vs Full-length | Class      | Gammaproteobacteria                 | 0.02  | 0.97562163 |
| V3V4 vs Full-length | Class      | Verrucomicrobiae                    | -0.83 | 0.01143652 |
| V3V4 vs Full-length | Class      | Actinobacteria                      | -0.19 | 0.79416237 |
| V3V4 vs Full-length | Class      | Coriobacteriia                      | 1.62  | 6.06E-12   |
| V3V4 vs Full-length | Class      | Vampirivibrionia                    | -0.37 | 0.19391492 |
| V3V4 vs Full-length | Class      | Deferribacteres                     | -0.33 | 0.61716614 |
| V3V4 vs Full-length | Class      | Desulfovibrionia                    | 0.64  | 0.03097129 |
| V3V4 vs Full-length | Order      | Peptostreptococcales-Tissierellales | 0.26  | 0.19806938 |
| V3V4 vs Full-length | Order      | RF39                                | -0.99 | 4.10E-05   |
| V3V4 vs Full-length | Order      | Lactobacillales                     | -0.51 | 0.0674528  |
| V3V4 vs Full-length | Order      | Erysipelotrichales                  | -0.66 | 0.12157119 |

|                     |        |                            |       |            |
|---------------------|--------|----------------------------|-------|------------|
| V3V4 vs Full-length | Order  | Acholeplasmatales          | -2.05 | 1.62E-09   |
| V3V4 vs Full-length | Order  | Saccharimonadales          | -0.01 | 0.98980072 |
| V3V4 vs Full-length | Order  | Bacteroidales              | 0.09  | 0.73706211 |
| V3V4 vs Full-length | Order  | Christensenellales         | -1.74 | 0          |
| V3V4 vs Full-length | Order  | Clostridia_vadinBB60_group | 0.28  | 0.26669589 |
| V3V4 vs Full-length | Order  | Rhodospirillales           | -0.07 | 0.91981644 |
| V3V4 vs Full-length | Order  | Clostridiales              | -2.33 | 2.51E-21   |
| V3V4 vs Full-length | Order  | Burkholderiales            | 0.12  | 0.73706211 |
| V3V4 vs Full-length | Order  | Verrucomicrobiales         | -0.75 | 0.02883061 |
| V3V4 vs Full-length | Order  | Oscillospirales            | 0.31  | 0.12157119 |
| V3V4 vs Full-length | Order  | Bifidobacteriales          | -0.09 | 0.91981644 |
| V3V4 vs Full-length | Order  | Coriobacteriales           | 1.70  | 1.22E-11   |
| V3V4 vs Full-length | Order  | Gastranaerophilales        | -0.29 | 0.2804299  |
| V3V4 vs Full-length | Order  | Deferribacterales          | -0.25 | 0.64089342 |
| V3V4 vs Full-length | Order  | Enterobacterales           | -1.46 | 0.01240503 |
| V3V4 vs Full-length | Order  | Desulfovibrionales         | 0.72  | 0.00978741 |
| V3V4 vs Full-length | Order  | Eubacteriales              | -2.01 | 0          |
| V3V4 vs Full-length | Order  | Peptococcales              | -0.01 | 0.98980072 |
| V3V4 vs Full-length | Order  | Monoglobales               | -0.18 | 0.76912913 |
| V3V4 vs Full-length | Order  | Clostridia_UCG-014         | 0.00  | 0.98980072 |
| V3V4 vs Full-length | Order  | Lachnospirales             | 0.28  | 0.2140446  |
| V3V4 vs Full-length | Family | Anaerovoracaceae           | 0.13  | 0.37917324 |
| V3V4 vs Full-length | Family | RF39                       | -1.12 | 8.12E-11   |
| V3V4 vs Full-length | Family | Streptococcaceae           | 0.00  | 0.99898135 |
| V3V4 vs Full-length | Family | Lactobacillaceae           | -0.64 | 0.00086129 |
| V3V4 vs Full-length | Family | Erysipelatoclostridiaceae  | 0.11  | 0.74559684 |
| V3V4 vs Full-length | Family | Erysipelotrichaceae        | -0.93 | 0.02174458 |
| V3V4 vs Full-length | Family | Acholeplasmataceae         | -2.18 | 1.90E-14   |
| V3V4 vs Full-length | Family | Saccharimonadaceae         | -0.14 | 0.63113285 |

---

|                     |        |                                       |       |            |
|---------------------|--------|---------------------------------------|-------|------------|
| V3V4 vs Full-length | Family | Prevotellaceae                        | -0.82 | 0.07533366 |
| V3V4 vs Full-length | Family | Marinifilaceae                        | -0.06 | 0.68513029 |
| V3V4 vs Full-length | Family | Rikenellaceae                         | 0.04  | 0.72627147 |
| V3V4 vs Full-length | Family | Muribaculaceae                        | -0.03 | 0.75393095 |
| V3V4 vs Full-length | Family | Bacteroidaceae                        | -0.05 | 0.73409521 |
| V3V4 vs Full-length | Family | Christensenellaceae                   | -1.87 | 0          |
| V3V4 vs Full-length | Family | Clostridia_vadinBB60_group            | 0.15  | 0.50422398 |
| V3V4 vs Full-length | Family | Clostridiaceae                        | -2.46 | 2.63E-40   |
| V3V4 vs Full-length | Family | Sutterellaceae                        | -0.01 | 0.98068821 |
| V3V4 vs Full-length | Family | Akkermansiaceae                       | -0.88 | 0.00068284 |
| V3V4 vs Full-length | Family | Bacteroidales                         | -1.17 | 0          |
| V3V4 vs Full-length | Family | UCG-010                               | -0.29 | 0.17889018 |
| V3V4 vs Full-length | Family | Bifidobacteriaceae                    | -0.22 | 0.63113285 |
| V3V4 vs Full-length | Family | Atopobiaceae                          | 0.91  | 0.00263392 |
| V3V4 vs Full-length | Family | Eggerthellaceae                       | 2.03  | 3.63E-40   |
| V3V4 vs Full-length | Family | Gastranaerophilales                   | -0.42 | 0.02174458 |
| V3V4 vs Full-length | Family | Deferribacteraceae                    | -0.38 | 0.29997227 |
| V3V4 vs Full-length | Family | Enterobacteriaceae                    | -1.59 | 0.00167461 |
| V3V4 vs Full-length | Family | Desulfovibrionaceae                   | 0.59  | 0.00617791 |
| V3V4 vs Full-length | Family | Anaerofustaceae                       | -2.14 | 0          |
| V3V4 vs Full-length | Family | Peptococcaceae                        | -0.14 | 0.54037102 |
| V3V4 vs Full-length | Family | Butyricoccaceae                       | 0.82  | 0.0001502  |
| V3V4 vs Full-length | Family | [Eubacterium]_coprostanoligenes_group | -0.73 | 0.02473347 |
| V3V4 vs Full-length | Family | Ruminococcaceae                       | 0.10  | 0.54037102 |
| V3V4 vs Full-length | Family | Oscillospiraceae                      | 0.42  | 0.02509794 |
| V3V4 vs Full-length | Family | Monoglobaceae                         | -0.31 | 0.50422398 |
| V3V4 vs Full-length | Family | Clostridia_UCG-014                    | -0.13 | 0.58865687 |
| V3V4 vs Full-length | Family | Lachnospiraceae                       | 0.15  | 0.44296687 |
| V3V4 vs Full-length | Family | Defluviitaleaceae                     | 0.01  | 0.98068821 |

---

|                     |        |                             |       |            |
|---------------------|--------|-----------------------------|-------|------------|
| V3V4 vs Full-length | Family | Tannerellaceae              | -3.84 | 0          |
| V3V4 vs Full-length | Genus  | Anaerovorax                 | -1.16 | 6.31E-08   |
| V3V4 vs Full-length | Genus  | Family_XIII_AD3011_group    | -1.11 | 3.93E-05   |
| V3V4 vs Full-length | Genus  | [Eubacterium]_nodatum_group | 0.04  | 0.90766349 |
| V3V4 vs Full-length | Genus  | [Eubacterium]_brachy_group  | -0.20 | 0.44615202 |
| V3V4 vs Full-length | Genus  | Family_XIII_UCG-001         | -0.33 | 0.22959991 |
| V3V4 vs Full-length | Genus  | RF39                        | -1.11 | 1.99E-09   |
| V3V4 vs Full-length | Genus  | Streptococcus               | 0.02  | 0.97374242 |
| V3V4 vs Full-length | Genus  | Lactobacillus               | -0.62 | 0.0028288  |
| V3V4 vs Full-length | Genus  | Erysipelatoclostridium      | -0.20 | 0.62946504 |
| V3V4 vs Full-length | Genus  | Faecalibaculum              | -1.18 | 0.0159903  |
| V3V4 vs Full-length | Genus  | Anaeroplasma                | -2.16 | 1.47E-14   |
| V3V4 vs Full-length | Genus  | Prevotellaceae_UCG-001      | -0.80 | 0.09244068 |
| V3V4 vs Full-length | Genus  | Odoribacter                 | -0.05 | 0.80986787 |
| V3V4 vs Full-length | Genus  | Rikenellaceae_RC9_gut_group | -0.36 | 0.25679689 |
| V3V4 vs Full-length | Genus  | Alistipes                   | 0.08  | 0.43474886 |
| V3V4 vs Full-length | Genus  | Muribaculaceae              | -0.02 | 0.91796392 |
| V3V4 vs Full-length | Genus  | Muribaculum                 | 0.19  | 0.27499928 |
| V3V4 vs Full-length | Genus  | Bacteroides                 | -0.03 | 0.91796392 |
| V3V4 vs Full-length | Genus  | Clostridia_vadinBB60_group  | 0.16  | 0.34822098 |
| V3V4 vs Full-length | Genus  | Parasutterella              | 0.01  | 0.97374242 |
| V3V4 vs Full-length | Genus  | Akkermansia                 | -0.86 | 0.00176479 |
| V3V4 vs Full-length | Genus  | Bacteroidales               | -1.15 | 0          |
| V3V4 vs Full-length | Genus  | UCG-010                     | -0.27 | 0.24593715 |
| V3V4 vs Full-length | Genus  | Bifidobacterium             | -0.20 | 0.68401918 |
| V3V4 vs Full-length | Genus  | Coriobacteriaceae_UCG-002   | 2.48  | 0          |
| V3V4 vs Full-length | Genus  | Enterorhabdus               | 2.04  | 3.75E-39   |
| V3V4 vs Full-length | Genus  | Gastranaerophilales         | -0.40 | 0.02240791 |
| V3V4 vs Full-length | Genus  | Mucispirillum               | -0.36 | 0.24593715 |

---

|                     |       |                                       |       |            |
|---------------------|-------|---------------------------------------|-------|------------|
| V3V4 vs Full-length | Genus | Salmonella                            | -1.59 | 0.00123087 |
| V3V4 vs Full-length | Genus | Bilophila                             | 0.61  | 0.00098695 |
| V3V4 vs Full-length | Genus | Anaerofustis                          | -2.12 | 0          |
| V3V4 vs Full-length | Genus | Peptococcus                           | -0.66 | 0.00907555 |
| V3V4 vs Full-length | Genus | UCG-009                               | 0.65  | 0.0006191  |
| V3V4 vs Full-length | Genus | Butyricicoccus                        | 0.76  | 0.00201117 |
| V3V4 vs Full-length | Genus | [Eubacterium]_coprostanoligenes_group | -0.71 | 0.03625896 |
| V3V4 vs Full-length | Genus | Harryflintia                          | -1.28 | 1.06E-07   |
| V3V4 vs Full-length | Genus | Negativibacillus                      | -2.41 | 2.45E-30   |
| V3V4 vs Full-length | Genus | Paludicola                            | -1.67 | 3.21E-16   |
| V3V4 vs Full-length | Genus | Anaerotruncus                         | 0.54  | 0.02482389 |
| V3V4 vs Full-length | Genus | [Eubacterium]_siraeum_group           | -0.79 | 0.02888684 |
| V3V4 vs Full-length | Genus | Ruminococcaceae                       | -1.99 | 1.28E-24   |
| V3V4 vs Full-length | Genus | Ruminococcus                          | 0.01  | 0.97374242 |
| V3V4 vs Full-length | Genus | UCG-005                               | -1.70 | 6.71E-10   |
| V3V4 vs Full-length | Genus | Oscillibacter                         | -0.12 | 0.72195842 |
| V3V4 vs Full-length | Genus | NK4A214_group                         | -0.47 | 0.07105933 |
| V3V4 vs Full-length | Genus | Colidextribacter                      | 1.02  | 2.83E-10   |
| V3V4 vs Full-length | Genus | Intestinimonas                        | 0.02  | 0          |
| V3V4 vs Full-length | Genus | Monoglobus                            | -0.29 | 0.46235088 |
| V3V4 vs Full-length | Genus | Clostridia_UCG-014                    | -0.11 | 0.66628968 |
| V3V4 vs Full-length | Genus | Tyzzarella                            | -0.94 | 6.87E-05   |
| V3V4 vs Full-length | Genus | Defluviitaleaceae_UCG-011             | 0.03  | 0.95483939 |
| V3V4 vs Full-length | Genus | Lachnospiraceae_UCG-010               | -1.95 | 8.28E-26   |
| V3V4 vs Full-length | Genus | ASF356                                | 0.32  | 0.18922993 |
| V3V4 vs Full-length | Genus | Tuzzerella                            | 0.37  | 0.15592945 |
| V3V4 vs Full-length | Genus | GCA-900066575                         | 1.06  | 2.51E-08   |
| V3V4 vs Full-length | Genus | Lachnospiraceae                       | 0.97  | 1.84E-13   |
| V3V4 vs Full-length | Genus | Lachnospiraceae_FCS020_group          | 0.91  | 0.00172751 |

---

|                     |         |                                  |       |            |
|---------------------|---------|----------------------------------|-------|------------|
| V3V4 vs Full-length | Genus   | [Eubacterium]_xylanophilum_group | 0.15  | 0.51344532 |
| V3V4 vs Full-length | Genus   | Lachnospiraceae_NK4A136_group    | -0.08 | 0.62946504 |
| V3V4 vs Full-length | Genus   | [Eubacterium]_fissicatena_group  | -0.23 | 0.52953284 |
| V3V4 vs Full-length | Genus   | Acetatifactor                    | -2.07 | 5.09E-24   |
| V3V4 vs Full-length | Genus   | Blautia                          | 0.82  | 0.00196538 |
| V3V4 vs Full-length | Genus   | Marvinbryantia                   | -0.86 | 0.04295581 |
| V3V4 vs Full-length | Genus   | Lachnoclostridium                | 0.40  | 0.04351217 |
| V3V4 vs Full-length | Genus   | Lachnospiraceae_UCG-006          | -0.01 | 0.97648681 |
| V3V4 vs Full-length | Genus   | Roseburia                        | 0.33  | 0.24593715 |
| V3V4 vs Full-length | Genus   | A2                               | -0.29 | 0.49267992 |
| V3V4 vs Full-length | Genus   | Lachnospiraceae_UCG-001          | 0.05  | 0.95483939 |
| V3V4 vs Full-length | Genus   | Olsenella                        | -4.21 | 0          |
| V3V4 vs Full-length | Genus   | Parabacteroides                  | -3.82 | 0          |
| V3V4 vs Full-length | Species | Streptococcus_danieliae          | 0.80  | 0.00040229 |
| V3V4 vs Full-length | Species | Lactobacillus_murinus            | 0.77  | 7.46E-05   |
| V3V4 vs Full-length | Species | Lactobacillus_reuteri            | 0.35  | 0.30456009 |
| V3V4 vs Full-length | Species | Bacteroides_acidifaciens         | 1.37  | 3.02E-16   |
| V3V4 vs Full-length | Species | Bacteroides_caecimuris           | 0.01  | 0.98168479 |
| V3V4 vs Full-length | Species | Bifidobacterium_choerinum        | 5.37  | 0          |
| V3V4 vs Full-length | Species | Adlercreutzia_mucosicola         | 1.34  | 9.62E-06   |
| V3V4 vs Full-length | Species | Akkermansia_muciniphila          | -0.08 | 0.78618179 |
| V3V4 vs Full-length | Species | [Clostridium]_leptum             | 1.30  | 2.65E-13   |
| V3V4 vs Full-length | Species | Eubacterium_plexicaudatum        | -2.41 | 0          |
| V3V4 vs Full-length | Species | Muribaculum_intestinale          | -5.41 | 0          |
| V3V4 vs Full-length | Species | Mucispirillum_schaedleri         | -4.53 | 0          |
| V3V4 vs Full-length | Species | Lactobacillus_johnsonii          | -8.22 | 0          |
| V3V4 vs Full-length | Species | Bifidobacterium_pseudolongum     | -6.68 | 0          |
| V3V4 vs Full-length | Species | [Clostridium]_leptum_3           | -3.87 | 0          |
| V3V4 vs Full-length | Species | Parabacteroides_goldsteinii      | -3.04 | 0          |

---

|                   |        |                                     |       |            |
|-------------------|--------|-------------------------------------|-------|------------|
| V3V4 vs Multiplex | Phylum | Firmicutes                          | 0.00  | 0.98       |
| V3V4 vs Multiplex | Phylum | Patescibacteria                     | 2.34  | 0.00       |
| V3V4 vs Multiplex | Phylum | Bacteroidota                        | 0.78  | 0.00       |
| V3V4 vs Multiplex | Phylum | Proteobacteria                      | -1.25 | 0.00       |
| V3V4 vs Multiplex | Phylum | Verrucomicrobiota                   | 1.07  | 0.00       |
| V3V4 vs Multiplex | Phylum | Actinobacteriota                    | -0.60 | 0.01       |
| V3V4 vs Multiplex | Phylum | Cyanobacteria                       | 4.49  | 0.00       |
| V3V4 vs Multiplex | Phylum | Deferribacterota                    | 0.05  | 0.98       |
| V3V4 vs Multiplex | Phylum | Desulfobacterota                    | 4.76  | 0.00       |
| V3V4 vs Multiplex | Class  | Clostridia                          | -0.32 | 0.08423645 |
| V3V4 vs Multiplex | Class  | Bacilli                             | 0.58  | 0.01881771 |
| V3V4 vs Multiplex | Class  | Saccharimonadia                     | 2.15  | 0          |
| V3V4 vs Multiplex | Class  | Bacteroidia                         | 0.59  | 9.81E-06   |
| V3V4 vs Multiplex | Class  | Alphaproteobacteria                 | -3.22 | 4.98E-49   |
| V3V4 vs Multiplex | Class  | Gammaproteobacteria                 | 0.03  | 0.87328174 |
| V3V4 vs Multiplex | Class  | Verrucomicrobiae                    | 0.88  | 0.00324566 |
| V3V4 vs Multiplex | Class  | Actinobacteria                      | -0.73 | 0.0678394  |
| V3V4 vs Multiplex | Class  | Coriobacteriia                      | -1.12 | 1.31E-11   |
| V3V4 vs Multiplex | Class  | Vampirivibrionia                    | 4.30  | 0          |
| V3V4 vs Multiplex | Class  | Deferribacteres                     | -0.15 | 0.69713075 |
| V3V4 vs Multiplex | Class  | Desulfovibrionia                    | 4.57  | 0          |
| V3V4 vs Multiplex | Order  | Peptostreptococcales-Tissierellales | -4.99 | 3.40E-249  |
| V3V4 vs Multiplex | Order  | RF39                                | 2.97  | 6.90E-42   |
| V3V4 vs Multiplex | Order  | Staphylococcales                    | -1.03 | 1.59E-05   |
| V3V4 vs Multiplex | Order  | Lactobacillales                     | 4.85  | 2.23E-85   |
| V3V4 vs Multiplex | Order  | Erysipelotrichales                  | 4.18  | 2.47E-51   |
| V3V4 vs Multiplex | Order  | Acholeplasmatales                   | 0.37  | 0          |
| V3V4 vs Multiplex | Order  | Saccharimonadales                   | 2.02  | 0          |
| V3V4 vs Multiplex | Order  | Bacteroidales                       | 0.62  | 2.48E-06   |

|                   |        |                            |       |            |
|-------------------|--------|----------------------------|-------|------------|
| V3V4 vs Multiplex | Order  | Christensenellales         | 0.25  | 0          |
| V3V4 vs Multiplex | Order  | Clostridia_vadinBB60_group | 5.10  | 0          |
| V3V4 vs Multiplex | Order  | Rhodospirillales           | 0.98  | 0.00011844 |
| V3V4 vs Multiplex | Order  | Burkholderiales            | -0.03 | 0.88563593 |
| V3V4 vs Multiplex | Order  | Verrucomicrobiales         | 0.76  | 0.01290805 |
| V3V4 vs Multiplex | Order  | Oscillospirales            | 2.15  | 1.54E-28   |
| V3V4 vs Multiplex | Order  | Propionibacteriales        | -0.81 | 0          |
| V3V4 vs Multiplex | Order  | Bifidobacteriales          | -0.84 | 0.04490772 |
| V3V4 vs Multiplex | Order  | Coriobacteriales           | -1.24 | 2.70E-12   |
| V3V4 vs Multiplex | Order  | Gastranaerophilales        | 4.18  | 0          |
| V3V4 vs Multiplex | Order  | Deferribacterales          | -0.27 | 0.41752508 |
| V3V4 vs Multiplex | Order  | Enterobacterales           | -1.05 | 0.07619272 |
| V3V4 vs Multiplex | Order  | Desulfovibrionales         | 4.45  | 0          |
| V3V4 vs Multiplex | Order  | Eubacteriales              | -0.03 | 0          |
| V3V4 vs Multiplex | Order  | Peptococcales              | 4.33  | 0          |
| V3V4 vs Multiplex | Order  | Monoglobales               | 3.56  | 0          |
| V3V4 vs Multiplex | Order  | Clostridia_UCG-014         | 7.09  | 0          |
| V3V4 vs Multiplex | Order  | Lachnospirales             | 6.20  | 9.82E-240  |
| V3V4 vs Multiplex | Order  | Bacillales                 | -9.09 | 0          |
| V3V4 vs Multiplex | Order  | Sphingomonadales           | -4.50 | 0          |
| V3V4 vs Multiplex | Order  | Caulobacteriales           | -9.10 | 0          |
| V3V4 vs Multiplex | Family | Anaerovoracaceae           | 4.70  | 0          |
| V3V4 vs Multiplex | Family | RF39                       | 2.53  | 5.36E-16   |
| V3V4 vs Multiplex | Family | Staphylococcaceae          | -1.48 | 8.21E-06   |
| V3V4 vs Multiplex | Family | Streptococcaceae           | 2.02  | 3.83E-10   |
| V3V4 vs Multiplex | Family | Lactobacillaceae           | 4.41  | 5.90E-38   |
| V3V4 vs Multiplex | Family | Erysipelatoclostridiaceae  | 4.50  | 0          |
| V3V4 vs Multiplex | Family | Erysipelotrichaceae        | 3.02  | 8.90E-14   |
| V3V4 vs Multiplex | Family | Acholeplasmataceae         | -0.08 | 0          |

---



|                   |        |                                       |       |            |
|-------------------|--------|---------------------------------------|-------|------------|
| V3V4 vs Multiplex | Family | Saccharimonadaceae                    | 1.58  | 0          |
| V3V4 vs Multiplex | Family | Prevotellaceae                        | 3.48  | 2.76E-14   |
| V3V4 vs Multiplex | Family | Marinifilaceae                        | 0.62  | 0.11272383 |
| V3V4 vs Multiplex | Family | Rikenellaceae                         | 0.01  | 0.96502105 |
| V3V4 vs Multiplex | Family | Muribaculaceae                        | 0.65  | 0.00750378 |
| V3V4 vs Multiplex | Family | Bacteroidaceae                        | -0.38 | 0.12258149 |
| V3V4 vs Multiplex | Family | Christensenellaceae                   | -0.19 | 0          |
| V3V4 vs Multiplex | Family | Clostridia_vadinBB60_group            | 4.65  | 0          |
| V3V4 vs Multiplex | Family | uncultured                            | 0.54  | 0.12258149 |
| V3V4 vs Multiplex | Family | Sutterellaceae                        | 4.34  | 3.71E-53   |
| V3V4 vs Multiplex | Family | Akkermansiaceae                       | 0.31  | 0.44425701 |
| V3V4 vs Multiplex | Family | UCG-010                               | 3.72  | 0          |
| V3V4 vs Multiplex | Family | Propionibacteriaceae                  | -1.26 | 0          |
| V3V4 vs Multiplex | Family | Bifidobacteriaceae                    | -1.28 | 0.01200406 |
| V3V4 vs Multiplex | Family | Atopobiaceae                          | -2.39 | 8.52E-10   |
| V3V4 vs Multiplex | Family | Eggerthellaceae                       | -0.84 | 0.00165684 |
| V3V4 vs Multiplex | Family | Gastranaerophilales                   | 3.73  | 0          |
| V3V4 vs Multiplex | Family | Deferribacteraceae                    | -0.71 | 0.09857396 |
| V3V4 vs Multiplex | Family | Enterobacteriaceae                    | 1.42  | 0.01117172 |
| V3V4 vs Multiplex | Family | Desulfovibrionaceae                   | 4.00  | 0          |
| V3V4 vs Multiplex | Family | Anaerofustaceae                       | -0.47 | 0          |
| V3V4 vs Multiplex | Family | Peptococcaceae                        | 3.89  | 0          |
| V3V4 vs Multiplex | Family | Butyricicoccaceae                     | 4.83  | 1.33E-73   |
| V3V4 vs Multiplex | Family | [Eubacterium]_coprostanoligenes_group | 2.64  | 0          |
| V3V4 vs Multiplex | Family | Ruminococcaceae                       | 3.59  | 6.76E-31   |
| V3V4 vs Multiplex | Family | Oscillospiraceae                      | 0.53  | 0.09990978 |
| V3V4 vs Multiplex | Family | Monoglobaceae                         | 3.11  | 0          |
| V3V4 vs Multiplex | Family | Clostridia_UCG-014                    | 6.65  | 0          |
| V3V4 vs Multiplex | Family | Lachnospiraceae                       | 5.75  | 4.32E-92   |

---

|                   |        |                             |        |            |
|-------------------|--------|-----------------------------|--------|------------|
| V3V4 vs Multiplex | Family | Defluviitaleaceae           | 3.48   | 0          |
| V3V4 vs Multiplex | Family | Peptostreptococcaceae       | -11.17 | 0          |
| V3V4 vs Multiplex | Family | Bacillaceae                 | -9.54  | 0          |
| V3V4 vs Multiplex | Family | Tannerellaceae              | -4.28  | 0          |
| V3V4 vs Multiplex | Family | Sphingomonadaceae           | -4.95  | 0          |
| V3V4 vs Multiplex | Family | Alcaligenaceae              | -8.21  | 0          |
| V3V4 vs Multiplex | Family | Yersiniaceae                | -4.20  | 0          |
| V3V4 vs Multiplex | Family | Barnesiellaceae             | -1.56  | 0          |
| V3V4 vs Multiplex | Family | Parvularculaceae            | -9.55  | 0          |
| V3V4 vs Multiplex | Genus  | Anaerovorax                 | 0.14   | 0          |
| V3V4 vs Multiplex | Genus  | Family_XIII_AD3011_group    | 0.41   | 0          |
| V3V4 vs Multiplex | Genus  | [Eubacterium]_nodatum_group | 3.33   | 0          |
| V3V4 vs Multiplex | Genus  | [Eubacterium]_brachy_group  | 1.86   | 0          |
| V3V4 vs Multiplex | Genus  | Family_XIII_UCG-001         | 1.00   | 0          |
| V3V4 vs Multiplex | Genus  | RF39                        | 1.80   | 4.84E-09   |
| V3V4 vs Multiplex | Genus  | Staphylococcus              | -2.20  | 6.41E-12   |
| V3V4 vs Multiplex | Genus  | Streptococcus               | 1.29   | 5.42E-05   |
| V3V4 vs Multiplex | Genus  | Lactobacillus               | 3.68   | 7.87E-27   |
| V3V4 vs Multiplex | Genus  | Erysipelatoclostridium      | 2.31   | 0          |
| V3V4 vs Multiplex | Genus  | Faecalibaculum              | 4.52   | 0          |
| V3V4 vs Multiplex | Genus  | Anaeroplasma                | -0.80  | 0          |
| V3V4 vs Multiplex | Genus  | Prevotellaceae_UCG-001      | 3.49   | 0          |
| V3V4 vs Multiplex | Genus  | Odoribacter                 | -0.10  | 0.79513448 |
| V3V4 vs Multiplex | Genus  | Rikenellaceae_RC9_gut_group | -1.36  | 0.00051598 |
| V3V4 vs Multiplex | Genus  | Alistipes                   | -0.66  | 0.00280222 |
| V3V4 vs Multiplex | Genus  | Muribaculaceae              | 7.71   | 6.25E-185  |
| V3V4 vs Multiplex | Genus  | Muribaculum                 | -3.24  | 5.58E-36   |
| V3V4 vs Multiplex | Genus  | Bacteroides                 | -1.10  | 7.19E-06   |
| V3V4 vs Multiplex | Genus  | Clostridia_vadinBB60_group  | 3.93   | 0          |

---

|                   |       |                                       |       |            |
|-------------------|-------|---------------------------------------|-------|------------|
| V3V4 vs Multiplex | Genus | Parasutterella                        | 3.61  | 4.23E-36   |
| V3V4 vs Multiplex | Genus | Akkermansia                           | -0.41 | 0.30609411 |
| V3V4 vs Multiplex | Genus | UCG-010                               | 3.00  | 0          |
| V3V4 vs Multiplex | Genus | Bifidobacterium                       | -2.00 | 7.03E-05   |
| V3V4 vs Multiplex | Genus | Coriobacteriaceae_UCG-002             | 3.37  | 0          |
| V3V4 vs Multiplex | Genus | Enterorhabdus                         | -0.96 | 0.00015616 |
| V3V4 vs Multiplex | Genus | Gastranaerophilales                   | 3.01  | 0          |
| V3V4 vs Multiplex | Genus | Mucispirillum                         | -1.44 | 0.0003291  |
| V3V4 vs Multiplex | Genus | Salmonella                            | 0.93  | 0          |
| V3V4 vs Multiplex | Genus | Bilophila                             | 3.28  | 0          |
| V3V4 vs Multiplex | Genus | Anaerofustis                          | -1.20 | 0          |
| V3V4 vs Multiplex | Genus | Peptococcus                           | 0.87  | 0          |
| V3V4 vs Multiplex | Genus | UCG-009                               | 3.51  | 0          |
| V3V4 vs Multiplex | Genus | Butyricicoccus                        | 2.99  | 0          |
| V3V4 vs Multiplex | Genus | [Eubacterium]_coprostanoligenes_group | 1.91  | 0          |
| V3V4 vs Multiplex | Genus | Harryflintia                          | -0.03 | 0          |
| V3V4 vs Multiplex | Genus | Paludicola                            | -0.48 | 0          |
| V3V4 vs Multiplex | Genus | Anaerotruncus                         | 3.96  | 2.91E-48   |
| V3V4 vs Multiplex | Genus | [Eubacterium]_siraeum_group           | 1.14  | 0          |
| V3V4 vs Multiplex | Genus | Ruminococcaceae                       | -0.95 | 0          |
| V3V4 vs Multiplex | Genus | Ruminococcus                          | 5.44  | 4.50E-95   |
| V3V4 vs Multiplex | Genus | UCG-005                               | -0.12 | 0          |
| V3V4 vs Multiplex | Genus | Oscillibacter                         | -1.49 | 0.00010857 |
| V3V4 vs Multiplex | Genus | NK4A214_group                         | 0.81  | 0          |
| V3V4 vs Multiplex | Genus | Colidextribacter                      | 3.12  | 2.72E-26   |
| V3V4 vs Multiplex | Genus | Intestinimonas                        | 0.91  | 0          |
| V3V4 vs Multiplex | Genus | Monoglobus                            | 2.39  | 0          |
| V3V4 vs Multiplex | Genus | Clostridia_UCG-014                    | 5.92  | 0          |
| V3V4 vs Multiplex | Genus | Tyzzarella                            | 0.12  | 0          |

---

|                   |         |                                  |        |          |
|-------------------|---------|----------------------------------|--------|----------|
| V3V4 vs Multiplex | Genus   | Defluviitaleaceae_UCG-011        | 2.75   | 0        |
| V3V4 vs Multiplex | Genus   | Lachnospiraceae_UCG-010          | -0.96  | 0        |
| V3V4 vs Multiplex | Genus   | ASF356                           | 3.83   | 0        |
| V3V4 vs Multiplex | Genus   | Tuzzerella                       | 2.40   | 0        |
| V3V4 vs Multiplex | Genus   | GCA-900066575                    | 3.98   | 0        |
| V3V4 vs Multiplex | Genus   | Lachnospiraceae_FCS020_group     | 2.30   | 0        |
| V3V4 vs Multiplex | Genus   | [Eubacterium]_xylanophilum_group | 4.30   | 0        |
| V3V4 vs Multiplex | Genus   | Lachnospiraceae_NK4A136_group    | 6.79   | 0        |
| V3V4 vs Multiplex | Genus   | [Eubacterium]_fissicatena_group  | 4.38   | 0        |
| V3V4 vs Multiplex | Genus   | Acetatifactor                    | -2.47  | 5.44E-11 |
| V3V4 vs Multiplex | Genus   | Blautia                          | 3.09   | 7.84E-19 |
| V3V4 vs Multiplex | Genus   | Marvinbryantia                   | 1.08   | 0        |
| V3V4 vs Multiplex | Genus   | Lachnoclostridium                | 3.80   | 2.08E-39 |
| V3V4 vs Multiplex | Genus   | Lachnospiraceae_UCG-006          | 4.58   | 0        |
| V3V4 vs Multiplex | Genus   | Roseburia                        | 4.09   | 4.62E-39 |
| V3V4 vs Multiplex | Genus   | A2                               | 1.16   | 0        |
| V3V4 vs Multiplex | Genus   | Lachnospiraceae_UCG-001          | 4.71   | 0        |
| V3V4 vs Multiplex | Genus   | Tepidibacter                     | -11.90 | 0        |
| V3V4 vs Multiplex | Genus   | Bacillus                         | -10.26 | 0        |
| V3V4 vs Multiplex | Genus   | Zymomonas                        | -5.67  | 0        |
| V3V4 vs Multiplex | Genus   | Pigmentiphaga                    | -8.93  | 0        |
| V3V4 vs Multiplex | Genus   | Serratia                         | -4.92  | 0        |
| V3V4 vs Multiplex | Genus   | Libanicoccus                     | -4.86  | 0        |
| V3V4 vs Multiplex | Genus   | Barnesiella                      | -2.28  | 0        |
| V3V4 vs Multiplex | Genus   | Amphiplicatus                    | -10.27 | 0        |
| V3V4 vs Multiplex | Genus   | UCG-003                          | -2.27  | 0        |
| V3V4 vs Multiplex | Genus   | Olsenella                        | -2.75  | 0        |
| V3V4 vs Multiplex | Species | Streptococcus_danieliae          | 1.10   | 0        |
| V3V4 vs Multiplex | Species | Lactobacillus_murinus            | 5.26   | 0        |

---

|                          |         |                                  |        |            |
|--------------------------|---------|----------------------------------|--------|------------|
| V3V4 vs Multiplex        | Species | Lactobacillus_reuteri            | 4.83   | 0          |
| V3V4 vs Multiplex        | Species | Bacteroides_acidifaciens         | 5.68   | 0          |
| V3V4 vs Multiplex        | Species | Bacteroides_caecimuris           | 2.44   | 0          |
| V3V4 vs Multiplex        | Species | Bifidobacterium_choerinum        | 5.17   | 0          |
| V3V4 vs Multiplex        | Species | Adlercreutzia_mucosicola         | 1.14   | 0.0005554  |
| V3V4 vs Multiplex        | Species | Akkermansia_muciniphila          | 6.06   | 0          |
| V3V4 vs Multiplex        | Species | [Clostridium]_leptum             | 1.80   | 5.04E-13   |
| V3V4 vs Multiplex        | Species | Alistipes_finegoldii             | -5.13  | 0          |
| V3V4 vs Multiplex        | Species | Lactobacillus_vaginalis          | -10.58 | 0          |
| V3V4 vs Multiplex        | Species | Muribaculum_intestinale          | -11.31 | 0          |
| V3V4 vs Multiplex        | Species | Mucispirillum_schaedleri         | -6.70  | 0          |
| V3V4 vs Multiplex        | Species | Zymomonas_mobilis                | -5.99  | 0          |
| V3V4 vs Multiplex        | Species | Alistipes_putredinis             | -2.94  | 0          |
| V3V4 vs Multiplex        | Species | [Clostridium]_leptum_1           | -6.43  | 0          |
| V3V4 vs Multiplex        | Species | Adlercreutzia_muris              | -2.63  | 0          |
| V3V4 vs Multiplex        | Species | Staphylococcus_carnosus          | -2.72  | 0          |
| V3V4 vs Multiplex        | Species | Acetatifactor_muris              | -3.50  | 0          |
| V3V4 vs Multiplex        | Species | Parasutterella_excrementihominis | -3.23  | 0          |
| V3V4 vs Multiplex        | Species | Alistipes_nderdonkii             | -2.62  | 0          |
| Full-length vs Multiplex | Phylum  | Firmicutes                       | 0.00   | 0.99       |
| Full-length vs Multiplex | Phylum  | Bacteroidota                     | 0.42   | 0.00       |
| Full-length vs Multiplex | Phylum  | Kingdom:d__Bacteria              | -7.24  | 0.00       |
| Full-length vs Multiplex | Phylum  | Proteobacteria                   | -1.59  | 0.00       |
| Full-length vs Multiplex | Phylum  | Verrucomicrobiota                | 1.54   | 0.00       |
| Full-length vs Multiplex | Phylum  | Actinobacteriota                 | -1.26  | 0.00       |
| Full-length vs Multiplex | Phylum  | Cyanobacteria                    | 4.51   | 0.00       |
| Full-length vs Multiplex | Phylum  | Deferribacterota                 | 0.02   | 0.99       |
| Full-length vs Multiplex | Phylum  | Desulfobacterota                 | 3.77   | 0.00       |
| Full-length vs Multiplex | Class   | Clostridia                       | -0.47  | 0.00381139 |

|                          |       |                                     |       |            |
|--------------------------|-------|-------------------------------------|-------|------------|
| Full-length vs Multiplex | Class | Bacilli                             | 1.34  | 6.31E-09   |
| Full-length vs Multiplex | Class | Bacteroidia                         | 0.59  | 6.31E-09   |
| Full-length vs Multiplex | Class | Alphaproteobacteria                 | -3.07 | 2.28E-56   |
| Full-length vs Multiplex | Class | Gammaproteobacteria                 | 0.01  | 0.96660893 |
| Full-length vs Multiplex | Class | Verrucomicrobiae                    | 1.70  | 1.83E-12   |
| Full-length vs Multiplex | Class | Actinobacteria                      | -0.54 | 0.09744696 |
| Full-length vs Multiplex | Class | Coriobacteriia                      | -2.74 | 1.87E-41   |
| Full-length vs Multiplex | Class | Vampirivibrionia                    | 4.67  | 0          |
| Full-length vs Multiplex | Class | Deferribacteres                     | 0.18  | 0.58096081 |
| Full-length vs Multiplex | Class | Desulfovibrionia                    | 3.93  | 0          |
| Full-length vs Multiplex | Order | Peptostreptococcales-Tissierellales | -5.79 | 1.87E-127  |
| Full-length vs Multiplex | Order | RF39                                | 3.43  | 1.52E-33   |
| Full-length vs Multiplex | Order | Staphylococcales                    | 0.86  | 0          |
| Full-length vs Multiplex | Order | Lactobacillales                     | 4.82  | 6.19E-49   |
| Full-length vs Multiplex | Order | Erysipelotrichales                  | 4.30  | 3.14E-29   |
| Full-length vs Multiplex | Order | Bacteroidales                       | 0.00  | 0.99462661 |
| Full-length vs Multiplex | Order | Clostridia_vadinBB60_group          | 4.29  | 0          |
| Full-length vs Multiplex | Order | Rhodospirillales                    | 0.52  | 0.11918383 |
| Full-length vs Multiplex | Order | Burkholderiales                     | -0.68 | 0.00680327 |
| Full-length vs Multiplex | Order | Verrucomicrobiales                  | 0.97  | 0.00529399 |
| Full-length vs Multiplex | Order | Oscillospirales                     | 1.31  | 1.33E-06   |
| Full-length vs Multiplex | Order | Propionibacteriales                 | 1.15  | 0          |
| Full-length vs Multiplex | Order | Bifidobacteriales                   | -1.28 | 0.00401844 |
| Full-length vs Multiplex | Order | Coriobacteriales                    | -3.47 | 2.02E-28   |
| Full-length vs Multiplex | Order | Gastranaerophilales                 | 3.93  | 0          |
| Full-length vs Multiplex | Order | Deferribacterales                   | -0.56 | 0.14895724 |
| Full-length vs Multiplex | Order | Enterobacterales                    | -0.12 | 0.84676484 |
| Full-length vs Multiplex | Order | Desulfovibrionales                  | 3.19  | 0          |
| Full-length vs Multiplex | Order | Peptococcales                       | 3.80  | 0          |

---

|                          |        |                            |       |            |
|--------------------------|--------|----------------------------|-------|------------|
| Full-length vs Multiplex | Order  | Monoglobales               | 3.20  | 0          |
| Full-length vs Multiplex | Order  | Clostridia_UCG-014         | 6.56  | 0          |
| Full-length vs Multiplex | Order  | Lachnospirales             | 5.39  | 5.02E-89   |
| Full-length vs Multiplex | Order  | Bacillales                 | -7.09 | 0          |
| Full-length vs Multiplex | Order  | Sphingomonadales           | -2.50 | 0          |
| Full-length vs Multiplex | Order  | Caulobacterales            | -7.10 | 0          |
| Full-length vs Multiplex | Family | Anaerovoracaceae           | 3.50  | 0          |
| Full-length vs Multiplex | Family | RF39                       | 2.58  | 3.66E-21   |
| Full-length vs Multiplex | Family | Staphylococcaceae          | 0.00  | 0          |
| Full-length vs Multiplex | Family | Streptococcaceae           | 0.94  | 0.00012765 |
| Full-length vs Multiplex | Family | Lactobacillaceae           | 3.98  | 7.88E-36   |
| Full-length vs Multiplex | Family | Erysipelatoclostridiaceae  | 3.32  | 0          |
| Full-length vs Multiplex | Family | Erysipelotrichaceae        | 2.88  | 7.14E-12   |
| Full-length vs Multiplex | Family | Prevotellaceae             | 3.22  | 1.67E-15   |
| Full-length vs Multiplex | Family | Marinifilaceae             | -0.39 | 0.2775509  |
| Full-length vs Multiplex | Family | Rikenellaceae              | -1.10 | 1.60E-08   |
| Full-length vs Multiplex | Family | Muribaculaceae             | -0.39 | 0.06114152 |
| Full-length vs Multiplex | Family | Bacteroidaceae             | -1.41 | 3.14E-12   |
| Full-length vs Multiplex | Family | Clostridia_vadinBB60_group | 3.44  | 0          |
| Full-length vs Multiplex | Family | Sutterellaceae             | 3.27  | 4.10E-38   |
| Full-length vs Multiplex | Family | Akkermansiaceae            | 0.11  | 0.77213393 |
| Full-length vs Multiplex | Family | UCG-010                    | 2.94  | 0          |
| Full-length vs Multiplex | Family | Propionibacteriaceae       | 0.29  | 0          |
| Full-length vs Multiplex | Family | Bifidobacteriaceae         | -2.13 | 7.61E-07   |
| Full-length vs Multiplex | Family | Atopobiaceae               | -4.37 | 6.40E-36   |
| Full-length vs Multiplex | Family | Eggerthellaceae            | -3.94 | 2.87E-54   |
| Full-length vs Multiplex | Family | Gastranaerophilales        | 3.08  | 0          |
| Full-length vs Multiplex | Family | Deferribacteraceae         | -1.41 | 0.0001473  |
| Full-length vs Multiplex | Family | Enterobacteriaceae         | 1.93  | 3.24E-07   |

---

|                          |        |                                       |       |            |
|--------------------------|--------|---------------------------------------|-------|------------|
| Full-length vs Multiplex | Family | Desulfovibrionaceae                   | 2.34  | 0          |
| Full-length vs Multiplex | Family | Peptococcaceae                        | 2.95  | 0          |
| Full-length vs Multiplex | Family | Butyricicoccaceae                     | 2.93  | 1.19E-24   |
| Full-length vs Multiplex | Family | [Eubacterium]_coprostanoligenes_group | 2.29  | 0          |
| Full-length vs Multiplex | Family | Ruminococcaceae                       | 2.42  | 3.08E-18   |
| Full-length vs Multiplex | Family | Oscillospiraceae                      | -0.97 | 0.00102157 |
| Full-length vs Multiplex | Family | Monoglobaceae                         | 2.34  | 0          |
| Full-length vs Multiplex | Family | Clostridia_UCG-014                    | 5.71  | 0          |
| Full-length vs Multiplex | Family | Lachnospiraceae                       | 4.53  | 6.76E-70   |
| Full-length vs Multiplex | Family | Defluviitaleaceae                     | 2.39  | 0          |
| Full-length vs Multiplex | Family | Peptostreptococcaceae                 | -9.58 | 0          |
| Full-length vs Multiplex | Family | Bacillaceae                           | -7.94 | 0          |
| Full-length vs Multiplex | Family | Tannerellaceae                        | -1.52 | 1.43E-06   |
| Full-length vs Multiplex | Family | Sphingomonadaceae                     | -3.35 | 0          |
| Full-length vs Multiplex | Family | Alcaligenaceae                        | -6.61 | 0          |
| Full-length vs Multiplex | Family | Yersiniaceae                          | -2.61 | 0          |
| Full-length vs Multiplex | Family | Barnesiellaceae                       | 0.04  | 0          |
| Full-length vs Multiplex | Family | Parvularculaceae                      | -7.95 | 0          |
| Full-length vs Multiplex | Genus  | Anaerovorax                           | 0.00  | 0          |
| Full-length vs Multiplex | Genus  | Family_XIII_AD3011_group              | 0.21  | 0          |
| Full-length vs Multiplex | Genus  | [Eubacterium]_nodatum_group           | 1.98  | 0          |
| Full-length vs Multiplex | Genus  | [Eubacterium]_brachy_group            | 0.76  | 0          |
| Full-length vs Multiplex | Genus  | Family_XIII_UCG-001                   | 0.02  | 0          |
| Full-length vs Multiplex | Genus  | RF39                                  | 1.60  | 5.69E-16   |
| Full-length vs Multiplex | Genus  | Staphylococcus                        | -0.97 | 0          |
| Full-length vs Multiplex | Genus  | Streptococcus                         | -0.03 | 0.8788774  |
| Full-length vs Multiplex | Genus  | Lactobacillus                         | 3.00  | 4.71E-34   |
| Full-length vs Multiplex | Genus  | Erysipelatoclostridium                | 1.20  | 0          |
| Full-length vs Multiplex | Genus  | Faecalibaculum                        | 4.39  | 0          |

---



|                          |       |                                       |       |            |
|--------------------------|-------|---------------------------------------|-------|------------|
| Full-length vs Multiplex | Genus | Prevotellaceae_UCG-001                | 2.98  | 0          |
| Full-length vs Multiplex | Genus | Odoribacter                           | -1.36 | 2.16E-07   |
| Full-length vs Multiplex | Genus | Rikenellaceae_RC9_gut_group           | -2.31 | 1.32E-19   |
| Full-length vs Multiplex | Genus | Alistipes                             | -2.05 | 3.91E-76   |
| Full-length vs Multiplex | Genus | Muribaculaceae                        | 6.43  | 0          |
| Full-length vs Multiplex | Genus | Muribaculum                           | -4.73 | 6.10E-234  |
| Full-length vs Multiplex | Genus | Bacteroides                           | -2.38 | 1.01E-79   |
| Full-length vs Multiplex | Genus | Clostridia_vadinBB60_group            | 2.46  | 0          |
| Full-length vs Multiplex | Genus | Parasutterella                        | 2.30  | 1.21E-35   |
| Full-length vs Multiplex | Genus | Akkermansia                           | -0.86 | 0.00099096 |
| Full-length vs Multiplex | Genus | UCG-010                               | 1.97  | 0          |
| Full-length vs Multiplex | Genus | Cutibacterium                         | -0.68 | 0          |
| Full-length vs Multiplex | Genus | Bifidobacterium                       | -3.11 | 2.29E-18   |
| Full-length vs Multiplex | Genus | Enterorhabdus                         | -4.30 | 9.04E-134  |
| Full-length vs Multiplex | Genus | Gastranaerophilales                   | 2.11  | 0          |
| Full-length vs Multiplex | Genus | Mucispirillum                         | -2.38 | 5.67E-17   |
| Full-length vs Multiplex | Genus | Salmonella                            | 1.22  | 0          |
| Full-length vs Multiplex | Genus | Bilophila                             | 1.37  | 0          |
| Full-length vs Multiplex | Genus | Peptococcus                           | 0.22  | 0          |
| Full-length vs Multiplex | Genus | uncultured_3                          | 1.89  | 0          |
| Full-length vs Multiplex | Genus | UCG-009                               | 1.55  | 0          |
| Full-length vs Multiplex | Genus | Butyricicoccus                        | 0.92  | 0          |
| Full-length vs Multiplex | Genus | [Eubacterium]_coprostanoligenes_group | 1.32  | 0          |
| Full-length vs Multiplex | Genus | Harryflintia                          | -0.05 | 0          |
| Full-length vs Multiplex | Genus | Paludicola                            | -0.12 | 0          |
| Full-length vs Multiplex | Genus | Anaerotruncus                         | 2.12  | 8.00E-22   |
| Full-length vs Multiplex | Genus | [Eubacterium]_siraeum_group           | 0.63  | 0          |
| Full-length vs Multiplex | Genus | Ruminococcus                          | 4.12  | 2.05E-155  |
| Full-length vs Multiplex | Genus | UCG-005                               | 0.27  | 0          |

---

|                          |       |                                  |        |            |
|--------------------------|-------|----------------------------------|--------|------------|
| Full-length vs Multiplex | Genus | Oscillibacter                    | -2.68  | 2.14E-28   |
| Full-length vs Multiplex | Genus | NK4A214_group                    | -0.02  | 0          |
| Full-length vs Multiplex | Genus | Colidextribacter                 | 0.79   | 0.00048695 |
| Full-length vs Multiplex | Genus | Monoglobus                       | 1.37   | 0          |
| Full-length vs Multiplex | Genus | Clostridia_UCG-014               | 4.73   | 0          |
| Full-length vs Multiplex | Genus | Defluviitaleaceae_UCG-011        | 1.42   | 0          |
| Full-length vs Multiplex | Genus | ASF356                           | 2.21   | 0          |
| Full-length vs Multiplex | Genus | Tuzzerella                       | 0.72   | 0          |
| Full-length vs Multiplex | Genus | GCA-900066575                    | 1.61   | 0          |
| Full-length vs Multiplex | Genus | Lachnospiraceae_FCS020_group     | 0.08   | 0          |
| Full-length vs Multiplex | Genus | [Eubacterium]_xylanophilum_group | 2.85   | 0          |
| Full-length vs Multiplex | Genus | Lachnospiraceae_NK4A136_group    | 5.56   | 0          |
| Full-length vs Multiplex | Genus | [Eubacterium]_fissicatena_group  | 3.31   | 0          |
| Full-length vs Multiplex | Genus | Acetatifactor                    | -1.70  | 1.55E-16   |
| Full-length vs Multiplex | Genus | Blautia                          | 0.96   | 0.00014162 |
| Full-length vs Multiplex | Genus | Marvinbryantia                   | 0.64   | 0          |
| Full-length vs Multiplex | Genus | Lachnoclostridium                | 2.10   | 2.07E-22   |
| Full-length vs Multiplex | Genus | Lachnospiraceae_UCG-006          | 3.28   | 0          |
| Full-length vs Multiplex | Genus | Roseburia                        | 2.46   | 2.56E-20   |
| Full-length vs Multiplex | Genus | A2                               | 0.14   | 0          |
| Full-length vs Multiplex | Genus | Lachnospiraceae_UCG-001          | 3.36   | 0          |
| Full-length vs Multiplex | Genus | Tepidibacter                     | -10.55 | 0          |
| Full-length vs Multiplex | Genus | Bacillus                         | -8.91  | 0          |
| Full-length vs Multiplex | Genus | Zymomonas                        | -4.33  | 0          |
| Full-length vs Multiplex | Genus | Pigmentiphaga                    | -7.59  | 0          |
| Full-length vs Multiplex | Genus | Serratia                         | -3.58  | 0          |
| Full-length vs Multiplex | Genus | Libanicoccus                     | -3.52  | 0          |
| Full-length vs Multiplex | Genus | Barnesiella                      | -0.94  | 0          |
| Full-length vs Multiplex | Genus | Amphiplicatus                    | -8.92  | 0          |

---

|                          |         |                                  |       |            |
|--------------------------|---------|----------------------------------|-------|------------|
| Full-length vs Multiplex | Genus   | UCG-003                          | -0.93 | 0          |
| Full-length vs Multiplex | Genus   | Olsenella                        | 0.15  | 0.59050629 |
| Full-length vs Multiplex | Genus   | Parabacteroides                  | 0.75  | 0          |
| Full-length vs Multiplex | Species | Streptococcus_danieliae          | -0.14 | 0          |
| Full-length vs Multiplex | Species | Lactobacillus_murinus            | 4.05  | 0          |
| Full-length vs Multiplex | Species | Lactobacillus_reuteri            | 4.04  | 0          |
| Full-length vs Multiplex | Species | Bacteroides_acidifaciens         | 3.88  | 0          |
| Full-length vs Multiplex | Species | Bacteroides_caecimuris           | 2.00  | 0          |
| Full-length vs Multiplex | Species | Adlercreutzia_mucosicola         | -0.63 | 0.00089084 |
| Full-length vs Multiplex | Species | Akkermansia_muciniphila          | 5.70  | 0          |
| Full-length vs Multiplex | Species | Burkholderiales_bacterium        | 4.27  | 0          |
| Full-length vs Multiplex | Species | Alistipes_finegoldii             | -3.69 | 0          |
| Full-length vs Multiplex | Species | Lactobacillus_vaginalis          | -9.14 | 0          |
| Full-length vs Multiplex | Species | Muribaculum_intestinale          | -6.34 | 5.94E-271  |
| Full-length vs Multiplex | Species | Mucispirillum_schaedleri         | -2.60 | 1.02E-22   |
| Full-length vs Multiplex | Species | Zymomonas_mobilis                | -4.55 | 0          |
| Full-length vs Multiplex | Species | Alistipes_putredinis             | -1.50 | 0          |
| Full-length vs Multiplex | Species | [Clostridium]_leptum_1           | -4.99 | 0          |
| Full-length vs Multiplex | Species | Adlercreutzia_muris              | -1.18 | 0          |
| Full-length vs Multiplex | Species | Staphylococcus_carnosus          | -1.28 | 0          |
| Full-length vs Multiplex | Species | Acetatifactor_muris              | -2.06 | 0          |
| Full-length vs Multiplex | Species | Parasutterella_excrementihominis | -1.79 | 0          |
| Full-length vs Multiplex | Species | Alistipes_nderdonkii             | -1.18 | 0          |
| Full-length vs Multiplex | Species | Lactobacillus_johnsonii          | 5.70  | 0          |
| Full-length vs Multiplex | Species | Bifidobacterium_pseudolongum     | 4.16  | 0          |
| Full-length vs Multiplex | Species | [Clostridium]_leptum_3           | 1.35  | 0          |
| Full-length vs Multiplex | Species | Parabacteroides_goldsteinii      | 0.53  | 0          |

---
