# Supplementary material for: Amplicon-Based Microbiome Profiling: From Second- to Third-Generation Sequencing for Higher Taxonomic Resolution
Source: MDPI journal article supplement (doi:10.3390/genes14081567), 2023-07-31

**Supplementary Figure S2: The observed 16S rRNA gene coverage by the multiplex approach.** The figure shows the different coverage of the 16S rRNA gene produced by multiplex raw reads (“Multiplex”) and pASVs (“Multiplex ASV”). Only the species identified by both multiplex raw reads (18/20) and pASVs (12/20) are shown.

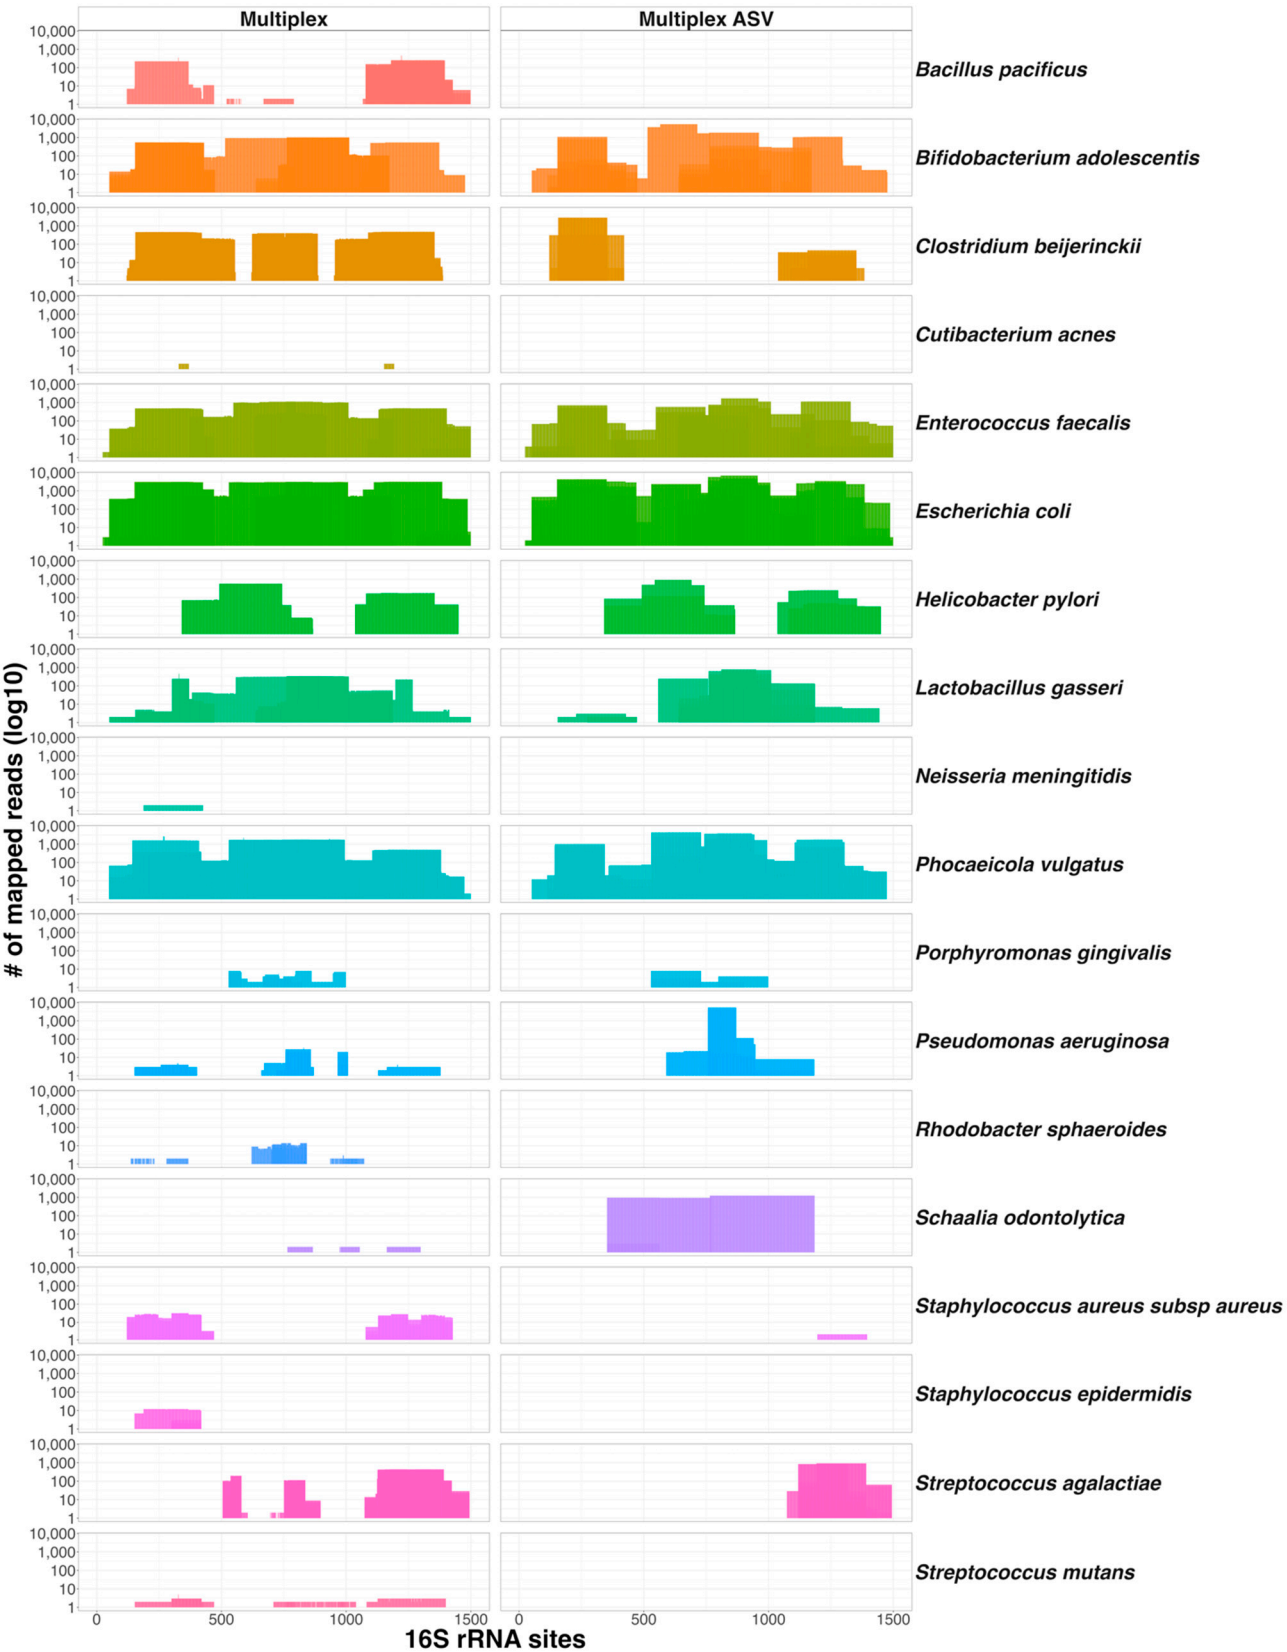

Supplement: s1 [file s1]
