# Supplementary material for: Amplicon-Based Microbiome Profiling: From Second- to Third-Generation Sequencing for Higher Taxonomic Resolution
Source: MDPI journal article supplement (doi:10.3390/genes14081567), 2023-07-31
Supplement: s1 [file s1]

**Supplementary Table S2: The expected and observed 16S rRNA abundances (%) for each sequencing approach at the genus and species level.**

|                                     | Expected (%) |       | Observed (%) |       |           |             |
|-------------------------------------|--------------|-------|--------------|-------|-----------|-------------|
|                                     |              | V3V4  | V5V6         | V4    | Multiplex | Full-length |
| <b>Genus</b>                        |              |       |              |       |           |             |
| <i>Acinetobacter</i>                | 4.07         | 6.76  | 11.46        | 7.19  | 0.00      | 7.60        |
| <i>Bacillus</i>                     | 7.12         | 7.60  | 0.95         | 9.94  | 0.00      | 1.97        |
| <i>Bacteroides</i>                  | 3.75         | 7.62  | 0.00         | 6.66  | 0.34      | 5.79        |
| <i>Bifidobacterium</i>              | 6.62         | 4.12  | 1.73         | 4.17  | 0.21      | 2.18        |
| <i>Clostridium</i>                  | 6.91         | 13.2  | 37.6         | 13.8  | 7         | 9.42        |
| <i>Cutibacterium</i>                | 3.33         | 0.43  | 0.00         | 1.31  | 0.00      | 3.08        |
| <i>Deinococcus</i>                  | 2.53         | 2.06  | 0.00         | 3.86  | 0.00      | 4.52        |
| <i>Enterococcus</i>                 | 4.04         | 2.90  | 0.88         | 3.58  | 0.21      | 2.38        |
| <i>Escherichia-Shigella</i>         | 4.17         | 6.90  | 0.63         | 5.76  | 0.39      | 6.60        |
| <i>Helicobacter</i>                 | 3.32         | 3.12  | 0.00         | 2.52  | 0.04      | 3.62        |
| <i>Lactobacillus</i>                | 8.96         | 5.09  | 0.00         | 5.74  | 0.20      | 6.77        |
| <i>Neisseria</i>                    | 4.94         | 3.50  | 0.00         | 3.85  | 0.00      | 7.37        |
| <i>Porphyromonas</i>                | 4.62         | 6.39  | 0.00         | 3.39  | 0.00      | 9.41        |
| <i>Pseudomonas</i>                  | 1.74         | 2.72  | 0.30         | 2.38  | 0.03      | 2.72        |
| <i>Rhodobacter</i>                  | 2.47         | 0.77  | 0.00         | 1.30  | 0.00      | 1.57        |
| <i>Schaalia</i>                     | 3.47         | 2.30  | 0.2          | 1.75  | 0.00      | 0.36        |
| <i>Staphylococcus</i>               | 12.15        | 11.23 | 13.58        | 12.31 | 0.004     | 10.21       |
| <i>Streptococcus</i>                | 15.79        | 13.17 | 1.30         | 10.07 | 0.05      | 14.31       |
| <b>Species</b>                      |              |       |              |       |           |             |
| <i>Acinetobacter baumannii</i>      | 4.08         | 6.75  | 0.00         | 0.00  | 0.00      | 7.60        |
| <i>Bacillus pacificus</i>           | 7.12         | 0.00  | 0.00         | 0.00  | 0.00      | 0.00        |
| <i>Bacteroides vulgatus</i>         | 3.75         | 7.60  | 0.00         | 6.66  | 0.002     | 5.79        |
| <i>Bifidobacterium adolescentis</i> | 6.62         | 3.83  | 0.00         | 0.00  | 0.02      | 2.18        |
| <i>Clostridium beijerinckii</i>     | 6.91         | 0.00  | 0.00         | 0.83  | 0.00      | 9.42        |

| Expected (%)                      |      | Observed (%) |      |      |           |             |
|-----------------------------------|------|--------------|------|------|-----------|-------------|
|                                   |      | V3V4         | V5V6 | V4   | Multiplex | Full-length |
| <i>Cutibacterium acnes</i>        | 3.33 | 0.00         | 0.00 | 0.00 | 0.00      | 0.00        |
| <i>Deinococcus radiodurans</i>    | 2.53 | 2.05         | 0.00 | 3.86 | 0.00      | 4.52        |
| <i>Enterococcus faecalis</i>      | 4.04 | 0.00         | 0.18 | 0.00 | 0.06      | 2.38        |
| <i>Escherichia coli</i>           | 4.17 | 0.00         | 0.62 | 0.00 | 0.00      | 0.00        |
| <i>Helicobacter pylori</i>        | 3.32 | 3.11         | 0.00 | 2.52 | 0.004     | 3.62        |
| <i>Lactobacillus gasseri</i>      | 8.96 | 5.00         | 0.00 | 0.00 | 0.00      | 6.77        |
| <i>Neisseria meningitidis</i>     | 4.94 | 3.50         | 0.00 | 3.85 | 0.00      | 7.37        |
| <i>Porphyromonas gingivalis</i>   | 4.62 | 6.39         | 0.00 | 3.39 | 0.00      | 9.41        |
| <i>Pseudomonas aeruginosa</i>     | 1.74 | 0.00         | 0.30 | 0.00 | 0.00      | 2.72        |
| <i>Rhodobacter sphaeroides</i>    | 2.47 | 0.77         | 0.00 | 0.00 | 0.00      | 1.57        |
| <i>Schaalia odontolytica</i>      | 3.47 | 2.27         | 0.00 | 1.75 | 0.00      | 0.36        |
| <i>Staphylococcus aureus</i>      | 5.70 | 0.00         | 0.00 | 0.00 | 0.00      | 0.00        |
| <i>Staphylococcus epidermidis</i> | 6.45 | 0.00         | 0.02 | 0.00 | 0.00      | 0.00        |
| <i>Streptococcus agalactiae</i>   | 8.97 | 6.84         | 0.00 | 5.55 | 0.00      | 7.24        |
| <i>Streptococcus mutans</i>       | 6.81 | 6.29         | 0.00 | 4.52 | 0.00      | 7.07        |
