# Supplementary material for: Amplicon-Based Microbiome Profiling: From Second- to Third-Generation Sequencing for Higher Taxonomic Resolution
Source: MDPI journal article supplement (doi:10.3390/genes14081567), 2023-07-31
Supplement: s1 [file s1]

**Supplementary Table S5. ASVs mapping to the reference genomes and the corresponding absolute and relative abundances.** Parameters considered: query coverage  $\geq 90\%$  and similarity  $\geq 97\%$ . “Genome” represents the contig where the ASVs align and “sstart” / “send” the location coordinates; “pident” is the % of similarity. “Method” refers to the sequencing approach. “Genome Name” is the name of the species of the mock. whereas “Assigned Species” and “Assigned Genus” correspond to the classification obtained at species and genus level, respectively. “Expected” shows whether the region of the match is annotated as the 16S rRNA gene.

| ASV                                      | Genome | pident | sstart | send | Method | Genome Name | Expected | Assigned Species                                                                                                                                             | Assigned Genus                                                                                                                     | abs          | rel  |
|------------------------------------------|--------|--------|--------|------|--------|-------------|----------|--------------------------------------------------------------------------------------------------------------------------------------------------------------|------------------------------------------------------------------------------------------------------------------------------------|--------------|------|
| 116988315318af8<br>14daac19fb60efb<br>18 |        |        |        |      | V3V4   |             |          |                                                                                                                                                              | d__Bacteria;p__Firmicutes;c__Bacilli;<br>o__Lactobacillales;f__Streptococcace<br>ae;g__Streptococcus                               | 2            | 0.00 |
| ddd048fa84342d<br>57fc92066835939<br>98c |        |        |        |      | V3V4   |             |          |                                                                                                                                                              | d__Bacteria;p__Firmicutes;c__Bacilli;<br>o__Staphylococcales;f__Staphylococ<br>caceae;g__Staphylococcus                            | 1.00E<br>+00 | 0.00 |
| 0af0987236663cf<br>1a404ee8f8d0d9<br>ef4 |        |        |        |      | V3V4   |             |          |                                                                                                                                                              | d__Bacteria;p__Bacteroidota;c__Bact<br>eroidia;o__Bacteroidales;f__Bacteroi<br>daceae;g__Bacteroides                               | 4            | 0.00 |
| c84fc45ac0df1b3<br>6f969d4b7d4b4d<br>76a |        |        |        |      | V3V4   |             |          |                                                                                                                                                              | d__Bacteria;p__Actinobacteriota;c__<br>Actinobacteria;o__Bifidobacteriales;f__<br>Bifidobacteriaceae;g__Bifidobacter<br>ium        | 1            | 0.00 |
| 2fd84e313a8e8a4<br>5246db82a092a0<br>3c1 |        |        |        |      | V3V4   |             |          | d__Bacteria;p__Proteobacteria;c__Ga<br>mmaproteobacteria;o__Enterobacter<br>ales;f__Enterobacteriaceae;g__Escher<br>ichia-Shigella;<br>s__uncultured_Pantoea | d__Bacteria;p__Proteobacteria;c__Ga<br>mmaproteobacteria;o__Enterobacter<br>ales;f__Enterobacteriaceae;g__Escher<br>ichia-Shigella | 1            | 0.00 |
| 9d3843fd30f6e58<br>82ad76d87bf912<br>be1 |        |        |        |      | V3V4   |             |          | d__Bacteria;p__Actinobacteriota;c__<br>Actinobacteria;o__Bifidobacteriales;f__<br>Bifidobacteriaceae;g__Bifidobacter<br>ium;s__Bifidobacterium_faecale       | d__Bacteria;p__Actinobacteriota;c__<br>Actinobacteria;o__Bifidobacteriales;f__<br>Bifidobacteriaceae;g__Bifidobacter<br>ium        | 2            | 0.00 |
| 80b9934b6e140e<br>0309d745b33db8<br>da19 |        |        |        |      | V3V4   |             |          |                                                                                                                                                              | d__Bacteria;p__Firmicutes;c__Bacilli;<br>o__Lactobacillales;f__Enterococcacea<br>e;g__Enterococcus                                 | 3            | 0.00 |
| b347624d5c5225<br>ccf4cd38d7a0dcc<br>598 |        |        |        |      | V3V4   |             |          |                                                                                                                                                              | d__Bacteria;p__Proteobacteria;c__Ga<br>mmaproteobacteria;o__Enterobacter<br>ales;f__Enterobacteriaceae;g__Escher<br>ichia-Shigella | 2            | 0.00 |
| f9aa8d0e7ab74d<br>d5b1c80f4e823b6<br>886 |        |        |        |      | V3V4   |             |          |                                                                                                                                                              | d__Bacteria;p__Actinobacteriota;c__<br>Actinobacteria;o__Bifidobacteriales;f__                                                     | 4            | 0.00 |

|                                  |      |                                                                                                                      |                                                                                                                 |          |      |
|----------------------------------|------|----------------------------------------------------------------------------------------------------------------------|-----------------------------------------------------------------------------------------------------------------|----------|------|
|                                  |      |                                                                                                                      | __Bifidobacteriaceae;g__Bifidobacterium                                                                         |          |      |
| 456726fcb18558bdbc6377e38896547e | V3V4 |                                                                                                                      | d__Bacteria;p__Proteobacteria;c__Gammaproteobacteria;o__Pseudomonadales;f__Pseudomonadaceae;g__Pseudomonas      | 19       | 0.02 |
| 6a0eae87b93fd07ad46db3b1eaabd43  | V3V4 |                                                                                                                      | d__Bacteria;p__Firmicutes;c__Bacilli;o__Lactobacillales;f__Lactobacillaceae;g__Lactobacillus                    | 2        | 0.00 |
| 1c98130024b2622235bedbaf30c690d9 | V3V4 |                                                                                                                      | d__Bacteria;p__Bacteroidota;c__Bacteroidia;o__Bacteroidales;f__Bacteroidaceae;g__Bacteroides                    | 1.00E+00 | 0.00 |
| e22ead36335328e214f9b66dfb1b30d1 | V3V4 |                                                                                                                      | d__Bacteria;p__Proteobacteria;c__Gammaproteobacteria;o__Pseudomonadales;f__Pseudomonadaceae;g__Pseudomonas      | 3        | 0.00 |
| ac2d45456f92a5bc851ac12762130a96 | V3V4 |                                                                                                                      |                                                                                                                 | 5        | 0.01 |
| 1c02778d589eec0fecf00d976b50fec8 | V3V4 |                                                                                                                      | d__Bacteria;p__Campilobacterota;c__Campylobacteria;o__Campylobacterales;f__Helicobacteraceae;g__Helicobacter    | 2        | 0.00 |
| ab86e2b48526034e6f335615a043d483 | V3V4 |                                                                                                                      | d__Bacteria;p__Firmicutes;c__Bacilli;o__Lactobacillales;f__Lactobacillaceae;g__Lactobacillus                    | 1        | 0.00 |
| b0a2169e2a052ead8185d4ac9668ede5 | V3V4 |                                                                                                                      | d__Bacteria;p__Firmicutes;c__Bacilli;o__Lactobacillales;f__Lactobacillaceae;g__Lactobacillus                    | 2        | 0.00 |
| 245ba600e28a95b9df533245cb5a222d | V3V4 | d__Bacteria;p__Firmicutes;c__Bacilli;o__Lactobacillales;f__Lactobacillaceae;g__Lactobacillus;s__uncultured_bacterium | d__Bacteria;p__Firmicutes;c__Bacilli;o__Lactobacillales;f__Lactobacillaceae;g__Lactobacillus                    | 25       | 0.03 |
| 4dbd2311865e718e629475768ec56594 | V3V4 |                                                                                                                      |                                                                                                                 | 4        | 0.00 |
| 5a92b2a407a87bb5d987cec082ef10db | V3V4 |                                                                                                                      | d__Bacteria;p__Proteobacteria;c__Gammaproteobacteria;o__Pseudomonadales;f__Pseudomonadaceae;g__Pseudomonas      | 4        | 0.00 |
| ae8c26f926b77ff67bb2949dbc67be3  | V3V4 |                                                                                                                      | d__Bacteria;p__Actinobacteriota;c__Actinobacteria;o__Bifidobacteriales;f__Bifidobacteriaceae;g__Bifidobacterium | 1        | 0.00 |

|                                          |      |                                                                                                                                       |                                                                                                            |    |      |
|------------------------------------------|------|---------------------------------------------------------------------------------------------------------------------------------------|------------------------------------------------------------------------------------------------------------|----|------|
| 3871f21058d3b1<br>9c17520843acb6e<br>109 | V3V4 | d__Bacteria;p__Proteobacteria;c__Gammaproteobacteria;o__Pseudomonadales;f__Pseudomonadaceae;g__Pseudomonas;s__uncultured_Marinobacter | d__Bacteria;p__Proteobacteria;c__Gammaproteobacteria;o__Pseudomonadales;f__Pseudomonadaceae;g__Pseudomonas | 2  | 0.00 |
| e9970500442b31<br>68e1d6522bb65e<br>33f3 | V3V4 |                                                                                                                                       | d__Bacteria;p__Actinobacteriota;c__Actinobacteria;o__Actinomycetales;f__Actinomycetaceae;g__Actinomyces    | 3  | 0.00 |
| b154827d580ab4<br>4bf2c451c4f9e74<br>a60 | V3V4 |                                                                                                                                       | d__Bacteria;p__Firmicutes;c__Bacilli;o__Lactobacillales;f__Enterococcaceae;g__Enterococcus                 | 3  | 0.00 |
| 052f8d7804cf053<br>a144f4474566d4f<br>d0 | V3V4 | d__Bacteria;p__Firmicutes;c__Bacilli;o__Lactobacillales;f__Streptococcaceae;g__Streptococcus;s__Streptococcus_troglodytae             | d__Bacteria;p__Firmicutes;c__Bacilli;o__Lactobacillales;f__Streptococcaceae;g__Streptococcus               | 5  | 0.01 |
| d86828b11a697d<br>3aee5c4d466b98<br>8380 | V3V4 | d__Bacteria;p__Firmicutes;c__Bacilli;o__Lactobacillales;f__Lactobacillaceae;g__Lactobacillus;s__uncultured_bacterium                  | d__Bacteria;p__Firmicutes;c__Bacilli;o__Lactobacillales;f__Lactobacillaceae;g__Lactobacillus               | 18 | 0.02 |
| 2f11acb78d09ec9<br>436a120ef712836<br>de | V3V4 |                                                                                                                                       | d__Bacteria;p__Firmicutes;c__Bacilli;o__Staphylococcales;f__Staphylococcaceae;g__Staphylococcus            | 3  | 0.00 |
| 80dbafcfb4b1f68<br>4d52673147ac8d<br>308 | V3V4 | d__Bacteria;p__Bacteroidota;c__Bacteroidia;o__Bacteroidales;f__Bacteroidaceae;g__Bacteroides;s__Bacteroides_thetaiotaomicron          | d__Bacteria;p__Bacteroidota;c__Bacteroidia;o__Bacteroidales;f__Bacteroidaceae;g__Bacteroides               | 5  | 0.01 |
| 901163b6f627002<br>d8cbc1afae9f4f4<br>05 | V3V4 | d__Bacteria;p__Firmicutes;c__Bacilli;o__Lactobacillales;f__Lactobacillaceae;g__Lactobacillus;s__uncultured_bacterium                  | d__Bacteria;p__Firmicutes;c__Bacilli;o__Lactobacillales;f__Lactobacillaceae;g__Lactobacillus               | 1  | 0.00 |
| 2c5c63739b3f140<br>a688647b359e29<br>0c1 | V3V4 | d__Bacteria;p__Firmicutes;c__Bacilli;o__Lactobacillales;f__Streptococcaceae;g__Streptococcus;s__Streptococcus_troglodytae             | d__Bacteria;p__Firmicutes;c__Bacilli;o__Lactobacillales;f__Streptococcaceae;g__Streptococcus               | 1  | 0.00 |
| 7ffac11a381face9<br>86d02ca535d4ac<br>b4 | V3V4 |                                                                                                                                       | d__Bacteria;p__Actinobacteriota;c__Actinobacteria;o__Actinomycetales;f__Actinomycetaceae;g__Actinomyces    | 1  | 0.00 |
| 063506beba6c1fb<br>b0929c8d0e8a3ff<br>81 | V3V4 | d__Bacteria;p__Actinobacteriota;c__Actinobacteria;o__Actinomycetales;f__Actinomycetaceae;g__Actinomyces;s__Mycobacterium_tuberculosis | d__Bacteria;p__Actinobacteriota;c__Actinobacteria;o__Actinomycetales;f__Actinomycetaceae;g__Actinomyces    | 1  | 0.00 |

|                                          |      |                                                                                                                           |                                                                                                           |          |      |
|------------------------------------------|------|---------------------------------------------------------------------------------------------------------------------------|-----------------------------------------------------------------------------------------------------------|----------|------|
| 66fc81d0779ee35<br>43c336e55f997ff1<br>8 | V3V4 |                                                                                                                           | d__Bacteria;p__Proteobacteria;c__Gammaproteobacteria;o__Pseudomonadales;f__Moraxellaceae;g__Acinetobacter | 1        | 0.00 |
| 33bc5391ced327<br>08caab9eeee2f6d<br>17a | V3V4 | d__Bacteria;p__Firmicutes;c__Bacilli;o__Lactobacillales;f__Streptococcaceae;g__Streptococcus;s__Streptococcus_troglodytae | d__Bacteria;p__Firmicutes;c__Bacilli;o__Lactobacillales;f__Streptococcaceae;g__Streptococcus              | 7        | 0.01 |
| e8119a79e6d3fd<br>00d40d024ec7db<br>9280 | V3V4 |                                                                                                                           | d__Bacteria;p__Firmicutes;c__Bacilli;o__Staphylococcales;f__Staphylococcaceae;g__Staphylococcus           | 1        | 0.00 |
| 847571fab7d7e46<br>326f4d957421d5<br>5f4 | V3V4 |                                                                                                                           | d__Bacteria;p__Firmicutes;c__Bacilli;o__Lactobacillales;f__Lactobacillaceae;g__Lactobacillus              | 2        | 0.00 |
| e61cd640ab153c<br>0aa0eb50ef858c4<br>762 | V3V4 |                                                                                                                           | d__Bacteria;p__Deinococcota;c__Deinococci;o__Deinococcales;f__Deinococcaceae;g__Deinococcus               | 2        | 0.00 |
| 3ca103332462a6f<br>22bc3f3a71e1928<br>61 | V3V4 |                                                                                                                           |                                                                                                           | 4        | 0.00 |
| c66358457390ce9<br>93711d5e370a5f2<br>86 | V3V4 |                                                                                                                           | d__Bacteria;p__Firmicutes;c__Bacilli;o__Lactobacillales;f__Lactobacillaceae;g__Lactobacillus              | 1        | 0.00 |
| 6076e162d2870c<br>ad4ff4cccf66bea5<br>62 | V3V4 |                                                                                                                           |                                                                                                           | 1        | 0.00 |
| 07a15062be8ee3<br>0ddc3329c1e787<br>68dc | V3V4 |                                                                                                                           | d__Bacteria;p__Firmicutes;c__Bacilli;o__Lactobacillales;f__Enterococcaceae;g__Enterococcus                | 4.00E+00 | 0.00 |
| edd5425137c3ff7<br>76e8e9bc317afb5<br>8b | V3V4 | d__Bacteria;p__Firmicutes;c__Bacilli;o__Lactobacillales;f__Streptococcaceae;g__Streptococcus;s__Streptococcus_troglodytae | d__Bacteria;p__Firmicutes;c__Bacilli;o__Lactobacillales;f__Streptococcaceae;g__Streptococcus              | 4        | 0.00 |
| 905130d5a231d4<br>3581bea3477d95<br>3f09 | V3V4 |                                                                                                                           | d__Bacteria;p__Firmicutes;c__Bacilli;o__Lactobacillales;f__Lactobacillaceae;g__Lactobacillus              | 1        | 0.00 |
| b527ff38a17f5fd<br>b76c2636c890e15<br>ce | V3V4 |                                                                                                                           | d__Bacteria;p__Firmicutes;c__Clostridia;o__Clostridiales;f__Clostridiaceae;g__Clostridium_sensu_stricto_1 | 1        | 0.00 |
| b0cc6e3b244191a<br>b1357fe19e1fc9a<br>2e | V3V4 |                                                                                                                           | d__Bacteria;p__Firmicutes;c__Bacilli;o__Staphylococcales;f__Staphylococcaceae;g__Staphylococcus           | 1        | 0.00 |

|                                          |      |                                                                                                                                                          |                                                                                                                                |    |      |
|------------------------------------------|------|----------------------------------------------------------------------------------------------------------------------------------------------------------|--------------------------------------------------------------------------------------------------------------------------------|----|------|
| 492ed26e8fe4359<br>d9dd1c133c3e7b<br>3cb | V3V4 |                                                                                                                                                          |                                                                                                                                | 1  | 0.00 |
| cb93c047af2ba2e<br>33389d8b998a28<br>150 | V3V4 |                                                                                                                                                          | d__Bacteria;p__Actinobacteriota;c__<br>Actinobacteria;o__Actinomycetales;f__<br>Actinomycetaceae;g__Actinomyces                | 10 | 0.01 |
| 5283f476090a024<br>8b7f6fffc1348a8e<br>8 | V3V4 |                                                                                                                                                          | d__Bacteria;p__Actinobacteriota;c__<br>Actinobacteria;o__Bifidobacteriales;f__<br>Bifidobacteriaceae;g__Bifidobacterium        | 40 | 0.04 |
| 90a6a6f14d4d80<br>c00fa17c150ca9e<br>bce | V3V4 | d__Bacteria;p__Firmicutes;c__Bacilli;<br>o__Lactobacillales;f__Lactobacillacea<br>e;g__Lactobacillus;s__mouse_gut                                        | d__Bacteria;p__Firmicutes;c__Bacilli;<br>o__Lactobacillales;f__Lactobacillacea<br>e;g__Lactobacillus                           | 2  | 0.00 |
| fa7f3fe11e36c4b6<br>d30ae148713ff05<br>f | V3V4 |                                                                                                                                                          | d__Bacteria;p__Firmicutes;c__Clostridia;o__<br>Peptostreptococcales-Tissierellales;f__<br>Peptostreptococcaceae;g__Romboutsia  | 9  | 0.01 |
| f74124cf2698857f<br>11924bc4cc47b6c<br>2 | V3V4 | d__Bacteria;p__Proteobacteria;c__Gammaproteobacteria;o__<br>Enterobacterales;f__Enterobacteriaceae;g__<br>Escherichia-Shigella;s__uncultured_Escherichia | d__Bacteria;p__Proteobacteria;c__Gammaproteobacteria;o__<br>Enterobacterales;f__Enterobacteriaceae;g__<br>Escherichia-Shigella | 9  | 0.01 |
| 44163af77873c2c<br>3b907dd79b05e2<br>f0f | V3V4 |                                                                                                                                                          | d__Bacteria;p__Proteobacteria;c__Gammaproteobacteria;o__<br>Pseudomonadales;f__Pseudomonadaceae;g__Pseudomonas                 | 10 | 0.01 |
| 397d12199a2dee<br>22c6c3cb0607d4<br>b244 | V3V4 |                                                                                                                                                          | d__Bacteria;p__Firmicutes;c__Bacilli;o__<br>Lactobacillales;f__Lactobacillacea<br>e;g__Lactobacillus                           | 1  | 0.00 |
| ee63c66fa9845ff0<br>18f2385400ffac1c     | V3V4 | d__Bacteria;p__Firmicutes;c__Bacilli;o__<br>Lactobacillales;f__Streptococcaceae;g__<br>Streptococcus;s__Streptococcus_trogloodytae                       | d__Bacteria;p__Firmicutes;c__Bacilli;o__<br>Lactobacillales;f__Streptococcaceae;g__<br>Streptococcus                           | 2  | 0.00 |
| 4498526ac722cce<br>4d07cae5cbaca12<br>24 | V3V4 |                                                                                                                                                          | d__Bacteria;p__Firmicutes;c__Bacilli;o__<br>Lactobacillales;f__Enterococcaceae;g__<br>Enterococcus                             | 2  | 0.00 |
| 30552d6e490547<br>2fe90f1d1ea2584<br>c57 | V3V4 |                                                                                                                                                          | d__Bacteria;p__Firmicutes;c__Bacilli;o__<br>Lactobacillales;f__Streptococcaceae;g__<br>Streptococcus                           | 4  | 0.00 |
| 2e081b7ff660c34<br>d0503c723de0faa<br>b3 | V3V4 |                                                                                                                                                          | d__Bacteria;p__Proteobacteria;c__Gammaproteobacteria;o__<br>Pseudomonadales;f__Moraxellaceae;g__Acinetobacter                  | 3  | 0.00 |

|                                          |      |                                                                                                           |                                                                                                                        |   |      |
|------------------------------------------|------|-----------------------------------------------------------------------------------------------------------|------------------------------------------------------------------------------------------------------------------------|---|------|
| abce05ed9ee1d3<br>89232f2a3ea3bc9<br>657 | V3V4 |                                                                                                           | d__Bacteria;p__Firmicutes;c__Clostridia;o__Clostridiales;f__Clostridiaceae;g__Clostridium_sensu_stricto_1              | 2 | 0.00 |
| 7be95baaddca16<br>3f1c6b316ba8621<br>9ee | V3V4 |                                                                                                           | d__Bacteria;p__Proteobacteria;c__Gammaproteobacteria;o__Enterobacterales;f__Enterobacteriaceae;g__Escherichia-Shigella | 2 | 0.00 |
| 7dd0c4a5fa6311<br>8d9da0fe733dbe<br>7f5c | V3V4 |                                                                                                           | d__Bacteria;p__Firmicutes;c__Bacilli;o__Lactobacillales;f__Lactobacillaceae;g__Lactobacillus                           | 1 | 0.00 |
| 3f012a293d1c7f7<br>075486004465ca1<br>56 | V3V4 |                                                                                                           | d__Bacteria;p__Firmicutes;c__Bacilli;o__Lactobacillales;f__Lactobacillaceae;g__Lactobacillus                           | 1 | 0.00 |
| b348310b9ad541<br>3880fcab00d56e2<br>494 | V3V4 | d__Bacteria;p__Firmicutes;c__Bacilli;o__Lactobacillales;f__Lactobacillaceae;g__Lactobacillus;s__mouse_gut | d__Bacteria;p__Firmicutes;c__Bacilli;o__Lactobacillales;f__Lactobacillaceae;g__Lactobacillus                           | 2 | 0.00 |
| c92d34b04f93ee7<br>6340cf1dfd390ca<br>d3 | V3V4 |                                                                                                           | d__Bacteria;p__Firmicutes;c__Bacilli;o__Lactobacillales;f__Lactobacillaceae;g__Lactobacillus                           | 2 | 0.00 |
| 8176a592411252<br>53f19efb1a2a102<br>5a7 | V3V4 |                                                                                                           | d__Bacteria;p__Firmicutes;c__Clostridia;o__Clostridiales;f__Clostridiaceae;g__Clostridium_sensu_stricto_1              | 1 | 0.00 |
| f32c3098ccb00b2<br>74be15992dbf7c1<br>e3 | V3V4 |                                                                                                           |                                                                                                                        | 1 | 0.00 |
| 1cfaf7686133c22<br>ec3308efb96e0a2<br>2a | V3V4 |                                                                                                           |                                                                                                                        | 2 | 0.00 |
| 3829fc0b69d7943<br>9dc17485f0ec03ff<br>f | V3V4 |                                                                                                           | d__Bacteria;p__Bacteroidota;c__Bacteroidia;o__Bacteroidales;f__Bacteroidaceae;g__Bacteroides                           | 1 | 0.00 |
| 5c666123cdf2417<br>dcff3c0ce45e894<br>36 | V3V4 |                                                                                                           | d__Bacteria;p__Proteobacteria;c__Gammaproteobacteria;o__Burkholderiales;f__Neisseriaceae;g__Neisseria                  | 1 | 0.00 |
| 381b667dc5dd68<br>c1fbe51b785562c<br>860 | V3V4 |                                                                                                           | d__Bacteria;p__Bacteroidota;c__Bacteroidia;o__Bacteroidales;f__Bacteroidaceae;g__Bacteroides                           | 5 | 0.01 |
| e7988e34895ba1<br>648612e0e677fc9<br>e4e | V3V4 |                                                                                                           |                                                                                                                        | 1 | 0.00 |
| 0e157a51af08007<br>fc87a7c2925c674<br>f1 | V3V4 | d__Bacteria;p__Proteobacteria;c__Gammaproteobacteria;o__Enterobacterales;f__Enterobacteriaceae;g__Escher  | d__Bacteria;p__Proteobacteria;c__Gammaproteobacteria;o__Enterobacter                                                   | 1 | 0.00 |

|                                  |      |                                                                                                                      |                                                                                                                         |    |      |
|----------------------------------|------|----------------------------------------------------------------------------------------------------------------------|-------------------------------------------------------------------------------------------------------------------------|----|------|
|                                  |      | ichia-Shigella;s__uncultured_Pantoea                                                                                 | ales;f__Enterobacteriaceae;g__Escherichia-Shigella                                                                      |    |      |
| 76444b43bd86d5ee5f46904d49c9754d | V3V4 |                                                                                                                      | d__Bacteria;p__Actinobacteriota;c__Actinobacteria;o__Bifidobacteriales;f__Bifidobacteriaceae;g__Bifidobacterium         | 19 | 0.02 |
| 78964bebb9fd2e86a40c9ed3585969a6 | V3V4 | d__Bacteria;p__Firmicutes;c__Bacilli;o__Lactobacillales;f__Lactobacillaceae;g__Lactobacillus;s__uncultured_bacterium | d__Bacteria;p__Firmicutes;c__Bacilli;o__Lactobacillales;f__Lactobacillaceae;g__Lactobacillus                            | 1  | 0.00 |
| e07ea05065633374ef3159033952de15 | V3V4 |                                                                                                                      |                                                                                                                         | 2  | 0.00 |
| c1a575ede20550366883decab3d0b7e1 | V3V4 |                                                                                                                      |                                                                                                                         | 16 | 0.02 |
| 5848a447494c6f23aa875baa5de5a8da | V3V4 |                                                                                                                      | d__Bacteria;p__Firmicutes;c__Clostridia;o__Clostridiales;f__Clostridiaceae;g__Clostridium_sensu_stricto_1               | 2  | 0.00 |
| 1d927a61fda6a288d40c2479c1da7b53 | V3V4 |                                                                                                                      | d__Bacteria;p__Proteobacteria;c__Gammaproteobacteria;o__Enterobacteriales;f__Enterobacteriaceae;g__Escherichia-Shigella | 3  | 0.00 |
| 699e0f7469c165b701834385f9a13ed7 | V3V4 |                                                                                                                      | d__Bacteria;p__Firmicutes;c__Bacilli;o__Staphylococcales;f__Staphylococcaceae;g__Staphylococcus                         | 1  | 0.00 |
| b468694797c5990818fe1cf509f2f807 | V3V4 |                                                                                                                      | d__Bacteria;p__Proteobacteria;c__Gammaproteobacteria;o__Pseudomonadales;f__Pseudomonadaceae;g__Pseudomonas              | 4  | 0.00 |
| 08bc05c4756c28aca9d5e9f1dc5901ad | V3V4 |                                                                                                                      |                                                                                                                         | 1  | 0.00 |
| 04a6e1bfd2e94a99f1bd4c7f4f5b7017 | V3V4 |                                                                                                                      |                                                                                                                         | 3  | 0.00 |
| 4c7b75d43255eed2661601ed23c87123 | V3V4 |                                                                                                                      |                                                                                                                         | 3  | 0.00 |
| b96951bab7f5282a3531696b0e3ec620 | V3V4 |                                                                                                                      | d__Bacteria;p__Firmicutes;c__Bacilli;o__Lactobacillales;f__Lactobacillaceae;g__Lactobacillus                            | 1  | 0.00 |

|                                          |      |                                                                                                                          |                                                                                                                        |    |      |
|------------------------------------------|------|--------------------------------------------------------------------------------------------------------------------------|------------------------------------------------------------------------------------------------------------------------|----|------|
| 278f5855ed26318<br>212ca668522a925<br>c0 | V3V4 |                                                                                                                          | d__Bacteria;p__Actinobacteriota;c__<br>Actinobacteria;o__Actinomycetales;f__<br>Actinomycetaceae;g__Actinomyces        | 7  | 0.01 |
| 1070c4298b1ec67<br>0ca36faf1e6acca4<br>0 | V3V4 |                                                                                                                          | d__Bacteria;p__Proteobacteria;c__Gammaproteobacteria;o__Burkholderiales;f__Neisseriaceae;g__Neisseria                  | 1  | 0.00 |
| 1f68bc4e3aeeb65<br>d48f63fbef319adae     | V3V4 |                                                                                                                          | d__Bacteria;p__Bacteroidota;c__Bacteroidia;o__Bacteroidales;f__Bacteroidaceae;g__Bacteroides                           | 1  | 0.00 |
| 41fc41da8fe491d<br>0ab4515cc43afd5<br>8e | V3V4 |                                                                                                                          | d__Bacteria;p__Proteobacteria;c__Gammaproteobacteria;o__Enterobacterales;f__Enterobacteriaceae;g__Escherichia-Shigella | 15 | 0.02 |
| bd2bc954f821d9<br>8b470847b8a594<br>78b0 | V3V4 |                                                                                                                          | d__Bacteria;p__Firmicutes;c__Bacilli;o__Lactobacillales;f__Lactobacillaceae;g__Lactobacillus                           | 1  | 0.00 |
| a1d3cc08120790<br>0015d39f5b81ecd35      | V3V4 | d__Bacteria;p__Firmicutes;c__Bacilli;o__Lactobacillales;f__Streptococcaceae;g__Streptococcus;s__Streptococcus_trogodytae | d__Bacteria;p__Firmicutes;c__Bacilli;o__Lactobacillales;f__Streptococcaceae;g__Streptococcus                           | 1  | 0.00 |
| 7129605bb839e8<br>e5c432cf15aa68c<br>864 | V3V4 |                                                                                                                          | d__Bacteria;p__Firmicutes;c__Bacilli;o__Lactobacillales;f__Enterococcaceae;g__Enterococcus                             | 1  | 0.00 |
| b3289bc3fc34222<br>3a3882db9a80d8<br>8c6 | V3V4 |                                                                                                                          | d__Bacteria;p__Actinobacteriota;c__Actinobacteria;o__Bifidobacteriales;f__Bifidobacteriaceae;g__Bifidobacterium        | 14 | 0.01 |
| fd63fd7ea904a2c<br>74a93909008964<br>afb | V3V4 |                                                                                                                          |                                                                                                                        | 1  | 0.00 |
| 0aaa2ce281156ce<br>dcc1dba12c7fb0<br>b43 | V3V4 |                                                                                                                          | d__Bacteria;p__Actinobacteriota;c__Actinobacteria;o__Actinomycetales;f__Actinomycetaceae;g__Actinomyces                | 4  | 0.00 |
| 656a3f9265f027e<br>edeae38b5a655f0<br>57 | V3V4 | d__Bacteria;p__Bacteroidota;c__Bacteroidia;o__Bacteroidales;f__Bacteroidaceae;g__Bacteroides;s__Bacteroides_vulgatus     | d__Bacteria;p__Bacteroidota;c__Bacteroidia;o__Bacteroidales;f__Bacteroidaceae;g__Bacteroides                           | 1  | 0.00 |
| bcc1f1c4c18982e<br>2887807cbe6e1b<br>0fc | V3V4 |                                                                                                                          |                                                                                                                        | 2  | 0.00 |



|                                          |      |                                                                                                                                                             |                                                                                                                                    |   |      |
|------------------------------------------|------|-------------------------------------------------------------------------------------------------------------------------------------------------------------|------------------------------------------------------------------------------------------------------------------------------------|---|------|
| 26055d990cb566<br>310cc60ca222661<br>e9c | V3V4 |                                                                                                                                                             | d__Bacteria;p__Firmicutes;c__Bacilli;<br>o__Lactobacillales;f__Streptococcace<br>ae;g__Streptococcus                               | 1 | 0.00 |
| 8b1242f5d16dcc<br>a61bf8d5c4ce68b<br>69c | V3V4 |                                                                                                                                                             | d__Bacteria;p__Firmicutes;c__Bacilli;<br>o__Staphylococcales;f__Staphylococ<br>caceae;g__Staphylococcus                            | 3 | 0.00 |
| 40c09ab1cbda98<br>0dbfdbaeff778e1<br>cc1 | V3V4 | d__Bacteria;p__Firmicutes;c__Clostr<br>idia;o__Peptostreptococcales-<br>Tissierellales;f__Anaerovoracaceae;g<br>__Mogibacterium;s__uncultured_ba<br>cterium | d__Bacteria;p__Firmicutes;c__Clostr<br>idia;o__Peptostreptococcales-<br>Tissierellales;f__Anaerovoracaceae;g<br>__Mogibacterium    | 4 | 0.00 |
| a17b3f33f0dd27<br>b289b0f9ef201f5<br>3c5 | V3V4 |                                                                                                                                                             | d__Bacteria;p__Deinococcota;c__Dei<br>nococci;o__Deinococcales;f__Deinoc<br>occaceae;g__Deinococcus                                | 2 | 0.00 |
| 68ffc7181ac528d<br>49f7458b4547eb4<br>7b | V3V4 |                                                                                                                                                             |                                                                                                                                    | 5 | 0.01 |
| f91f431a88c3772<br>30dd1c8bb79703<br>853 | V3V4 |                                                                                                                                                             | d__Bacteria;p__Proteobacteria;c__Ga<br>mmaproteobacteria;o__Burkholderia<br>les;f__Neisseriaceae;g__Neisseria                      | 1 | 0.00 |
| b0060cc6b7ce620<br>870420f8b3fa3b6<br>c1 | V3V4 |                                                                                                                                                             | d__Bacteria;p__Proteobacteria;c__Ga<br>mmaproteobacteria;o__Enterobacter<br>ales;f__Enterobacteriaceae;g__Escher<br>ichia-Shigella | 1 | 0.00 |
| 08dfad997477a5<br>742bc80007f5277<br>ef8 | V3V4 |                                                                                                                                                             | d__Bacteria;p__Firmicutes;c__Bacilli;<br>o__Lactobacillales;f__Streptococcace<br>ae;g__Streptococcus                               | 4 | 0.00 |
| 4a8f3208e638a1c<br>148bb51ecbb6ef1<br>8d | V3V4 |                                                                                                                                                             |                                                                                                                                    | 4 | 0.00 |
| 9089af94287bb71<br>026b03ad629aac<br>9a0 | V3V4 | d__Bacteria;p__Proteobacteria;c__Ga<br>mmaproteobacteria;o__Pseudomona<br>dales;f__Pseudomonadaceae;g__Pse<br>udomonas;s__uncultured_Marinoba<br>cter       | d__Bacteria;p__Proteobacteria;c__Ga<br>mmaproteobacteria;o__Pseudomona<br>dales;f__Pseudomonadaceae;g__Pse<br>udomonas             | 2 | 0.00 |
| 7d0c9763930875<br>4ea15f6592b87cb<br>884 | V3V4 |                                                                                                                                                             | d__Bacteria;p__Firmicutes;c__Bacilli;<br>o__Bacillales;f__Bacillaceae;g__Bacill<br>us                                              | 4 | 0.00 |
| 52f955461f86ad8<br>83c55d8a3e8202<br>279 | V3V4 |                                                                                                                                                             | d__Bacteria;p__Proteobacteria;c__Ga<br>mmaproteobacteria;o__Pseudomona<br>dales;f__Moraxellaceae;g__Acinetob<br>acter              | 5 | 0.01 |

|                                  |      |                                                                                                                                              |    |      |
|----------------------------------|------|----------------------------------------------------------------------------------------------------------------------------------------------|----|------|
| c2b613466af9051a1e76bf383e85e2cf | V3V4 | d__Bacteria;p__Firmicutes;c__Bacilli;o__Staphylococcales;f__Staphylococcaceae;g__Staphylococcus                                              | 3  | 0.00 |
| c646867128acf18b40a0553724e2d3d9 | V3V4 | d__Bacteria;p__Firmicutes;c__Bacilli;o__Lactobacillales;f__Lactobacillaceae;g__Lactobacillus                                                 | 1  | 0.00 |
| c2e4ed60db611124a48fcec819041b   | V3V4 | d__Bacteria;p__Proteobacteria;c__Gammaproteobacteria;o__Pseudomonadales;f__Pseudomonadaceae;g__Pseudomonas                                   | 16 | 0.02 |
| edd03326781345dce17c282af79662d9 | V3V4 | d__Bacteria;p__Firmicutes;c__Bacilli;o__Lactobacillales;f__Lactobacillaceae;g__Lactobacillus                                                 | 1  | 0.00 |
| 03359371173b50f5325d305f0cf4ac20 | V3V4 | d__Bacteria;p__Actinobacteriota;c__Actinobacteria;o__Propionibacteriales;f__Propionibacteriaceae;g__Cutibacterium                            | 4  | 0.00 |
| 11e8bc474b260bc0d712df6ea46b5199 | V3V4 |                                                                                                                                              | 4  | 0.00 |
| 090b5dca9050c83d67c1b7482f9ec905 | V3V4 | d__Bacteria;p__Proteobacteria;c__Gammaproteobacteria;o__Pseudomonadales;f__Pseudomonadaceae;g__Pseudomonas                                   | 4  | 0.00 |
| 9713c18671402dea22a8cf2aaf4d75b7 | V3V4 | d__Bacteria;p__Actinobacteriota;c__Actinobacteria;o__Actinomycetales;f__Actinomycetaceae;g__Actinomyces                                      | 9  | 0.01 |
| e63f1461c4c56b18a07fbf6cd5b09142 | V3V4 | d__Bacteria;p__Proteobacteria;c__Gammaproteobacteria;o__Enterobacterales;f__Enterobacteriaceae;g__Escherichia-Shigella;s__Malaclemys_terrapi | 1  | 0.00 |
| 44fe027804a633841108da2a936cf813 | V3V4 |                                                                                                                                              | 1  | 0.00 |
| f16b81eedac66ac1b68662de35eb5f5a | V3V4 | d__Bacteria;p__Firmicutes;c__Bacilli;o__Lactobacillales;f__Streptococcaceae;g__Streptococcus;s__Streptococcus_troglyodytae                   | 2  | 0.00 |
| 7132ebbc3bfce41e701cfe1f86ed45dd | V3V4 | d__Bacteria;p__Firmicutes;c__Bacilli;o__Lactobacillales;f__Lactobacillaceae;g__Lactobacillus;s__uncultured_bacterium                         | 1  | 0.00 |

|                                          |      |                                                                                                                          |                                                                                                                        |   |      |
|------------------------------------------|------|--------------------------------------------------------------------------------------------------------------------------|------------------------------------------------------------------------------------------------------------------------|---|------|
| dc2ae076f875112<br>08642bf8508d3e9<br>04 | V3V4 |                                                                                                                          |                                                                                                                        | 1 | 0.00 |
| d9a9cba2990f6a6<br>c154303d3ec7092<br>05 | V3V4 |                                                                                                                          | d__Bacteria;p__Proteobacteria;c__Gammaproteobacteria;o__Enterobacterales;f__Enterobacteriaceae;g__Escherichia-Shigella | 1 | 0.00 |
| f2ed2c40a65cdcd<br>33edffde8adbea<br>b62 | V3V4 |                                                                                                                          | d__Bacteria;p__Actinobacteriota;c__Actinobacteria;o__Bifidobacteriales;f__Bifidobacteriaceae;g__Bifidobacterium        | 5 | 0.01 |
| 52f23ca04c38e4e<br>75a6c8391c1a5cc<br>57 | V3V4 |                                                                                                                          | d__Bacteria;p__Proteobacteria;c__Alphaproteobacteria;o__Rhodobacterales;f__Rhodobacteraceae;g__Rhodobacter             | 2 | 0.00 |
| 88a0532c9cd77a<br>5109be4a3c8136<br>d363 | V3V4 | d__Bacteria;p__Deinococcota;c__Deinococci;o__Deinococcales;f__Deinococcaceae;g__Deinococcus;s__Deinococcus_radiodurans   | d__Bacteria;p__Deinococcota;c__Deinococci;o__Deinococcales;f__Deinococcaceae;g__Deinococcus                            | 7 | 0.01 |
| c07ec260b3193f7<br>708e297285494e5<br>49 | V3V4 |                                                                                                                          | d__Bacteria;p__Firmicutes;c__Clostridia;o__Clostridiales;f__Clostridiaceae;g__Clostridium_sensu_stricto_1              | 1 | 0.00 |
| fd6d065f1839c95<br>af0c64f26f383a16<br>c | V3V4 | d__Bacteria;p__Firmicutes;c__Bacilli;o__Lactobacillales;f__Lactobacillaceae;g__Lactobacillus;s__mouse_gut                | d__Bacteria;p__Firmicutes;c__Bacilli;o__Lactobacillales;f__Lactobacillaceae;g__Lactobacillus                           | 2 | 0.00 |
| 50fdd882f9a2f68<br>6b0bb371512ce5<br>c56 | V3V4 |                                                                                                                          |                                                                                                                        | 9 | 0.01 |
| 183d55896ac0ec4<br>15369542ee7bc7<br>d09 | V3V4 | d__Bacteria;p__Firmicutes;c__Bacilli;o__Lactobacillales;f__Streptococcaceae;g__Streptococcus;s__Streptococcus_trogodytae | d__Bacteria;p__Firmicutes;c__Bacilli;o__Lactobacillales;f__Streptococcaceae;g__Streptococcus                           | 3 | 0.00 |
| b1c1e045e4aa3c0<br>70d1ca97bb34c3<br>77f | V3V4 |                                                                                                                          |                                                                                                                        | 1 | 0.00 |
| f3f6af8f3182835c<br>90c5712e22748cc<br>b | V3V4 |                                                                                                                          | d__Bacteria;p__Firmicutes;c__Bacilli;o__Staphylococcales;f__Staphylococcaceae;g__Staphylococcus                        | 4 | 0.00 |
| b0f8cd8129d46e<br>d63ef0548638543<br>eaf | V3V4 |                                                                                                                          | d__Bacteria;p__Proteobacteria;c__Gammaproteobacteria;o__Pseudomonadales;f__Moraxellaceae;g__Acinetobacter              | 1 | 0.00 |

|                                          |      |                                                                                                                                       |                                                                                                                   |    |      |
|------------------------------------------|------|---------------------------------------------------------------------------------------------------------------------------------------|-------------------------------------------------------------------------------------------------------------------|----|------|
| 84d98d85677eba<br>c820163018f3b58<br>4b0 | V3V4 |                                                                                                                                       | d__Bacteria;p__Actinobacteriota;c__Actinobacteria;o__Propionibacteriales;f__Propionibacteriaceae;g__Cutibacterium | 1  | 0.00 |
| 532b8c57ef37371<br>3b169f64953ceb7<br>eb | V3V4 |                                                                                                                                       | d__Bacteria;p__Proteobacteria;c__Gammaproteobacteria;o__Pseudomonadales;f__Pseudomonadaceae;g__Pseudomonas        | 1  | 0.00 |
| 4a8150ec3ef5381<br>fe77e67c074d9d9<br>6f | V3V4 | d__Bacteria;p__Proteobacteria;c__Gammaproteobacteria;o__Pseudomonadales;f__Pseudomonadaceae;g__Pseudomonas;s__uncultured_Marinobacter | d__Bacteria;p__Proteobacteria;c__Gammaproteobacteria;o__Pseudomonadales;f__Pseudomonadaceae;g__Pseudomonas        | 25 | 0.03 |
| 9246824a9517e9<br>d0ff9477deab0a7<br>ac7 | V3V4 |                                                                                                                                       | d__Bacteria;p__Firmicutes;c__Bacilli;o__Bacillales;f__Bacillaceae;g__Bacillus                                     | 2  | 0.00 |
| 314a64ec81e0374<br>28ef7102a4eb0b8<br>da | V3V4 |                                                                                                                                       | d__Bacteria;p__Firmicutes;c__Bacilli;o__Lactobacillales;f__Enterococcaceae;g__Enterococcus                        | 2  | 0.00 |
| a1cc90a21c23d21<br>37d56bb6dc2921<br>c4f | V3V4 |                                                                                                                                       | d__Bacteria;p__Firmicutes;c__Bacilli;o__Lactobacillales;f__Lactobacillaceae;g__Lactobacillus                      | 3  | 0.00 |
| ec9e6cc25798a85<br>f930369b2d00d8<br>2fd | V3V4 |                                                                                                                                       | d__Bacteria;p__Firmicutes;c__Bacilli;o__Lactobacillales;f__Lactobacillaceae;g__Lactobacillus                      | 3  | 0.00 |
| 1168280d13dbc6<br>51e68f5caf1d7bc<br>e82 | V3V4 |                                                                                                                                       | d__Bacteria;p__Firmicutes;c__Bacilli;o__Lactobacillales;f__Lactobacillaceae;g__Lactobacillus                      | 1  | 0.00 |
| 71ae4c3f71b0940<br>1305f029a0f7d46<br>43 | V3V4 |                                                                                                                                       |                                                                                                                   | 2  | 0.00 |
| a9434f8c6924d89<br>46a7a9f473c1780<br>38 | V3V4 |                                                                                                                                       | d__Bacteria;p__Firmicutes;c__Bacilli;o__Lactobacillales;f__Lactobacillaceae;g__Lactobacillus                      | 2  | 0.00 |
| 293a8d61d2ae49<br>3e6eaf6996542ef<br>8a6 | V3V4 |                                                                                                                                       | d__Bacteria;p__Firmicutes;c__Bacilli;o__Lactobacillales;f__Lactobacillaceae;g__Lactobacillus                      | 2  | 0.00 |
| 988117d050ad20<br>3b779ce3d394bf8<br>9a2 | V3V4 |                                                                                                                                       |                                                                                                                   | 3  | 0.00 |
| f05922e3d687273<br>e586590a7e83a10<br>a3 | V3V4 |                                                                                                                                       |                                                                                                                   | 2  | 0.00 |

|                                          |      |                                                                                                                                     |    |      |
|------------------------------------------|------|-------------------------------------------------------------------------------------------------------------------------------------|----|------|
| 967eff4d421800<br>813303a3b0a03a<br>194  | V3V4 | d__Bacteria;p__Firmicutes;c__Bacilli;<br>o__Erysipelotrichales;f__Erysipelotri<br>chaceae;g__Holdemanella                           | 3  | 0.00 |
| f12f13f1a547f87a<br>b5808f9626d2f21<br>6 | V3V4 | d__Bacteria;p__Firmicutes;c__Clostr<br>idia;o__Lachnospirales;f__Lachnosp<br>iraceae;g__Blautia                                     | 12 | 0.01 |
| 3040e0c8ab58060<br>a4e34cc39ef03da<br>52 | V3V4 | d__Bacteria;p__Actinobacteriota;c__<br>Actinobacteria;o__Actinomycetales;f__<br>Actinomycetaceae;g__Actinomyce<br>s                 | 1  | 0.00 |
| 8454e15db29796<br>8395307aef9bf3f<br>de4 | V3V4 | d__Bacteria;p__Firmicutes;c__Bacilli;<br>o__Staphylococcales;f__Staphylococ<br>caceae;g__Staphylococcus                             | 1  | 0.00 |
| 17ca9aee028bd1<br>0cc2bd929cbd0c<br>54fb | V3V4 | d__Bacteria;p__Firmicutes;c__Bacilli;<br>o__Lactobacillales;f__Lactobacillacea<br>e;g__Lactobacillus                                | 1  | 0.00 |
| 233af22eb710eb9<br>ddd3e0c2178da7<br>f39 | V3V4 | d__Bacteria;p__Proteobacteria;c__Ga<br>mmaproteobacteria;o__Enterobacter<br>iales;f__Enterobacteriaceae;g__Escher<br>ichia-Shigella | 3  | 0.00 |
| 9c1d5c5045803e1<br>5a96a235f8de9dc<br>24 | V3V4 | d__Bacteria;p__Actinobacteriota;c__<br>Actinobacteria;o__Propionibacteriale<br>s;f__Propionibacteriaceae;g__Cutiba<br>cterium       | 3  | 0.00 |
| 55ecec4f9cd6b3f<br>10605efc76a6823<br>dc | V3V4 | d__Bacteria;p__Firmicutes;c__Bacilli;<br>o__Lactobacillales;f__Enterococcacea<br>e;g__Enterococcus                                  | 2  | 0.00 |
| 488a8665cc64ed5<br>fba5a8685d8df50<br>7a | V3V4 |                                                                                                                                     | 4  | 0.00 |
| 6023071f6f9e948<br>bed1c969f0601d<br>684 | V3V4 | d__Bacteria;p__Firmicutes;c__Bacilli;<br>o__Lactobacillales;f__Enterococcacea<br>e;g__Enterococcus                                  | 4  | 0.00 |
| 4be7df120f0d1c5<br>c7c0e6079210d60<br>42 | V3V4 | d__Bacteria;p__Proteobacteria;c__Al<br>phaproteobacteria;o__Rhodobacteral<br>es;f__Rhodobacteraceae;g__Rhodoba<br>cter              | 1  | 0.00 |
| 3a493d430b6c9e<br>bfc351bdf059799<br>e78 | V3V4 | d__Bacteria;p__Firmicutes;c__Bacilli;<br>o__Lactobacillales;f__Lactobacillacea<br>e;g__Lactobacillus                                | 2  | 0.00 |
| ce388ec374f5d25<br>2945e6b8743ee9<br>0c0 | V3V4 | d__Bacteria;p__Deinococcota;c__Dei<br>nococci;o__Deinococcales;f__Deinoc<br>occaceae;g__Deinococcus                                 | 5  | 0.01 |

|                                          |      |                                                                                                                                                        |                                                                                                                                    |    |      |
|------------------------------------------|------|--------------------------------------------------------------------------------------------------------------------------------------------------------|------------------------------------------------------------------------------------------------------------------------------------|----|------|
| fa91d0754e33b45<br>a3cda25ae630c7e<br>b1 | V3V4 |                                                                                                                                                        | d__Bacteria;p__Actinobacteriota;c__<br>Actinobacteria;o__Propionibacteriale<br>s;f__Propionibacteriaceae;g__Cutiba<br>cterium      | 1  | 0.00 |
| 5ef26d58b743e2c<br>2b49b51badcbf8<br>900 | V3V4 |                                                                                                                                                        |                                                                                                                                    | 4  | 0.00 |
| 9e10aab3874583<br>d56021f515a5c4c<br>bf4 | V3V4 |                                                                                                                                                        | d__Bacteria;p__Firmicutes;c__Clostr<br>idia;o__Clostridiales;f__Clostridiace<br>ae;g__Clostridium_sensu_stricto_1                  | 1  | 0.00 |
| 0253bd5f7388df3<br>5c5f43b2d85b26<br>7fa | V3V4 |                                                                                                                                                        |                                                                                                                                    | 1  | 0.00 |
| 3942209bbeeb67<br>2021ff36f82794ae<br>6e | V3V4 | d__Bacteria;p__Campilobacterota;c__<br>_Campylobacteria;o__Campylobacte<br>rales;f__Helicobacteraceae;g__Helico<br>bacter;s__uncultured_Helicobacter   | d__Bacteria;p__Campilobacterota;c__<br>_Campylobacteria;o__Campylobacte<br>rales;f__Helicobacteraceae;g__Helico<br>bacter          | 4  | 0.00 |
| e0c987cbfa9d14a<br>e13e9cf00023dd2<br>3b | V3V4 |                                                                                                                                                        |                                                                                                                                    | 6  | 0.01 |
| cb81aae5ff4960b<br>2c64970d7c8ef0c<br>b1 | V3V4 |                                                                                                                                                        |                                                                                                                                    | 2  | 0.00 |
| 1f9d41814f8c483<br>2104632e6be3ad<br>d7d | V3V4 |                                                                                                                                                        | d__Bacteria;p__Proteobacteria;c__Ga<br>mmaproteobacteria;o__Enterobacter<br>ales;f__Enterobacteriaceae;g__Escher<br>ichia-Shigella | 12 | 0.01 |
| de6c5767675dae<br>a2809d212ff3e6d<br>b03 | V3V4 |                                                                                                                                                        |                                                                                                                                    | 2  | 0.00 |
| acab893a2330eff<br>acc9f74ae5a5994<br>4f | V3V4 |                                                                                                                                                        | d__Bacteria;p__Proteobacteria;c__Ga<br>mmaproteobacteria;o__Burkholderia<br>les;f__Neisseriaceae;g__Neisseria                      | 3  | 0.00 |
| b4393dd2898000<br>d8bf94ad374a84<br>e508 | V3V4 |                                                                                                                                                        | d__Bacteria;p__Firmicutes;c__Bacilli;<br>o__Lactobacillales;f__Lactobacillacea<br>e;g__Lactobacillus                               | 1  | 0.00 |
| 3534d05428b2f9<br>d14741eb884c9a<br>3144 | V3V4 |                                                                                                                                                        | d__Bacteria;p__Actinobacteriota;c__<br>Actinobacteria;o__Propionibacteriale<br>s;f__Propionibacteriaceae;g__Cutiba<br>cterium      | 1  | 0.00 |
| 6b1e9704d9c7b3<br>dcfcfdb6c995e6<br>4d8  | V3V4 | d__Bacteria;p__Proteobacteria;c__Ga<br>mmaproteobacteria;o__Enterobacter<br>ales;f__Enterobacteriaceae;g__Escher<br>ichia-Shigella;s__Streptomyces_sp. | d__Bacteria;p__Proteobacteria;c__Ga<br>mmaproteobacteria;o__Enterobacter<br>ales;f__Enterobacteriaceae;g__Escher<br>ichia-Shigella | 4  | 0.00 |

|                                          |      |                                                                                                                        |    |      |
|------------------------------------------|------|------------------------------------------------------------------------------------------------------------------------|----|------|
| 36b49d1cdea366<br>09242c463e217b7<br>880 | V3V4 | d__Bacteria;p__Actinobacteriota;c__Actinobacteria;o__Propionibacteriales;f__Propionibacteriaceae;g__Cutibacterium      | 7  | 0.01 |
| 03b94133f169109<br>cf1d00b403c5f09<br>89 | V3V4 | d__Bacteria;p__Actinobacteriota;c__Actinobacteria;o__Bifidobacteriales;f__Bifidobacteriaceae;g__Bifidobacterium        | 7  | 0.01 |
| 9674fc3295b7329<br>cfd903d5da7838<br>ee  | V3V4 | d__Bacteria;p__Proteobacteria;c__Gammaproteobacteria;o__Pseudomonadales;f__Pseudomonadaceae;g__Pseudomonas             | 1  | 0.00 |
| 1face95889737ae<br>c126a40991f8032<br>ef | V3V4 | d__Bacteria;p__Actinobacteriota;c__Actinobacteria;o__Bifidobacteriales;f__Bifidobacteriaceae;g__Bifidobacterium        | 1  | 0.00 |
| 06ec07e2478fcd1<br>a6a1420ba11e83<br>e3c | V3V4 | d__Bacteria;p__Proteobacteria;c__Gammaproteobacteria;o__Enterobacterales;f__Enterobacteriaceae;g__Escherichia-Shigella | 4  | 0.00 |
| 63c4d6d4257da3<br>014c495f2543005<br>3a5 | V3V4 | d__Bacteria;p__Proteobacteria;c__Gammaproteobacteria;o__Enterobacterales;f__Enterobacteriaceae;g__Escherichia-Shigella | 2  | 0.00 |
| 8fafdc7828b7257<br>1545121e1f3d36a<br>36 | V3V4 | d__Bacteria;p__Proteobacteria;c__Gammaproteobacteria;o__Pseudomonadales;f__Pseudomonadaceae;g__Pseudomonas             | 10 | 0.01 |
| 9fbc75ff0f6bf962<br>fdbf13b85550324<br>1 | V3V4 | d__Bacteria;p__Actinobacteriota;c__Actinobacteria;o__Bifidobacteriales;f__Bifidobacteriaceae;g__Bifidobacterium        | 3  | 0.00 |
| 007a2dac44d387<br>9720067e0521158<br>cf0 | V3V4 | d__Bacteria;p__Firmicutes;c__Bacilli;o__Lactobacillales;f__Enterococcaceae;g__Enterococcus                             | 3  | 0.00 |
| 27ed56bde0d423<br>5bf1f6a57e9da3e<br>72c | V3V4 | d__Bacteria;p__Deinococcota;c__Deinococchi;o__Deinococcales;f__Deinococcaceae;g__Deinococcus                           | 3  | 0.00 |
| 70e63d68330c32<br>81404f22001f081<br>c99 | V3V4 | d__Bacteria;p__Proteobacteria;c__Gammaproteobacteria;o__Pseudomonadales;f__Pseudomonadaceae;g__Pseudomonas             | 6  | 0.01 |

|                                  |                    |        |         |         |      |                                       |                                                                                                                       |                                                                                                                        |          |      |  |
|----------------------------------|--------------------|--------|---------|---------|------|---------------------------------------|-----------------------------------------------------------------------------------------------------------------------|------------------------------------------------------------------------------------------------------------------------|----------|------|--|
| b1b42f4f1c0d778afcd2ceebbbaf5dbc |                    |        |         |         | V3V4 |                                       |                                                                                                                       | d__Bacteria;p__Bacteroidota;c__Bacteroidia;o__Bacteroidales;f__Bacteroidaceae;g__Bacteroides                           | 3        | 0.00 |  |
| 33aea641c7dd0a325acf8de4e821c12d |                    |        |         |         | V3V4 |                                       |                                                                                                                       |                                                                                                                        | 2        | 0.00 |  |
| b7756945b974867c86021564547c2a6d |                    |        |         |         | V3V4 |                                       |                                                                                                                       |                                                                                                                        | 3        | 0.00 |  |
| 48705a13153b62ac0af4ab27b73192e3 |                    |        |         |         | V3V4 |                                       | d__Bacteria;p__Firmicutes;c__Bacilli;o__Lactobacillales;f__Streptococcaceae;g__Streptococcus;s__uncultured_prokaryote | d__Bacteria;p__Firmicutes;c__Bacilli;o__Lactobacillales;f__Streptococcaceae;g__Streptococcus                           | 6        | 0.01 |  |
| 1b5ca727a776fec4cc49a2e3388a7bd5 |                    |        |         |         | V3V4 |                                       |                                                                                                                       |                                                                                                                        | 2        | 0.00 |  |
| a47fbbed7375d0d17895e59409f03a53 |                    |        |         |         | V3V4 |                                       |                                                                                                                       | d__Bacteria;p__Firmicutes;c__Bacilli;o__Lactobacillales;f__Enterococcaceae;g__Enterococcus                             | 1        | 0.00 |  |
| da79262b440ec0361d03c434e6dd7956 |                    |        |         |         | V3V4 |                                       |                                                                                                                       | d__Bacteria;p__Firmicutes;c__Bacilli;o__Lactobacillales;f__Streptococcaceae;g__Streptococcus                           | 1        | 0.00 |  |
| 362e0b0c0223e3f1e0f39abb4f87eb   |                    |        |         |         | V3V4 |                                       |                                                                                                                       | d__Bacteria;p__Proteobacteria;c__Alphaproteobacteria;o__Rhodobacterales;f__Rhodobacteraceae;g__Rhodobacter             | 1        | 0.00 |  |
| d285d1af9dd4fe2762db30c758452a4c |                    |        |         |         | V3V4 |                                       |                                                                                                                       |                                                                                                                        | 2        | 0.00 |  |
| e202f18d818883a9a0e8a8019c46d960 | 1eb3021faaec49c2_1 | 97.196 | 455325  | 455751  | V3V4 | Escherichia_coli_ATCC_700926          | True                                                                                                                  | d__Bacteria;p__Proteobacteria;c__Gammaproteobacteria;o__Enterobacterales;f__Enterobacteriaceae;g__Escherichia-Shigella | 1        | 0.00 |  |
| 5497318e515a8c328a68f95975d9c7d4 | f5bcb58692924cb7_1 | 100    | 1597643 | 1597217 | V3V4 | Staphylococcus_epidermidis_ATCC_12228 | True                                                                                                                  | d__Bacteria;p__Firmicutes;c__Bacilli;o__Staphylococcales;f__Staphylococcaceae;g__Staphylococcus                        | 5.15E+03 | 5.17 |  |
| 2daa31dbdedabfa287858d52c4ade4d7 | f5bcb58692924cb7_1 | 99.063 | 1597643 | 1597217 | V3V4 | Staphylococcus_epidermidis_ATCC_12228 | True                                                                                                                  | d__Bacteria;p__Firmicutes;c__Bacilli;o__Staphylococcales;f__Staphylococcaceae;g__Staphylococcus                        | 10       | 0.01 |  |



|                                          |                            |        |             |             |      |                                                         |      |                                                                                                                                      |                                                                                                                                    |              |      |
|------------------------------------------|----------------------------|--------|-------------|-------------|------|---------------------------------------------------------|------|--------------------------------------------------------------------------------------------------------------------------------------|------------------------------------------------------------------------------------------------------------------------------------|--------------|------|
| d33a6211611cad<br>a51a0eda6d00b3<br>f45f | c45a1c5<br>7adf446<br>0e_2 | 100    | 23603       | 23859       | V3V4 | Bifidobact<br>erium_ado<br>lescentis_<br>ATCC_157<br>03 | True |                                                                                                                                      | d__Bacteria;p__Actinobacteriota;c__<br>Actinobacteria;o__Bifidobacteriales;f<br>__Bifidobacteriaceae;g__Bifidobacter<br>ium        | 31           | 0.03 |
| 9a004eaacc9a867<br>ffef598974a724e2<br>4 | f5bcb58<br>692924c<br>b7_1 | 98.364 | 15976<br>43 | 15972<br>17 | V3V4 | Staphyloc<br>occus_epi<br>dermidis_<br>ATCC_122<br>28   | True |                                                                                                                                      | d__Bacteria;p__Firmicutes;c__Bacilli;<br>o__Staphylococcales;f__Staphylococ<br>caceae;g__Staphylococcus                            | 2            | 0.00 |
| 5c09851da6fa2dc<br>e3f470ae14beeb4<br>d1 | 58ae911<br>973b74ff<br>c_1 | 99.766 | 16666       | 17092       | V3V4 | Streptococ<br>cus_agalac<br>tiae_ATC<br>C_BAA_6<br>11   | True | d__Bacteria;p__Firmicutes;c__Bacilli;<br>o__Lactobacillales;f__Streptococcace<br>ae;g__Streptococcus;s__Streptococcu<br>s_agalactiae | d__Bacteria;p__Firmicutes;c__Bacilli;<br>o__Lactobacillales;f__Streptococcace<br>ae;g__Streptococcus                               | 210          | 0.21 |
| 7aa282961d474a<br>9fe44dea17c37b2<br>cf5 | 58ae911<br>973b74ff<br>c_1 | 99.766 | 16666       | 17092       | V3V4 | Streptococ<br>cus_agalac<br>tiae_ATC<br>C_BAA_6<br>11   | True | d__Bacteria;p__Firmicutes;c__Bacilli;<br>o__Lactobacillales;f__Streptococcace<br>ae;g__Streptococcus;s__Streptococcu<br>s_agalactiae | d__Bacteria;p__Firmicutes;c__Bacilli;<br>o__Lactobacillales;f__Streptococcace<br>ae;g__Streptococcus                               | 1            | 0.00 |
| ae724118f1bdef6<br>e863be0561de2a<br>aff | 1eb3021<br>faaec49c<br>2_1 | 99.766 | 45532<br>5  | 45575<br>1  | V3V4 | Escherichi<br>a_coli_AT<br>CC_70092<br>6                | True |                                                                                                                                      | d__Bacteria;p__Proteobacteria;c__Ga<br>mmaproteobacteria;o__Enterobacter<br>ales;f__Enterobacteriaceae;g__Escher<br>ichia-Shigella | 33           | 0.03 |
| 9a645346307544<br>8b4ef5e1b93fe2e<br>362 | 5964adb<br>8d0df4f<br>de_1 | 99.766 | 47782<br>9  | 47825<br>5  | V3V4 | Lactobacill<br>us_gasseri<br>_ATCC_33<br>323            | True | d__Bacteria;p__Firmicutes;c__Bacilli;<br>o__Lactobacillales;f__Lactobacillacea<br>e;g__Lactobacillus;s__Lactobacillus_<br>gasseri    | d__Bacteria;p__Firmicutes;c__Bacilli;<br>o__Lactobacillales;f__Lactobacillacea<br>e;g__Lactobacillus                               | 2070         | 2.08 |
| 88de790328dd10<br>b3ebad7cb963d1<br>7770 | adb6d5<br>13b7374<br>f84_1 | 98.444 | 17219       | 17474       | V3V4 | Streptococ<br>cus_muta<br>ns_ATCC_<br>700610            | True |                                                                                                                                      | d__Bacteria;p__Firmicutes;c__Bacilli;<br>o__Lactobacillales;f__Streptococcace<br>ae;g__Streptococcus                               | 2            | 0.00 |
| cb9c3959a2d40c<br>bc54a6fb9714c88<br>1ca | 5964adb<br>8d0df4f<br>de_1 | 99.766 | 47782<br>9  | 47825<br>5  | V3V4 | Lactobacill<br>us_gasseri<br>_ATCC_33<br>323            | True | d__Bacteria;p__Firmicutes;c__Bacilli;<br>o__Lactobacillales;f__Lactobacillacea<br>e;g__Lactobacillus;s__Lactobacillus_<br>gasseri    | d__Bacteria;p__Firmicutes;c__Bacilli;<br>o__Lactobacillales;f__Lactobacillacea<br>e;g__Lactobacillus                               | 5            | 0.01 |
| 51732e34618ee0<br>de8cb1b1d79c58<br>5fc3 | 5964adb<br>8d0df4f<br>de_1 | 98.829 | 47782<br>9  | 47825<br>5  | V3V4 | Lactobacill<br>us_gasseri<br>_ATCC_33<br>323            | True |                                                                                                                                      | d__Bacteria;p__Firmicutes;c__Bacilli;<br>o__Lactobacillales;f__Lactobacillacea<br>e;g__Lactobacillus                               | 2.00E<br>+00 | 0.00 |
| 24af7433c4486d1<br>fd3fd32423ad69<br>9b5 | 045df7c<br>7cb0f42<br>b5_1 | 99.203 | 12229<br>84 | 12227<br>34 | V3V4 | Neisseria_<br>meningiti<br>dis_ATCC<br>_BAA_335         | True |                                                                                                                                      | d__Bacteria;p__Proteobacteria;c__Ga<br>mmaproteobacteria;o__Burkholderia<br>les;f__Neisseriaceae;g__Neisseria                      | 2            | 0.00 |

|                                  |                        |        |             |             |      |                                         |      |                                                                                                                                |                                                                                                                 |       |       |
|----------------------------------|------------------------|--------|-------------|-------------|------|-----------------------------------------|------|--------------------------------------------------------------------------------------------------------------------------------|-----------------------------------------------------------------------------------------------------------------|-------|-------|
| b6635d67cb594473ddba9f8cfba5d13d | d889f9d<br>d971b473d_1 | 100    | 34787<br>3  | 34745<br>2  | V3V4 | Phocaeicola_vulgatus_ATCC_8482          | True | d__Bacteria;p__Bacteroidota;c__Bacteroidia;o__Bacteroidales;f__Bacteroidaceae;g__Bacteroides;s__Bacteroides_vulgatus           | d__Bacteria;p__Bacteroidota;c__Bacteroidia;o__Bacteroidales;f__Bacteroidaceae;g__Bacteroides                    | 4744  | 4.76  |
| e4c0868fdefcdf2037ab5f7a071e4cc7 | 2b7fa0e1de5f42de_1     | 100    | 18285<br>9  | 18327<br>2  | V3V4 | Deinococcus_radiodurans_ATCC_BAA_816    | True | d__Bacteria;p__Deinococcota;c__Deinococci;o__Deinococcales;f__Deinococcaceae;g__Deinococcus;s__Deinococcus_radiodurans         | d__Bacteria;p__Deinococcota;c__Deinococci;o__Deinococcales;f__Deinococcaceae;g__Deinococcus                     | 2036  | 2.04  |
| 318669d5d926e9b81ca6911da00a14ea | 3042186b85304e8d_1     | 100    | 9691        | 10092       | V3V4 | Clostridium_beijerinckii_ATCC_C_35702   | True |                                                                                                                                | d__Bacteria;p__Firmicutes;c__Clostridia;o__Clostridiales;f__Clostridiaceae;g__Clostridium_sensu_stricto_1       | 12195 | 12.25 |
| 64a7212b599e1f720f712f4a72f567a2 | adb6d513b7374f84_1     | 97.613 | 17048       | 17465       | V3V4 | Streptococcus_mutans_ATCC_700610        | True | d__Bacteria;p__Firmicutes;c__Bacilli;o__Lactobacillales;f__Streptococcaceae;g__Streptococcus;s__Streptococcus_mutans           | d__Bacteria;p__Firmicutes;c__Bacilli;o__Lactobacillales;f__Streptococcaceae;g__Streptococcus                    | 1     | 0.00  |
| b4d126d7b5117251ec9a72501c1093c8 | 5964adb8d0df4fde_1     | 97.658 | 47782<br>9  | 47825<br>5  | V3V4 | Lactobacillus_gasseri_ATCC_33323        | True | d__Bacteria;p__Firmicutes;c__Bacilli;o__Lactobacillales;f__Lactobacillaceae;g__Lactobacillus;s__uncultured_bacterium           | d__Bacteria;p__Firmicutes;c__Bacilli;o__Lactobacillales;f__Lactobacillaceae;g__Lactobacillus                    | 2     | 0.00  |
| 63fcdf02bc7b34ab33308d40414e7307 | d889f9d<br>d971b473d_1 | 99.526 | 34787<br>3  | 34745<br>2  | V3V4 | Phocaeicola_vulgatus_ATCC_8482          | True | d__Bacteria;p__Bacteroidota;c__Bacteroidia;o__Bacteroidales;f__Bacteroidaceae;g__Bacteroides;s__Bacteroides_vulgatus           | d__Bacteria;p__Bacteroidota;c__Bacteroidia;o__Bacteroidales;f__Bacteroidaceae;g__Bacteroides                    | 822   | 0.83  |
| 908e9b387f6b9ce7d3f794e658fba37e | f5bcb58692924cb7_1     | 99.766 | 15976<br>43 | 15972<br>17 | V3V4 | Staphylococcus_epidermidis_ATCC_12228   | True |                                                                                                                                | d__Bacteria;p__Firmicutes;c__Bacilli;o__Staphylococcales;f__Staphylococcaceae;g__Staphylococcus                 | 897   | 0.90  |
| 056129de3ff9eab079fac9ec56181a4a | 2504aeb524e74d25_1     | 100    | 22967<br>3  | 23009<br>4  | V3V4 | Porphyromonas_gingivalis_ATCC_33277     | True | d__Bacteria;p__Bacteroidota;c__Bacteroidia;o__Bacteroidales;f__Porphyromonadaceae;g__Porphyromonas;s__Porphyromonas_gingivalis | d__Bacteria;p__Bacteroidota;c__Bacteroidia;o__Bacteroidales;f__Porphyromonadaceae;g__Porphyromonas              | 6361  | 6.39  |
| afa4f6bdca4c647eb4492953ac855721 | c45a1c57adf4460e_2     | 99.757 | 23449       | 23859       | V3V4 | Bifidobacterium_adolescentis_ATCC_15703 | True |                                                                                                                                | d__Bacteria;p__Actinobacteriota;c__Actinobacteria;o__Bifidobacteriales;f__Bifidobacteriaceae;g__Bifidobacterium | 147   | 0.15  |
| 3f3a0eaeaa9c0690b6ede1b17b4fd8ce | c45a1c57adf4460e_2     | 100    | 23449       | 23859       | V3V4 | Bifidobacterium_adolescentis_           | True | d__Bacteria;p__Actinobacteriota;c__Actinobacteria;o__Bifidobacteriales;f__Bifidobacteriaceae;g__Bifidobacterium                | d__Bacteria;p__Actinobacteriota;c__Actinobacteria;o__Bifidobacteriales;f__Bifidobacteriaceae;g__Bifidobacterium | 3815  | 3.83  |

|                                   |                     |        |         |         |      |                                         |      |                                                                                                                                       |                                                                                                                        |      |      |
|-----------------------------------|---------------------|--------|---------|---------|------|-----------------------------------------|------|---------------------------------------------------------------------------------------------------------------------------------------|------------------------------------------------------------------------------------------------------------------------|------|------|
|                                   |                     |        |         |         |      | ATCC_15703                              |      | ium;s__Bifidobacterium_adolescentis                                                                                                   |                                                                                                                        |      |      |
| 521820dea22098c03e64451bdeca66be  | c45a1c57adff4460e_2 | 98.718 | 23626   | 23859   | V3V4 | Bifidobacterium_adolescentis_ATCC_15703 | True |                                                                                                                                       | d__Bacteria;p__Actinobacteriota;c__Actinobacteria;o__Bifidobacteriales;f__Bifidobacteriaceae;g__Bifidobacterium        | 12   | 0.01 |
| e31c7e269125382d9bd6ee8fcc1fde21  | d889f9dd971b473d_1  | 99.527 | 347873  | 347452  | V3V4 | Phocaeicola_vulgatus_ATCC_8482          | True | d__Bacteria;p__Bacteroidota;c__Bacteroidia;o__Bacteroidales;f__Bacteroidaceae;g__Bacteroides;s__Bacteroides_vulgatus                  | d__Bacteria;p__Bacteroidota;c__Bacteroidia;o__Bacteroidales;f__Bacteroidaceae;g__Bacteroides                           | 965  | 0.97 |
| 332b70897316f7f62b81dfc53f41ca52  | 266a835027f7464b_2  | 100    | 38225   | 37824   | V3V4 | Rhodobacter_sphaeroides_ATCC_17029      | True | d__Bacteria;p__Proteobacteria;c__Alphaproteobacteria;o__Rhodobacterales;f__Rhodobacteraceae;g__Rhodobacter;s__Rhodobacter_sphaeroides | d__Bacteria;p__Proteobacteria;c__Alphaproteobacteria;o__Rhodobacterales;f__Rhodobacteraceae;g__Rhodobacter             | 762  | 0.77 |
| ffc36e27c82042664a16bcd4d380b286  | 1eb3021faaec49c2_1  | 100    | 455325  | 455751  | V3V4 | Escherichia_coli_ATCC_700926            | True |                                                                                                                                       | d__Bacteria;p__Proteobacteria;c__Gammaproteobacteria;o__Enterobacterales;f__Enterobacteriaceae;g__Escherichia-Shigella | 6772 | 6.80 |
| f71e5aacd4c976a1833958c2870b1d8b  | 045df7c7cb0f42b5_1  | 100    | 1223181 | 1222755 | V3V4 | Neisseria_meningitidis_ATCC_BAA_335     | True | d__Bacteria;p__Proteobacteria;c__Gammaproteobacteria;o__Burkholderiales;f__Neisseriaceae;g__Neisseria;s__Neisseria_meningitidis       | d__Bacteria;p__Proteobacteria;c__Gammaproteobacteria;o__Burkholderiales;f__Neisseriaceae;g__Neisseria                  | 3480 | 3.50 |
| 88a3a8e95e3605bd051054f937cd e102 | 3042186b85304e8d_1  | 99.751 | 9691    | 10092   | V3V4 | Clostridium_beijerinckii_ATCC_35702     | True |                                                                                                                                       | d__Bacteria;p__Firmicutes;c__Clostridia;o__Clostridiales;f__Clostridiaceae;g__Clostridium_sensu_stricto_1              | 904  | 0.91 |
| e8de9432f2ada1078a2fda56ba92675a  | 4762fdd895094939_1  | 100    | 96706   | 97108   | V3V4 | Helicobacter_pylori_ATCC_700392         | True | d__Bacteria;p__Campilobacterota;c__Campylobacteria;o__Campylobacterales;f__Helicobacteraceae;g__Helicobacter;s__Helicobacter_pylori   | d__Bacteria;p__Campilobacterota;c__Campylobacteria;o__Campylobacterales;f__Helicobacteraceae;g__Helicobacter           | 3097 | 3.11 |
| 052ba7abaeaa968c4f79e3f97d1f0a2f  | 285a115d88c043f1_1  | 100    | 678693  | 679119  | V3V4 | Pseudomonas_aeruginosa_ATCC_9027        | True |                                                                                                                                       | d__Bacteria;p__Proteobacteria;c__Gammaproteobacteria;o__Pseudomonadales;f__Pseudomonadaceae;g__Pseudomonas             | 2581 | 2.59 |
| c42488aff4cc842bf285a401dba39cc4  | 89e35fec14744942_1  | 100    | 528661  | 529080  | V3V4 | Schaalia_odontolytica_ATCC_17982        | True | d__Bacteria;p__Actinobacteriota;c__Actinobacteria;o__Actinomycetales;f__Actinomycetaceae;g__Actinomyces;s__Schaalia_odontolytica      | d__Bacteria;p__Actinobacteriota;c__Actinobacteria;o__Actinomycetales;f__Actinomycetaceae;g__Actinomyces                | 2260 | 2.27 |
| b05f5459e068b529b2c41e659efdef34  | 9dc637a985b042c4_1  | 100    | 605572  | 605971  | V3V4 | Cutibacterium_acnes_ATCC_11828          | True |                                                                                                                                       | d__Bacteria;p__Actinobacteriota;c__Actinobacteria;o__Propionibacteriales;f__Propionibacteriaceae;g__Cutibacterium      | 411  | 0.41 |

|                                  |                    |        |        |        |      |                                                  |      |                                                                                                                          |                                                                                                            |          |      |
|----------------------------------|--------------------|--------|--------|--------|------|--------------------------------------------------|------|--------------------------------------------------------------------------------------------------------------------------|------------------------------------------------------------------------------------------------------------|----------|------|
| 892a20bbdc3ce599dc0c5d9f0866c352 | 27b35dd1651e48dd_1 | 100    | 213739 | 214165 | V3V4 | Enterococcus_faecalis_ATCC_47077                 | True |                                                                                                                          | d__Bacteria;p__Firmicutes;c__Bacilli;o__Lactobacillales;f__Enterococcaceae;g__Enterococcus                 | 2860     | 2.87 |
| 5c035b54ac1cea1c1da765208a66520  | 5964adb8d0df4fde_1 | 99.766 | 477829 | 478255 | V3V4 | Lactobacillus_gasseri_ATCC_33323                 | True | d__Bacteria;p__Firmicutes;c__Bacilli;o__Lactobacillales;f__Lactobacillaceae;g__Lactobacillus;s__Lactobacillus_gasseri    | d__Bacteria;p__Firmicutes;c__Bacilli;o__Lactobacillales;f__Lactobacillaceae;g__Lactobacillus               | 1747     | 1.75 |
| c3a3a503752209bc052b3995236b079f | 58ae911973b74ffc_1 | 100    | 16666  | 17092  | V3V4 | Streptococcus_agalactiae_ATC_C_BAA_611           | True | d__Bacteria;p__Firmicutes;c__Bacilli;o__Lactobacillales;f__Streptococcaceae;g__Streptococcus;s__Streptococcus_agalactiae | d__Bacteria;p__Firmicutes;c__Bacilli;o__Lactobacillales;f__Streptococcaceae;g__Streptococcus               | 6597     | 6.63 |
| 04be702b895fe5ed0568344daf564276 | 38ad2dab3e5e43b7_1 | 100    | 628061 | 628487 | V3V4 | Staphylococcus_aureus_subsp_aureus_ATCC_BAA_1556 | True |                                                                                                                          | d__Bacteria;p__Firmicutes;c__Bacilli;o__Staphylococcales;f__Staphylococcaceae;g__Staphylococcus            | 4304     | 4.32 |
| ef5af48ec2b6c023c5de28c59cb08a40 | adb6d513b7374f84_1 | 100    | 17048  | 17474  | V3V4 | Streptococcus_mutans_ATCC_700610                 | True | d__Bacteria;p__Firmicutes;c__Bacilli;o__Lactobacillales;f__Streptococcaceae;g__Streptococcus;s__Streptococcus_mutans     | d__Bacteria;p__Firmicutes;c__Bacilli;o__Lactobacillales;f__Streptococcaceae;g__Streptococcus               | 6030     | 6.06 |
| 99f8f7fb3dc2bb4e0990397d1c9e5dc4 | 38ad2dab3e5e43b7_1 | 99.766 | 628061 | 628487 | V3V4 | Staphylococcus_aureus_subsp_aureus_ATCC_BAA_1556 | True |                                                                                                                          | d__Bacteria;p__Firmicutes;c__Bacilli;o__Staphylococcales;f__Staphylococcaceae;g__Staphylococcus            | 804      | 0.81 |
| 194692a65aff7f21d0d0029503feed5  | adb6d513b7374f84_1 | 99.766 | 17048  | 17474  | V3V4 | Streptococcus_mutans_ATCC_700610                 | True | d__Bacteria;p__Firmicutes;c__Bacilli;o__Lactobacillales;f__Streptococcaceae;g__Streptococcus;s__Streptococcus_mutans     | d__Bacteria;p__Firmicutes;c__Bacilli;o__Lactobacillales;f__Streptococcaceae;g__Streptococcus               | 227      | 0.23 |
| 4e7848491cf85b1d56d3c920629ba5de | 285a115d88c043f1_1 | 97.418 | 678695 | 679119 | V3V4 | Pseudomonas_aeruginosa_ATC_C_9027                | True |                                                                                                                          | d__Bacteria;p__Proteobacteria;c__Gammaproteobacteria;o__Pseudomonadales;f__Pseudomonadaceae;g__Pseudomonas | 2.30E+01 | 0.02 |
| b8f980ec6ad0c86efb83bd1f64c3a252 | d889f9dd971b473d_1 | 99.763 | 347873 | 347452 | V3V4 | Phocaeicola_vulgatus_ATCC_8482                   | True | d__Bacteria;p__Bacteroidota;c__Bacteroidia;o__Bacteroidales;f__Bacteroidaceae;g__Bacteroides;s__Bacteroides_vulgatus     | d__Bacteria;p__Bacteroidota;c__Bacteroidia;o__Bacteroidales;f__Bacteroidaceae;g__Bacteroides               | 1030     | 1.03 |
| 3f298e5dbea50d14bc52110ff80df5c0 | 5964adb8d0df4fde_1 | 97.19  | 477829 | 478255 | V3V4 | Lactobacillus_gasseri                            | True |                                                                                                                          | d__Bacteria;p__Firmicutes;c__Bacilli;o__Lactobacillales;f__Lactobacillaceae;g__Lactobacillus               | 1        | 0.00 |

|                                  |                    |        |         |         |      | _ATCC_33<br>323                       |      |                                                                                                                                      |                                                                                                            |      |      |
|----------------------------------|--------------------|--------|---------|---------|------|---------------------------------------|------|--------------------------------------------------------------------------------------------------------------------------------------|------------------------------------------------------------------------------------------------------------|------|------|
| c49cc7c2c45bd7a87913453e515ea14f | 071a82bb90b94c6f_1 | 100    | 495134  | 495561  | V3V4 | Acinetobacter_baumannii_ATCC_17978    | True | d__Bacteria;p__Proteobacteria;c__Gammaproteobacteria;o__Pseudomonadales;f__Moraxellaceae;g__Acinetobacter;s__Acinetobacter_baumannii | d__Bacteria;p__Proteobacteria;c__Gammaproteobacteria;o__Pseudomonadales;f__Moraxellaceae;g__Acinetobacter  | 6724 | 6.75 |
| 170cb61a735e0bfe7a859f4613210635 | 27b35dd1651e48dd_1 | 98.084 | 213906  | 214165  | V3V4 | Enterococcus_faecalis_ATCC_47077      | True |                                                                                                                                      | d__Bacteria;p__Firmicutes;c__Bacilli;o__Lactobacillales;f__Enterococcaceae;g__Enterococcus                 | 1    | 0.00 |
| 8cb24777cb48dde0aac60dfeca125d10 | 5371a9904eb64361_1 | 100    | 9266    | 9693    | V3V4 | Bacillus_pacificus_ATCC_10987         | True |                                                                                                                                      | d__Bacteria;p__Firmicutes;c__Bacilli;o__Bacillales;f__Bacillaceae;g__Bacillus                              | 7565 | 7.60 |
| f85cf38f782a314e3ab5965a58f2e46e | 285a115d88c043f1_1 | 99.766 | 678693  | 679119  | V3V4 | Pseudomonas_aeruginosa_ATCC_9027      | True |                                                                                                                                      | d__Bacteria;p__Proteobacteria;c__Gammaproteobacteria;o__Pseudomonadales;f__Pseudomonadaceae;g__Pseudomonas | 1    | 0.00 |
| c4252de734fefdf07ede127685ee56   | f5bcb58692924cb7_1 | 98.834 | 1597643 | 1597217 | V3V4 | Staphylococcus_epidermidis_ATCC_12228 | True |                                                                                                                                      | d__Bacteria;p__Firmicutes;c__Bacilli;o__Staphylococcales;f__Staphylococcaceae;g__Staphylococcus            | 1    | 0.00 |
| 9b23053de8f4269fe6b5ce286dfbef3c | 5964adb8d0df4fde_1 | 100    | 477829  | 478255  | V3V4 | Lactobacillus_gasseri_ATCC_33323      | True | d__Bacteria;p__Firmicutes;c__Bacilli;o__Lactobacillales;f__Lactobacillaceae;g__Lactobacillus;s__Lactobacillus_gasseri                | d__Bacteria;p__Firmicutes;c__Bacilli;o__Lactobacillales;f__Lactobacillaceae;g__Lactobacillus               | 1153 | 1.16 |
| c1f46ee956e06530a83aa00914e4c7cb | adb6d513b7374f84_1 | 99.766 | 17048   | 17474   | V3V4 | Streptococcus_mutans_ATCC_700610      | True | d__Bacteria;p__Firmicutes;c__Bacilli;o__Lactobacillales;f__Streptococcaceae;g__Streptococcus;s__Streptococcus_mutans                 | d__Bacteria;p__Firmicutes;c__Bacilli;o__Lactobacillales;f__Streptococcaceae;g__Streptococcus               | 1    | 0.00 |
| 3f460e58e5d5db0dbaf1a71ceef1525d | 5964adb8d0df4fde_1 | 97.424 | 477829  | 478255  | V3V4 | Lactobacillus_gasseri_ATCC_33323      | True | d__Bacteria;p__Firmicutes;c__Bacilli;o__Lactobacillales;f__Lactobacillaceae;g__Lactobacillus;s__uncultured_bacterium                 | d__Bacteria;p__Firmicutes;c__Bacilli;o__Lactobacillales;f__Lactobacillaceae;g__Lactobacillus               | 5    | 0.01 |
| f8cad6522103a22e0788a989a039a794 | 266a835027f7464b_2 | 97.79  | 37792   | 37612   | V5V6 | Rhodobacter_sphaeroides_ATCC_17029    | True | d__Bacteria;p__Proteobacteria;c__Alphaproteobacteria;o__Rhodobacterales;f__Rhodobacteraceae;g__Paracoccus;s__uncultured_Paracoccus   | d__Bacteria;p__Proteobacteria;c__Alphaproteobacteria;o__Rhodobacterales;f__Rhodobacteraceae;g__Paracoccus  | 24   | 0.03 |
| c640b138c428758d0ee70015ffffebd  | 58ae911973b74ffc_1 | 97.382 | 17124   | 17314   | V5V6 | Streptococcus_agalactiae_ATCC_BAA_611 | True | d__Bacteria;p__Firmicutes;c__Bacilli;o__Lactobacillales;f__Streptococcaceae;g__Streptococcus;s__Streptococcus_gordonii               | d__Bacteria;p__Firmicutes;c__Bacilli;o__Lactobacillales;f__Streptococcaceae;g__Streptococcus               | 137  | 0.20 |

|                                  |                    |        |         |         |      |                                       |      |                                                                                                                                      |                                                                                                            |      |       |
|----------------------------------|--------------------|--------|---------|---------|------|---------------------------------------|------|--------------------------------------------------------------------------------------------------------------------------------------|------------------------------------------------------------------------------------------------------------|------|-------|
| 75e81af1ea94c080a5e24422bf0f8270 | 5371a9904eb64361_1 | 97.283 | 9725    | 9908    | V5V6 | Bacillus_pacificus_ATCC_10987         | True |                                                                                                                                      | d__Bacteria;p__Firmicutes;c__Bacilli;o__Bacillales;f__Bacillaceae;g__Bacillus                              | 199  | 0.28  |
| 41ad2a26bdea29ce20ce5c2f716b71e5 | 5964adb8d0df4fde_1 | 97.283 | 478287  | 478470  | V5V6 | Lactobacillus_gasseri_ATCC_33323      | True | d__Bacteria;p__Firmicutes;c__Bacilli;o__Lactobacillales;f__Enterococcaceae;g__Enterococcus;s__Enterococcus_mundtii                   | d__Bacteria;p__Firmicutes;c__Bacilli;o__Lactobacillales;f__Enterococcaceae;g__Enterococcus                 | 137  | 0.20  |
| b9a27f523947e6b31eaff94f591a55de | 5371a9904eb64361_1 | 100    | 9725    | 9924    | V5V6 | Bacillus_pacificus_ATCC_10987         | True |                                                                                                                                      | d__Bacteria;p__Firmicutes;c__Bacilli;o__Bacillales;f__Bacillaceae;g__Bacillus                              | 312  | 0.44  |
| 1d9d72ff20c4f8425b3aa55e1d742dc0 | 285a115d88c043f1_1 | 97.802 | 679151  | 679332  | V5V6 | Pseudomonas_aeruginosa_ATCC_9027      | True | d__Bacteria;p__Proteobacteria;c__Gammaproteobacteria;o__Pseudomonadales;f__Pseudomonadaceae;g__Pseudomonas;s__Pseudomonas_aeruginosa | d__Bacteria;p__Proteobacteria;c__Gammaproteobacteria;o__Pseudomonadales;f__Pseudomonadaceae;g__Pseudomonas | 72   | 0.10  |
| 4ba5a36a442f7295337341bae584d319 | 3042186b85304e8d_1 | 99.5   | 10124   | 10323   | V5V6 | Clostridium_beijerinckii_ATCC_35702   | True | d__Bacteria;p__Firmicutes;c__Clostridia;o__Clostridiales;f__Clostridiaceae;g__Clostridium_sensu_stricto_1;s__uncultured_Clostridium  | d__Bacteria;p__Firmicutes;c__Clostridia;o__Clostridiales;f__Clostridiaceae;g__Clostridium_sensu_stricto_1  | 1536 | 2.19  |
| 42ae093ca8e3d07f4f5318f40d0a20da | 3042186b85304e8d_1 | 100    | 10124   | 10340   | V5V6 | Clostridium_beijerinckii_ATCC_35702   | True | d__Bacteria;p__Firmicutes;c__Clostridia;o__Clostridiales;f__Clostridiaceae;g__Clostridium_sensu_stricto_1;s__uncultured_Clostridium  | d__Bacteria;p__Firmicutes;c__Clostridia;o__Clostridiales;f__Clostridiaceae;g__Clostridium_sensu_stricto_1  | 99   | 0.14  |
| b7f8ec8c56ea6c5a877b899bfa65f6cf | 27b35dd1651e48dd_1 | 97.283 | 214197  | 214380  | V5V6 | Enterococcus_faecalis_ATCC_47077      | True |                                                                                                                                      | d__Bacteria;p__Firmicutes;c__Bacilli;o__Lactobacillales;f__Enterococcaceae;g__Enterococcus                 | 90   | 0.13  |
| d00984415738187f2bd75ba771f699d4 | 3042186b85304e8d_1 | 99.5   | 10124   | 10323   | V5V6 | Clostridium_beijerinckii_ATCC_35702   | True | d__Bacteria;p__Firmicutes;c__Clostridia;o__Clostridiales;f__Clostridiaceae;g__Clostridium_sensu_stricto_1;s__uncultured_Clostridium  | d__Bacteria;p__Firmicutes;c__Clostridia;o__Clostridiales;f__Clostridiaceae;g__Clostridium_sensu_stricto_1  | 3582 | 5.11  |
| e0604154e9581bc0b7e1f13c57121882 | f5bcb58692924cb7_1 | 99.502 | 1597185 | 1596986 | V5V6 | Staphylococcus_epidermidis_ATCC_12228 | True | d__Bacteria;p__Firmicutes;c__Bacilli;o__Staphylococcales;f__Staphylococcaceae;g__Staphylococcus;s__Staphylococcus_epidermidis        | d__Bacteria;p__Firmicutes;c__Bacilli;o__Staphylococcales;f__Staphylococcaceae;g__Staphylococcus            | 15   | 0.02  |
| 79dbaba672642ebd014b1e7b9b328112 | 071a82bb90b94c6f_1 | 100    | 19023   | 19242   | V5V6 | Acinetobacter_baumannii_ATCC_17978    | True |                                                                                                                                      | d__Bacteria;p__Proteobacteria;c__Gammaproteobacteria;o__Pseudomonadales;f__Moraxellaceae;g__Acinetobacter  | 8033 | 11.45 |

|                                  |                    |        |         |         |      |                                       |      |                                                                                                                                            |                                                                                                                        |       |       |
|----------------------------------|--------------------|--------|---------|---------|------|---------------------------------------|------|--------------------------------------------------------------------------------------------------------------------------------------------|------------------------------------------------------------------------------------------------------------------------|-------|-------|
| 6a2f7caa6b9c38ac8d74597de800bc87 | 2504aeb524e74d25_1 | 100    | 230126  | 230325  | V5V6 | Porphyromonas_gingivalis_ATCC_33277   | True |                                                                                                                                            |                                                                                                                        | 8152  | 11.62 |
| 012b9a89e0c38429987cfa5126ca9e98 | 58ae911973b74ffc_1 | 100    | 17124   | 17323   | V5V6 | Streptococcus_agalactiae_ATCC_BAA_611 | True | d__Bacteria;p__Firmicutes;c__Bacilli;o__Lactobacillales;f__Streptococcaceae;g__Streptococcus;s__Streptococcus_gordonii                     | d__Bacteria;p__Firmicutes;c__Bacilli;o__Lactobacillales;f__Streptococcaceae;g__Streptococcus                           | 202   | 0.29  |
| e0a2bef6846fbd1aa22828c8a8086c86 | 89e35fec14744942_1 | 100    | 529112  | 529324  | V5V6 | Schaalia_odontolytica_ATCC_17982      | True |                                                                                                                                            | d__Bacteria;p__Actinobacteriota;c__Actinobacteria;o__Actinomycetales;f__Actinomycetaceae;g__Actinomyces                | 141   | 0.20  |
| 21d6f50624ff01e5bee69a84112530a0 | f5bcb58692924cb7_1 | 100    | 1597185 | 1596986 | V5V6 | Staphylococcus_epidermidis_ATCC_12228 | True | d__Bacteria;p__Firmicutes;c__Bacilli;o__Staphylococcales;f__Staphylococcaceae;g__Staphylococcus;s__Staphylococcus_sp.                      | d__Bacteria;p__Firmicutes;c__Bacilli;o__Staphylococcales;f__Staphylococcaceae;g__Staphylococcus                        | 9126  | 13.01 |
| 3704c6a53ad64ba61b11b9bb6e7e06f7 | 3042186b85304e8d_1 | 100    | 10124   | 10323   | V5V6 | Clostridium_beijerinckii_ATCC_35702   | True | d__Bacteria;p__Firmicutes;c__Clostridia;o__Clostridiales;f__Clostridiaceae;g__Clostridium_sensu_stricto_1;s__uncultured_Clostridium        | d__Bacteria;p__Firmicutes;c__Clostridia;o__Clostridiales;f__Clostridiaceae;g__Clostridium_sensu_stricto_1              | 21062 | 30.03 |
| 56c7c15ecc0af90185a9c2e39af9a4a4 | 1eb3021faaec49c2_1 | 100    | 455783  | 455994  | V5V6 | Escherichia_coli_ATCC_700926          | True | d__Bacteria;p__Proteobacteria;c__Gammaproteobacteria;o__Enterobacterales;f__Enterobacteriaceae;g__Escherichia-Shigella;s__Escherichia_coli | d__Bacteria;p__Proteobacteria;c__Gammaproteobacteria;o__Enterobacterales;f__Enterobacteriaceae;g__Escherichia-Shigella | 387   | 0.55  |
| 9a38446a8cba2f1f974a622d8092fb1  | 3042186b85304e8d_1 | 98.913 | 10124   | 10306   | V5V6 | Clostridium_beijerinckii_ATCC_35702   | True | d__Bacteria;p__Firmicutes;c__Clostridia;o__Clostridiales;f__Clostridiaceae;g__Clostridium_sensu_stricto_1;s__uncultured_Clostridium        | d__Bacteria;p__Firmicutes;c__Clostridia;o__Clostridiales;f__Clostridiaceae;g__Clostridium_sensu_stricto_1              | 10    | 0.01  |
| 91c2afa196dfa8a99f1dda3f89470f7d | 2504aeb524e74d25_1 | 100    | 230126  | 230349  | V5V6 | Porphyromonas_gingivalis_ATCC_33277   | True |                                                                                                                                            |                                                                                                                        | 61    | 0.09  |
| 28b80793effa80e95f17ba78f86ba3a1 | 5964adb8d0df4fde_1 | 100    | 478287  | 478487  | V5V6 | Lactobacillus_gasseri_ATCC_33323      | True |                                                                                                                                            |                                                                                                                        | 105   | 0.15  |
| 8eead67fce32a188c8e0264c8c648a2d | 4762fdd895094939_1 | 100    | 97140   | 97366   | V5V6 | Helicobacter_pylori_ATCC_700392       | True | d__Bacteria;p__Campilobacterota;c__Campylobacteria;o__Campylobacterales;f__Helicobacteraceae;g__uncultured                                 | d__Bacteria;p__Campilobacterota;c__Campylobacteria;o__Campylobacterales;f__Helicobacteraceae;g__uncultured             | 116   | 0.17  |

|                                  |                     |        |        |        |      |                                         |      |                                                                                                                                        |                                                                                                                 |      |       |
|----------------------------------|---------------------|--------|--------|--------|------|-----------------------------------------|------|----------------------------------------------------------------------------------------------------------------------------------------|-----------------------------------------------------------------------------------------------------------------|------|-------|
|                                  |                     |        |        |        |      |                                         |      | ured;s__uncultured_Epsilonproteobacteria                                                                                               |                                                                                                                 |      |       |
| fce4db9d80643391cfd2508ac33fa8d  | 2b7fa0e1de5f42de_1  | 97.207 | 183304 | 183482 | V5V6 | Deinococcus_radiourans_ATCC_BAA_816     | True | d__Bacteria;p__Firmicutes;c__Clostridia;o__Clostridiales;f__Clostridiaceae;g__Clostridium_sensu_stricto_13;s__rumen_bacterium          | d__Bacteria;p__Firmicutes;c__Clostridia;o__Clostridiales;f__Clostridiaceae;g__Clostridium_sensu_stricto_13      | 33   | 0.05  |
| 0fa7e151a8f8896c85778ba8addc5103 | 4762fdd895094939_1  | 98.37  | 97140  | 97322  | V5V6 | Helicobacter_pylori_ATCC_700392         | True |                                                                                                                                        |                                                                                                                 | 15   | 0.02  |
| f2497fa105c39ed688f04e4a8bb515a  | adb6d513b7374f84_1  | 100    | 17506  | 17718  | V5V6 | Streptococcus_mutans_ATCC_700610        | True | d__Bacteria;p__Firmicutes;c__Bacilli;o__Lactobacillales;f__Streptococcaceae;g__Streptococcus;s__Streptococcus_gordonii                 | d__Bacteria;p__Firmicutes;c__Bacilli;o__Lactobacillales;f__Streptococcaceae;g__Streptococcus                    | 423  | 0.60  |
| e6b816d934aea16c3b7dd7e8b25a37d0 | 5371a9904eb64361_1  | 98.953 | 9725   | 9915   | V5V6 | Bacillus_pacificus_ATCC_10987           | True |                                                                                                                                        | d__Bacteria;p__Firmicutes;c__Bacilli;o__Bacillales;f__Bacillaceae;g__Bacillus                                   | 157  | 0.22  |
| 5ea873145571ae5cc0af20f573bae47f | 5964adb8d0df4fde_1  | 98.37  | 478287 | 478470 | V5V6 | Lactobacillus_gasseri_ATCC_33323        | True | d__Bacteria;p__Firmicutes;c__Bacilli;o__Lactobacillales;f__Enterococcaceae;g__Enterococcus;s__Enterococcus_mundtii                     | d__Bacteria;p__Firmicutes;c__Bacilli;o__Lactobacillales;f__Enterococcaceae;g__Enterococcus                      | 104  | 0.15  |
| ddf00153358dd52bbc1a5646ff83ff19 | c45a1c57adff4460e_2 | 100    | 23891  | 24087  | V5V6 | Bifidobacterium_adolescentis_ATCC_15703 | True | d__Bacteria;p__Actinobacteriota;c__Actinobacteria;o__Bifidobacteriales;f__Bifidobacteriaceae;g__Bifidobacterium;s__Bifidobacterium_sp. | d__Bacteria;p__Actinobacteriota;c__Actinobacteria;o__Bifidobacteriales;f__Bifidobacteriaceae;g__Bifidobacterium | 1212 | 1.73  |
| ab2cd68e1a2959f94c31e0a25fcf6b10 | 285a115d88c043f1_1  | 100    | 679151 | 679370 | V5V6 | Pseudomonas_aeruginosa_ATCC_9027        | True | d__Bacteria;p__Proteobacteria;c__Gammaproteobacteria;o__Pseudomonadales;f__Pseudomonadaceae;g__Pseudomonas;s__Pseudomonas_aeruginosa   | d__Bacteria;p__Proteobacteria;c__Gammaproteobacteria;o__Pseudomonadales;f__Pseudomonadaceae;g__Pseudomonas      | 136  | 0.19  |
| f32884e8124f8ed14a6a973f9e59b65f | d889f9dd971b473d_1  | 100    | 347420 | 347221 | V5V6 | Phocaeicola_vulgatus_ATCC_8482          | True | d__Bacteria;p__Bacteroidota;c__Bacteroidia;o__Bacteroidales;f__Paludibacteraceae;g__Paludibacter;s__uncultured_bacterium               | d__Bacteria;p__Bacteroidota;c__Bacteroidia;o__Bacteroidales;f__Paludibacteraceae;g__Paludibacter                | 7810 | 11.14 |
| e9de1e3fc5a26f227056f0678cdec4df | d889f9dd971b473d_1  | 99.5   | 347420 | 347221 | V5V6 | Phocaeicola_vulgatus_ATCC_8482          | True | d__Bacteria;p__Bacteroidota;c__Bacteroidia;o__Bacteroidales;f__Paludibacteraceae;g__Paludibacter;s__uncultured_bacterium               | d__Bacteria;p__Bacteroidota;c__Bacteroidia;o__Bacteroidales;f__Paludibacteraceae;g__Paludibacter                | 5106 | 7.28  |
| f9050ac7af24954bcf69dd15c8a47e64 | 27b35dd1651e48dd_1  | 98.37  | 214197 | 214380 | V5V6 | Enterococcus_faecalis                   | True |                                                                                                                                        | d__Bacteria;p__Firmicutes;c__Bacilli;o__Lactobacillales;f__Enterococcaceae;g__Enterococcus                      | 73   | 0.10  |



|                                  |                    |        |        |        |      | _ATCC_47077                  |      |                                                                                                                                            |                                                                                                                        |    |      |
|----------------------------------|--------------------|--------|--------|--------|------|------------------------------|------|--------------------------------------------------------------------------------------------------------------------------------------------|------------------------------------------------------------------------------------------------------------------------|----|------|
| 0dfd270b9832257283af9b9f78acc52b | 1eb3021faaec49c2_1 | 98.585 | 455783 | 455994 | V5V6 | Escherichia_coli_ATCC_700926 | True | d__Bacteria;p__Proteobacteria;c__Gammaproteobacteria;o__Enterobacterales;f__Enterobacteriaceae;g__Escherichia-Shigella;s__Escherichia_coli | d__Bacteria;p__Proteobacteria;c__Gammaproteobacteria;o__Enterobacterales;f__Enterobacteriaceae;g__Escherichia-Shigella | 45 | 0.06 |
| 2de4f95c844ab13c180b39c7568462a0 |                    |        |        |        | V5V6 |                              |      | d__Bacteria;p__Firmicutes;c__Clostridia;o__Clostridiales;f__Clostridiaceae;g__Clostridium_sensu_stricto_13;s__rumen_bacterium              | d__Bacteria;p__Firmicutes;c__Clostridia;o__Clostridiales;f__Clostridiaceae;g__Clostridium_sensu_stricto_13             | 83 | 0.12 |
| 928d3dc22f242a87f28f9219c099c075 |                    |        |        |        | V5V6 |                              |      | d__Bacteria;p__Proteobacteria;c__Alphaproteobacteria;o__Rhodobacterales;f__Rhodobacteraceae;g__Paracoccus;s__uncultured_Paracoccus         | d__Bacteria;p__Proteobacteria;c__Alphaproteobacteria;o__Rhodobacterales;f__Rhodobacteraceae;g__Paracoccus              | 19 | 0.03 |
| 8046b007682c31562cd6f016415cb45f |                    |        |        |        | V5V6 |                              |      |                                                                                                                                            |                                                                                                                        | 12 | 0.02 |
| c42e0b7c52736f3bd883bf490b386e9e |                    |        |        |        | V5V6 |                              |      |                                                                                                                                            | d__Bacteria;p__Proteobacteria;c__Gammaproteobacteria;o__Enterobacterales;f__Enterobacteriaceae;g__Escherichia-Shigella | 13 | 0.02 |
| 634f27f65e3b8ec24f659647f103077  |                    |        |        |        | V5V6 |                              |      | d__Bacteria;p__Proteobacteria;c__Gammaproteobacteria;o__Pseudomonadales;f__Moraxellaceae;g__Acinetobacter;s__Acinetobacter_sp.             | d__Bacteria;p__Proteobacteria;c__Gammaproteobacteria;o__Pseudomonadales;f__Moraxellaceae;g__Acinetobacter              | 6  | 0.01 |
| 81feba462792be505fe7ad9288c6616c |                    |        |        |        | V5V6 |                              |      |                                                                                                                                            |                                                                                                                        | 15 | 0.02 |
| c79e84621eddb90c282e75399d80fe76 |                    |        |        |        | V5V6 |                              |      | d__Bacteria;p__Firmicutes;c__Bacilli;o__Lactobacillales;f__Streptococcaceae;g__Streptococcus;s__Streptococcus_gordonii                     | d__Bacteria;p__Firmicutes;c__Bacilli;o__Lactobacillales;f__Streptococcaceae;g__Streptococcus                           | 7  | 0.01 |
| fbfec8c1653111db7b8f9a5acf06e0e4 |                    |        |        |        | V5V6 |                              |      |                                                                                                                                            | d__Bacteria;p__Proteobacteria;c__Gammaproteobacteria;o__Burkholderiales;f__Oxalobacteraceae;g__Herbaspirillum          | 2  | 0.00 |
| 3f52d098be6c09dc2688c232e0522e6e |                    |        |        |        | V5V6 |                              |      |                                                                                                                                            |                                                                                                                        | 74 | 0.11 |
| e3007d82e148295473b573cb0cfd1802 |                    |        |        |        | V5V6 |                              |      |                                                                                                                                            |                                                                                                                        | 22 | 0.03 |

|                                  |                            |     |            |            |      |                                                                                                                        |      |                                                                                                                                     |     |      |
|----------------------------------|----------------------------|-----|------------|------------|------|------------------------------------------------------------------------------------------------------------------------|------|-------------------------------------------------------------------------------------------------------------------------------------|-----|------|
| ea6cfd2f886a465e1f22845677ca43e  |                            |     |            |            | V5V6 |                                                                                                                        |      |                                                                                                                                     | 6   | 0.01 |
| 678715dd463dd71ad724f2490dfd7364 |                            |     |            |            | V5V6 |                                                                                                                        |      |                                                                                                                                     | 16  | 0.02 |
| a7468bfe80697ea6b0e8655125ffbec9 |                            |     |            |            | V5V6 | d__Bacteria;p__Firmicutes;c__Bacilli;o__Lactobacillales;f__Enterococcaceae;g__Enterococcus;s__Enterococcus_mundtii     |      | d__Bacteria;p__Firmicutes;c__Bacilli;o__Lactobacillales;f__Enterococcaceae;g__Enterococcus                                          | 90  | 0.13 |
| 4bf0aeed2b0e74b2bc4e2447e45fa6cf |                            |     |            |            | V5V6 |                                                                                                                        |      | d__Bacteria;p__Firmicutes;c__Bacilli;o__Staphylococcales;f__Staphylococaceae;g__Staphylococcus                                      | 12  | 0.02 |
| 105b900b8b271fc1279a9f00f63fd8da |                            |     |            |            | V5V6 | d__Bacteria;p__Firmicutes;c__Bacilli;o__Lactobacillales;f__Streptococcaceae;g__Streptococcus;s__Streptococcus_gordonii |      | d__Bacteria;p__Firmicutes;c__Bacilli;o__Lactobacillales;f__Streptococcaceae;g__Streptococcus                                        | 128 | 0.18 |
| 6beaac5c0c09537786551f0740e1f8e6 | 38ad2da<br>b3e5e43<br>b7_1 | 100 | 62851<br>9 | 62871<br>8 | V5V6 | Staphylococcus_aureus_subsp_aureus_A<br>TCC_BAA_1556                                                                   | True | d__Bacteria;p__Firmicutes;c__Bacilli;o__Staphylococcales;f__Staphylococaceae;g__Staphylococcus                                      | 373 | 0.53 |
| 2d171c4fcb88172f9022e70d09b64578 |                            |     |            |            | V5V6 |                                                                                                                        |      | d__Bacteria;p__Firmicutes;c__Clostridia;o__Clostridiales;f__Clostridiaceae;g__Clostridium_sensu_stricto_1;s__uncultured_Clostridium | 25  | 0.04 |
| 9356c352f9e2de6d1675a9a73c9608b6 |                            |     |            |            | V5V6 |                                                                                                                        |      | d__Bacteria;p__Firmicutes;c__Clostridia;o__Clostridiales;f__Clostridiaceae;g__Clostridium_sensu_stricto_1;s__uncultured_Clostridium | 60  | 0.09 |
| 3b08e2713ab41b7a404cfaa9ad2e833a |                            |     |            |            | V5V6 |                                                                                                                        |      | d__Bacteria;p__Firmicutes;c__Bacilli;o__Lactobacillales;f__Streptococcaceae;g__Streptococcus;s__Streptococcus_gordonii              | 1   | 0.00 |
| 792bf390207b1d9bc70595633c70b17f |                            |     |            |            | V5V6 |                                                                                                                        |      | d__Bacteria;p__Proteobacteria;c__Alphaproteobacteria;o__Rhodobacterales;f__Rhodobacteraceae;g__Paracoccus;s__uncultured_Paracoccus  | 18  | 0.03 |
| e25ebbf67c652da38afef831ff1bda3f |                            |     |            |            | V5V6 |                                                                                                                        |      | d__Bacteria;p__Proteobacteria;c__Alphaproteobacteria;o__Rhodobacterales;f__Rhodobacteraceae;g__Paracoccus;s__uncultured_Paracoccus  | 35  | 0.05 |

|                                   |                    |        |         |         |      |                                         |      |                                                                                                                                    |                                                                                                                              |     |      |
|-----------------------------------|--------------------|--------|---------|---------|------|-----------------------------------------|------|------------------------------------------------------------------------------------------------------------------------------------|------------------------------------------------------------------------------------------------------------------------------|-----|------|
| 56f1751149e7f17b825efca9b0ec1569  |                    |        |         |         | V5V6 |                                         |      | d__Bacteria;p__Proteobacteria;c__Alphaproteobacteria;o__Rhizobiales;f__Rhizobiaceae;g__Mesorhizobium;s__Mesorhizobium_sp.          | d__Bacteria;p__Proteobacteria;c__Alphaproteobacteria;o__Rhizobiales;f__Rhizobiaceae;g__Mesorhizobium                         | 6   | 0.01 |
| 5903cb99ef12f590c6c3de7e367df82d  |                    |        |         |         | V5V6 |                                         |      |                                                                                                                                    |                                                                                                                              | 1   | 0.00 |
| c6c3ab4e828fb40d6e05967b7aac9338  |                    |        |         |         | V5V6 |                                         |      |                                                                                                                                    |                                                                                                                              | 93  | 0.13 |
| c81def64b8f2523ef3c7fefc8711edf6  |                    |        |         |         | V5V6 |                                         |      | d__Bacteria;p__Firmicutes;c__Bacilli;o__Lactobacillales;f__Streptococcaceae;g__Streptococcus;s__Streptococcus_gordonii             | d__Bacteria;p__Firmicutes;c__Bacilli;o__Lactobacillales;f__Streptococcaceae;g__Streptococcus                                 | 11  | 0.02 |
| ef3199891723da4b0a64b80682bad a68 |                    |        |         |         | V5V6 |                                         |      |                                                                                                                                    |                                                                                                                              | 2   | 0.00 |
| d77aa435264c499b17b7e0eeb121a585  | 27b35dd1651e48dd_1 | 100    | 214197  | 214396  | V5V6 | Enterococcus_faecalis_ATCC_47077        | True | d__Bacteria;p__Firmicutes;c__Bacilli;o__Lactobacillales;f__Enterococcaceae;g__Enterococcus;s__Enterococcus_faecalis                | d__Bacteria;p__Firmicutes;c__Bacilli;o__Lactobacillales;f__Enterococcaceae;g__Enterococcus                                   | 123 | 0.18 |
| 20392706f8152cfe29c2fe551e5c408d  | 2b7fa0e1de5f42de_1 | 98.324 | 183304  | 183482  | V5V6 | Deinococcus_radiourans_ATCC_BAA_816     | True |                                                                                                                                    |                                                                                                                              | 20  | 0.03 |
| 5a6c87d6a4eb5e114959f6192f29b641  | c45a1c57adf4460e_2 | 100    | 23609   | 23861   | V5V6 | Bifidobacterium_adolescentis_ATCC_15703 | True |                                                                                                                                    |                                                                                                                              | 30  | 0.04 |
| d087f1ce2b06f0b0deb360e308d878c1  | 045df7c7cb0f42b5_1 | 100    | 1222723 | 1222504 | V5V6 | Neisseria_meningitidis_ATCC_BAA_335     | True | d__Bacteria;p__Proteobacteria;c__Gammaproteobacteria;o__Burkholderiales;f__Chromobacteriaceae;g__Vogesella;s__uncultured_bacterium | d__Bacteria;p__Proteobacteria;c__Gammaproteobacteria;o__Burkholderiales;f__Chromobacteriaceae;g__Vogesella                   | 114 | 0.16 |
| 421770193803d8f3fe9cf981628b1cde  | 1eb3021faaec49c2_1 | 100    | 455528  | 455753  | V4   | Escherichia_coli_ATCC_700926            | True |                                                                                                                                    | d__Bacteria;p__Proteobacteria;c__Gammaproteobacteria;o__Enterobacterales;f__Enterobacteriaceae;g__Escherichia-Shigella       | 3   | 0.00 |
| ab6b7b90747341ce39f82d0a22a1d37d  |                    |        |         |         | V4   |                                         |      |                                                                                                                                    | d__Bacteria;p__Proteobacteria;c__Alphaproteobacteria;o__Rhizobiales;f__Beijerinckiaceae;g__Methylobacterium-Methylobacterium | 4   | 0.00 |

|                                          |    |                                                                                                                                                       |                                                                                                                           |     |      |
|------------------------------------------|----|-------------------------------------------------------------------------------------------------------------------------------------------------------|---------------------------------------------------------------------------------------------------------------------------|-----|------|
| a0a0b67a4c65c67<br>78fe8e1e04e7e3d<br>49 | V4 | d__Bacteria;p__Firmicutes;c__Clostridia;o__Peptostreptococcales-Tissierellales;f__Peptostreptococcaceae;g__Clostridioides;s__Clostridioides_difficile | d__Bacteria;p__Firmicutes;c__Clostridia;o__Peptostreptococcales-Tissierellales;f__Peptostreptococcaceae;g__Clostridioides | 9   | 0.00 |
| efe485bddd633d<br>28fa7694f38d036<br>08f | V4 |                                                                                                                                                       |                                                                                                                           | 2   | 0.00 |
| 8375d98f3453435<br>40e7a4d73b2eb1<br>f82 | V4 |                                                                                                                                                       | d__Bacteria;p__Firmicutes;c__Clostridia;o__Clostridiales;f__Clostridiaceae;g__Clostridium_sensu_stricto_1                 | 6   | 0.00 |
| 3481fa43fe5fba6<br>aecdc7f9aae6ed9<br>c0 | V4 |                                                                                                                                                       |                                                                                                                           | 160 | 0.07 |
| 4cbfff144d4e7a4<br>e0f4619ed505be0<br>70 | V4 |                                                                                                                                                       |                                                                                                                           | 55  | 0.02 |
| f5f5e0da8973046<br>2abaf6301a95571<br>93 | V4 |                                                                                                                                                       | d__Bacteria;p__Firmicutes;c__Clostridia;o__Oscillospirales;f__Ruminococcaceae;g__Faecalibacterium                         | 20  | 0.01 |
| fb428d07d03e32<br>be0b85eacbed10<br>df0a | V4 | d__Bacteria;p__Firmicutes;c__Clostridia;o__Lachnospirales;f__Lachnospiraceae;g__Coprococcus;s__Coprococcus_eutactus                                   | d__Bacteria;p__Firmicutes;c__Clostridia;o__Lachnospirales;f__Lachnospiraceae;g__Coprococcus                               | 19  | 0.01 |
| ec6732c2e0d4cf6<br>4b3d0350e7fe3d<br>efb | V4 |                                                                                                                                                       | d__Bacteria;p__Firmicutes;c__Clostridia;o__Lachnospirales;f__Lachnospiraceae;g__Roseburia                                 | 41  | 0.02 |
| 247dd7bf282099<br>0e45df15e2ca76d<br>bd1 | V4 |                                                                                                                                                       |                                                                                                                           | 1   | 0.00 |
| c939ee112ba9826<br>65e012437dae05<br>c1e | V4 |                                                                                                                                                       |                                                                                                                           | 186 | 0.08 |
| 2c982937754e632<br>1f861027032db8<br>0f7 | V4 |                                                                                                                                                       | d__Bacteria;p__Bacteroidota;c__Bacteroidia;o__Bacteroidales;f__Bacteroidaceae;g__Bacteroides                              | 13  | 0.01 |
| 35cbb315e019e0<br>a8768d4b73862d<br>f415 | V4 |                                                                                                                                                       | d__Bacteria;p__Actinobacteriota;c__Coriobacteriia;o__Coriobacteriales;f__Coriobacteriaceae;g__Collinsella                 | 11  | 0.00 |
| 9c754ee09188996<br>02c8196cfc5a756<br>92 | V4 |                                                                                                                                                       |                                                                                                                           | 6   | 0.00 |

|                                          |                            |     |             |             |    |                                         |      |                                                                                                                                                    |                                                                                                                        |       |       |
|------------------------------------------|----------------------------|-----|-------------|-------------|----|-----------------------------------------|------|----------------------------------------------------------------------------------------------------------------------------------------------------|------------------------------------------------------------------------------------------------------------------------|-------|-------|
| 685a1812a6e46f7<br>2d7cf1f4a060b8e<br>96 |                            |     |             |             | V4 |                                         |      |                                                                                                                                                    | d__Bacteria;p__Actinobacteriota;c__Actinobacteria;o__Corynebacteriales;f__Corynebacteriaceae;g__Corynebacterium        | 3     | 0.00  |
| 99bccd58aaeb00f<br>98e22add40be6e<br>36b |                            |     |             |             | V4 |                                         |      | d__Bacteria;p__Firmicutes;c__Clostridia;o__Peptostreptococcales-Tissierellales;f__Peptostreptococcae;g__Clostridioides;s__Clostridioides_difficile | d__Bacteria;p__Firmicutes;c__Clostridia;o__Peptostreptococcales-Tissierellales;f__Peptostreptococcae;g__Clostridioides | 408   | 0.17  |
| fa531a9e5007f7d<br>080e555401270d<br>85a |                            |     |             |             | V4 |                                         |      |                                                                                                                                                    | d__Bacteria;p__Fusobacteriota;c__Fusobacteriia;o__Fusobacteriales;f__Fusobacteriaceae;g__Fusobacterium                 | 105   | 0.04  |
| cd3526e9ddf608<br>ed31c4f3d648ca8<br>034 |                            |     |             |             | V4 |                                         |      |                                                                                                                                                    | d__Bacteria;p__Proteobacteria;c__Gammaproteobacteria;o__Burkholderiales;f__Sutterellaceae;g__Parasutterella            | 6     | 0.00  |
| a19be9fe0ba2ea2<br>84bd53cb94f622<br>471 |                            |     |             |             | V4 |                                         |      |                                                                                                                                                    | d__Bacteria;p__Firmicutes;c__Clostridia;o__Clostridiales;f__Clostridiaceae;g__Clostridium_sensu_stricto_1              | 2     | 0.00  |
| 5a6c87d6a4eb5e<br>114959f6192f29b<br>641 | c45a1c5<br>7adf446<br>0e_2 | 100 | 23609       | 23861       | V4 | Bifidobacterium_adolescentis_ATCC_15703 | True |                                                                                                                                                    | d__Bacteria;p__Actinobacteriota;c__Actinobacteria;o__Bifidobacteriales;f__Bifidobacteriaceae;g__Bifidobacterium        | 9848  | 4.17  |
| 8df399e29acb5a5<br>83f449a82db4e17<br>c9 |                            |     |             |             | V4 |                                         |      |                                                                                                                                                    | d__Bacteria;p__Firmicutes;c__Bacilli;o__Lactobacillales;f__Lactobacillaceae;g__Lactobacillus                           | 46    | 0.02  |
| da5bc53279a680<br>c25d503cb1bdc0<br>e57a | 9dc637a<br>985b042<br>c4_1 | 100 | 60573<br>0  | 60597<br>7  | V4 | Cutibacterium_acnes_ATCC_11828          | True |                                                                                                                                                    | d__Bacteria;p__Actinobacteriota;c__Actinobacteria;o__Propionibacteriales;f__Propionibacteriaceae;g__Cutibacterium      | 3097  | 1.31  |
| 463d246ab2d6bc<br>2481d5aab8de07<br>5a8b | 9dc637a<br>985b042<br>c4_1 | 100 | 60575<br>4  | 60597<br>7  | V4 | Cutibacterium_acnes_ATCC_11828          | True |                                                                                                                                                    | d__Bacteria;p__Actinobacteriota;c__Actinobacteria;o__Propionibacteriales;f__Propionibacteriaceae;g__Cutibacterium      | 3     | 0.00  |
| e7cfd084265c4df<br>4856ca07b1c9b2<br>4ee | adb6d5<br>13b7374<br>f84_1 | 100 | 17225       | 17476       | V4 | Streptococcus_mutans_ATCC_700610        | True | d__Bacteria;p__Firmicutes;c__Bacilli;o__Lactobacillales;f__Streptococcaceae;g__Streptococcus;s__Streptococcus_mutans                               | d__Bacteria;p__Firmicutes;c__Bacilli;o__Lactobacillales;f__Streptococcaceae;g__Streptococcus                           | 10661 | 4.52  |
| 65d43491988bfe5<br>57da4d86a5ba25<br>dae | f5bcb58<br>692924c<br>b7_1 | 100 | 15974<br>67 | 15972<br>15 | V4 | Staphylococcus_epidermidis_ATCC_12228   | True |                                                                                                                                                    | d__Bacteria;p__Firmicutes;c__Bacilli;o__Staphylococcales;f__Staphylococcaceae;g__Staphylococcus                        | 27015 | 11.45 |

|                                          |                            |        |            |            |    |                                                      |      |                                                                                                                                                   |                                                                                                                           |       |      |
|------------------------------------------|----------------------------|--------|------------|------------|----|------------------------------------------------------|------|---------------------------------------------------------------------------------------------------------------------------------------------------|---------------------------------------------------------------------------------------------------------------------------|-------|------|
| e3055f1b3a2ef5ff<br>e239567f02e0e75<br>8 | 58ae911<br>973b74ffc_1     | 100    | 16843      | 17094      | V4 | Streptococ<br>cus_agalac<br>tie_ATC<br>C_BAA_6<br>11 | True | d__Bacteria;p__Firmicutes;c__Bacilli;<br>o__Lactobacillales;f__Streptococcace<br>ae;g__Streptococcus;s__Streptococcu<br>s_agalactiae              | d__Bacteria;p__Firmicutes;c__Bacilli;<br>o__Lactobacillales;f__Streptococcace<br>ae;g__Streptococcus                      | 13110 | 5.55 |
| e832be098a5318<br>684958d1430526<br>7752 | 4762fdd<br>8950949<br>39_1 | 100    | 96857      | 97110      | V4 | Helicobact<br>er_pylori_<br>ATCC_700<br>392          | True | d__Bacteria;p__Campilobacterota;c__<br>_Campylobacteria;o__Campylobacte<br>rales;f__Helicobacteraceae;g__Helico<br>bacter;s__Helicobacter_pylori  | d__Bacteria;p__Campilobacterota;c__<br>_Campylobacteria;o__Campylobacte<br>rales;f__Helicobacteraceae;g__Helico<br>bacter | 5943  | 2.52 |
| 9fd9ac1df429568<br>b5d1ca6aa0b9f0<br>b34 | 071a82b<br>b90b94c<br>6f_1 | 99.213 | 18741      | 18993      | V4 | Acinetoba<br>cter_baum<br>annii_ATC<br>C_17978       | True |                                                                                                                                                   | d__Bacteria;p__Proteobacteria;c__Ga<br>mmaproteobacteria;o__Pseudomona<br>dales;f__Moraxellaceae;g__Acinetob<br>acter     | 16    | 0.01 |
| df8456a1abfb4c<br>8a2c450b44378d<br>4cb  | 89e35fec<br>1474494<br>2_1 | 100    | 52883<br>0 | 52908<br>2 | V4 | Schaalia_o<br>dontolytic<br>a_ATCC_1<br>7982         | True | d__Bacteria;p__Actinobacteriota;c__<br>Actinobacteria;o__Actinomycetales;f__<br>Actinomycetaceae;g__Actinomyce<br>s;s__Schaalia_odontolytica      | d__Bacteria;p__Actinobacteriota;c__<br>Actinobacteria;o__Actinomycetales;f__<br>Actinomycetaceae;g__Actinomyce<br>s       | 4128  | 1.75 |
| cb97fb83d4c8cc6<br>eccded352a4ca3f<br>8f | 3042186<br>b85304e<br>8d_1 | 99.605 | 9842       | 10094      | V4 | Clostridiu<br>m_beijerin<br>ckii_ATC<br>C_35702      | True | d__Bacteria;p__Firmicutes;c__Clostr<br>idia;o__Clostridiales;f__Clostridiace<br>ae;g__Clostridium_sensu_stricto_1;s__<br>Clostridium_beijerinckii | d__Bacteria;p__Firmicutes;c__Clostr<br>idia;o__Clostridiales;f__Clostridiace<br>ae;g__Clostridium_sensu_stricto_1         | 1954  | 0.83 |
| ff9d93d7b7e4678<br>7568f2d241caeaf<br>3b | 285a115<br>d88c043<br>f1_1 | 100    | 67886<br>9 | 67912<br>1 | V4 | Pseudomo<br>nas_aerugi<br>nosa_ATC<br>C_9027         | True |                                                                                                                                                   | d__Bacteria;p__Proteobacteria;c__Ga<br>mmaproteobacteria;o__Pseudomona<br>dales;f__Pseudomonadaceae;g__Pse<br>udomonas    | 5608  | 2.38 |
| 2385fe1c2dd5a3f<br>83237272a66440<br>88b | 2b7fa0e<br>1de5f42<br>de_1 | 100    | 18302<br>2 | 18327<br>4 | V4 | Deinococc<br>us_radiod<br>urans_AT<br>CC_BAA_<br>816 | True | d__Bacteria;p__Deinococcota;c__Dei<br>nococci;o__Deinococcales;f__Deinoc<br>occaceae;g__Deinococcus;s__Deinoc<br>occus_radiodurans                | d__Bacteria;p__Deinococcota;c__Dei<br>nococci;o__Deinococcales;f__Deinoc<br>occaceae;g__Deinococcus                       | 9108  | 3.86 |
| bdf8a260946246<br>22d68509a87fa75<br>ba7 | 5371a99<br>04eb643<br>61_1 | 100    | 9443       | 9695       | V4 | Bacillus_p<br>acificus_A<br>TCC_1098<br>7            | True |                                                                                                                                                   | d__Bacteria;p__Firmicutes;c__Bacilli;<br>o__Bacillales;f__Bacillaceae;g__Bacill<br>us                                     | 23458 | 9.94 |
| e21e804c8cb49a5<br>e0492b8fc545422<br>0f | 2504aeb<br>524e74d<br>25_1 | 100    | 22984<br>4 | 23009<br>6 | V4 | Porphyro<br>monas_gi<br>ngivalis_A<br>TCC_3327<br>7  | True | d__Bacteria;p__Bacteroidota;c__Bact<br>eroidia;o__Bacteroidales;f__Porphyr<br>omonadaceae;g__Porphyromonas;s__<br>_Porphyromonas_gingivalis       | d__Bacteria;p__Bacteroidota;c__Bact<br>eroidia;o__Bacteroidales;f__Porphyr<br>omonadaceae;g__Porphyromonas                | 8004  | 3.39 |
| dfc86cefa76e3e3<br>d93e7eea450e68<br>07  | 266a835<br>027f746<br>4b_2 | 100    | 38074      | 37822      | V4 | Rhodobact<br>er_sphaer<br>oides_AT<br>CC_17029       | True |                                                                                                                                                   | d__Bacteria;p__Proteobacteria;c__Al<br>phaproteobacteria;o__Rhodobacteral<br>es;f__Rhodobacteraceae;g__Rhodoba<br>cter    | 3076  | 1.30 |

|                                  |                            |        |             |             |    |                                       |      |                                                                                                                                 |                                                                                                                        |       |       |
|----------------------------------|----------------------------|--------|-------------|-------------|----|---------------------------------------|------|---------------------------------------------------------------------------------------------------------------------------------|------------------------------------------------------------------------------------------------------------------------|-------|-------|
| b2062ae94fb00a931014b67b499295a8 | d889f9d<br>d971b47<br>3d_1 | 99.605 | 34770<br>2  | 34745<br>0  | V4 | Phocaeicola_vulgaris_ATCC_8482        | True | d__Bacteria;p__Bacteroidota;c__Bacteroidia;o__Bacteroidales;f__Bacteroidaceae;g__Bacteroides;s__Bacteroides_vulgatus            | d__Bacteria;p__Bacteroidota;c__Bacteroidia;o__Bacteroidales;f__Bacteroidaceae;g__Bacteroides                           | 2269  | 0.96  |
| 1d19b18db48daa1837d18d3171334ded | f5bcb58<br>692924c<br>b7_1 | 99.605 | 15974<br>67 | 15972<br>15 | V4 | Staphylococcus_epidermidis_ATCC_12228 | True |                                                                                                                                 | d__Bacteria;p__Firmicutes;c__Bacilli;o__Staphylococcales;f__Staphylococcaceae;g__Staphylococcus                        | 2051  | 0.87  |
| 096e60ea01b8425c20593919d66c37d2 | 5371a99<br>04eb643<br>61_1 | 98.819 | 9443        | 9695        | V4 | Bacillus_pacificus_ATCC_10987         | True |                                                                                                                                 | d__Bacteria;p__Firmicutes;c__Bacilli;o__Bacillales;f__Bacillaceae;g__Bacillus                                          | 3     | 0.00  |
| 99deb3c5ecb022ec05609ebd1112a557 | d889f9d<br>d971b47<br>3d_1 | 100    | 34770<br>2  | 34745<br>0  | V4 | Phocaeicola_vulgaris_ATCC_8482        | True | d__Bacteria;p__Bacteroidota;c__Bacteroidia;o__Bacteroidales;f__Bacteroidaceae;g__Bacteroides;s__Bacteroides_vulgatus            | d__Bacteria;p__Bacteroidota;c__Bacteroidia;o__Bacteroidales;f__Bacteroidaceae;g__Bacteroides                           | 11308 | 4.79  |
| ea403646ed22d679fa4586263d8fc32f | 071a82b<br>b90b94c<br>6f_1 | 100    | 18741       | 18993       | V4 | Acinetobacter_baumannii_ATCC_17978    | True |                                                                                                                                 | d__Bacteria;p__Proteobacteria;c__Gammaproteobacteria;o__Pseudomonadales;f__Moraxellaceae;g__Acinetobacter              | 16954 | 7.18  |
| 4e8d7a4662640b90817f015280cf5713 | 3042186<br>b85304e<br>8d_1 | 100    | 9842        | 10094       | V4 | Clostridium_beijerinckii_ATCC_35702   | True |                                                                                                                                 | d__Bacteria;p__Firmicutes;c__Clostridia;o__Clostridiales;f__Clostridiaceae;g__Clostridium_sensu_stricto_1              | 30566 | 12.95 |
| 8001826dafd338cf078dd28c2eae05ed | d889f9d<br>d971b47<br>3d_1 | 99.605 | 34770<br>2  | 34745<br>0  | V4 | Phocaeicola_vulgaris_ATCC_8482        | True | d__Bacteria;p__Bacteroidota;c__Bacteroidia;o__Bacteroidales;f__Bacteroidaceae;g__Bacteroides;s__Bacteroides_vulgatus            | d__Bacteria;p__Bacteroidota;c__Bacteroidia;o__Bacteroidales;f__Bacteroidaceae;g__Bacteroides                           | 2140  | 0.91  |
| 9908fffab7ed4f3bec44cda2f5084d49 | 27b35d<br>d1651e4<br>8dd_1 | 100    | 21391<br>5  | 21416<br>7  | V4 | Enterococcus_faecalis_ATCC_47077      | True |                                                                                                                                 | d__Bacteria;p__Firmicutes;c__Bacilli;o__Lactobacillales;f__Enterococcaceae;g__Enterococcus                             | 8450  | 3.58  |
| 8224351b2abd16dd4d58c3015ff5e795 | 045df7c<br>7cb0f42<br>b5_1 | 100    | 12230<br>05 | 12227<br>53 | V4 | Neisseria_meningitidis_ATCC_BAA_335   | True | d__Bacteria;p__Proteobacteria;c__Gammaproteobacteria;o__Burkholderiales;f__Neisseriaceae;g__Neisseria;s__Neisseria_meningitidis | d__Bacteria;p__Proteobacteria;c__Gammaproteobacteria;o__Burkholderiales;f__Neisseriaceae;g__Neisseria                  | 9076  | 3.85  |
| d46e2205f0c6ecf67b51f83d111c509c | 1eb3021<br>faaec49c<br>2_1 | 100    | 45550<br>1  | 45575<br>3  | V4 | Escherichia_coli_ATCC_700926          | True |                                                                                                                                 | d__Bacteria;p__Proteobacteria;c__Gammaproteobacteria;o__Enterobacterales;f__Enterobacteriaceae;g__Escherichia-Shigella | 13582 | 5.75  |
| 0df6c802966e8670279671824da4f10a | 5964adb<br>8d0df4f<br>de_1 | 100    | 47800<br>5  | 47825<br>7  | V4 | Lactobacillus_gasseri                 | True |                                                                                                                                 | d__Bacteria;p__Firmicutes;c__Bacilli;o__Lactobacillales;f__Lactobacillaceae;g__Lactobacillus                           | 13490 | 5.72  |

|                      |           | _ATCC_33<br>323                                                                                                                                |                                                                                                                        |       |      |  |
|----------------------|-----------|------------------------------------------------------------------------------------------------------------------------------------------------|------------------------------------------------------------------------------------------------------------------------|-------|------|--|
| EU776082.1.1401      | Multiplex | d__Bacteria;p__Proteobacteria;c__Gammaproteobacteria;o__Enterobacterales;f__Enterobacteriaceae;g__Escherichia-Shigella;s__uncultured_bacterium | d__Bacteria;p__Proteobacteria;c__Gammaproteobacteria;o__Enterobacterales;f__Enterobacteriaceae;g__Escherichia-Shigella | 3     | 0.00 |  |
| MF629745.1.1219      | Multiplex | d__Bacteria;p__Proteobacteria;c__Gammaproteobacteria;o__Enterobacterales;f__Enterobacteriaceae;g__Enterobacter;s__Enterobacter_cloacae         | d__Bacteria;p__Proteobacteria;c__Gammaproteobacteria;o__Enterobacterales;f__Enterobacteriaceae;g__Enterobacter         | 6     | 0.01 |  |
| AF349929.1.1503      | Multiplex | d__Bacteria;p__Firmicutes;c__Bacilli;o__Lactobacillales;f__Enterococcaceae;g__Enterococcus;s__Enterococcus_sp.                                 | d__Bacteria;p__Firmicutes;c__Bacilli;o__Lactobacillales;f__Enterococcaceae;g__Enterococcus                             | 18    | 0.02 |  |
| CP020424.2046841.204 | Multiplex |                                                                                                                                                |                                                                                                                        | 4     | 0.00 |  |
| EU511507.1.1388_005  | Multiplex |                                                                                                                                                |                                                                                                                        | 1     | 0.00 |  |
| DQ809036.1.1400_002  | Multiplex |                                                                                                                                                |                                                                                                                        | 10.02 | 0.01 |  |
| JX426120.1.1502      | Multiplex | d__Bacteria;p__Firmicutes;c__Bacilli;o__Lactobacillales;f__Lactobacillaceae;g__Lactobacillus;s__Lactobacillus_plantarum                        | d__Bacteria;p__Firmicutes;c__Bacilli;o__Lactobacillales;f__Lactobacillaceae;g__Lactobacillus                           | 6     | 0.01 |  |
| CP019858.4077753.407 | Multiplex |                                                                                                                                                |                                                                                                                        | 3     | 0.00 |  |
| CP012650.1579871.158 | Multiplex |                                                                                                                                                |                                                                                                                        | 6     | 0.01 |  |
| KC584759.1.1459      | Multiplex | d__Bacteria;p__Proteobacteria;c__Gammaproteobacteria;o__Enterobacterales;f__Enterobacteriaceae;g__Klebsiella;s__Klebsiella_sp.                 | d__Bacteria;p__Proteobacteria;c__Gammaproteobacteria;o__Enterobacterales;f__Enterobacteriaceae;g__Klebsiella           | 2     | 0.00 |  |
| JN013122.1.1460_053  | Multiplex |                                                                                                                                                |                                                                                                                        | 1     | 0.00 |  |
| JF772072.1.1504      | Multiplex | d__Bacteria;p__Proteobacteria;c__Gammaproteobacteria;o__Enterobacterales;f__Enterobacteriaceae;g__Klebsiella;s__Klebsiella_oxytoca             | d__Bacteria;p__Proteobacteria;c__Gammaproteobacteria;o__Enterobacterales;f__Enterobacteriaceae;g__Klebsiella           | 2     | 0.00 |  |
| MF369967.1.1401      | Multiplex | d__Bacteria;p__Firmicutes;c__Bacilli;o__Lactobacillales;f__Enterococcaceae;g__Enterococcus;s__Enterococcus_faecium                             | d__Bacteria;p__Firmicutes;c__Bacilli;o__Lactobacillales;f__Enterococcaceae;g__Enterococcus                             | 2     | 0.00 |  |



|                          |           |                                                                                                                                                     |                                                                                                                             |       |      |
|--------------------------|-----------|-----------------------------------------------------------------------------------------------------------------------------------------------------|-----------------------------------------------------------------------------------------------------------------------------|-------|------|
| EU776683.1.1429          | Multiplex | d__Bacteria;p__Firmicutes;c__Bacilli;o__Lactobacillales;f__Lactobacillaceae;g__Lactobacillus;s__uncultured_bacterium                                | d__Bacteria;p__Firmicutes;c__Bacilli;o__Lactobacillales;f__Lactobacillaceae;g__Lactobacillus                                | 19    | 0.02 |
| KY228992.1.1320          | Multiplex | d__Bacteria;p__Firmicutes;c__Bacilli;o__Lactobacillales;f__Lactobacillaceae;g__Lactobacillus;s__Lactobacillus_sp.                                   | d__Bacteria;p__Firmicutes;c__Bacilli;o__Lactobacillales;f__Lactobacillaceae;g__Lactobacillus                                | 1     | 0.00 |
| LFDY01000027.1<br>24228. | Multiplex |                                                                                                                                                     |                                                                                                                             | 11    | 0.01 |
| DQ057465.1.147<br>1_001  | Multiplex |                                                                                                                                                     |                                                                                                                             | 3.19  | 0.00 |
| DQ823798.1.141<br>5      | Multiplex | d__Bacteria;p__Bacteroidota;c__Bacteroidia;o__Bacteroidales;f__Muribaculaceae;g__Muribaculaceae;s__uncultured_bacterium                             | d__Bacteria;p__Bacteroidota;c__Bacteroidia;o__Bacteroidales;f__Muribaculaceae;g__Muribaculaceae                             | 3     | 0.00 |
| EU776602.1.1302          | Multiplex | d__Bacteria;p__Firmicutes;c__Clostridia;o__Peptostreptococcales-Tissierellales;f__Peptostreptococcaceae;g__Terrisporobacter;s__uncultured_bacterium | d__Bacteria;p__Firmicutes;c__Clostridia;o__Peptostreptococcales-Tissierellales;f__Peptostreptococcaceae;g__Terrisporobacter | 25    | 0.03 |
| CP019858.10931<br>94.109 | Multiplex |                                                                                                                                                     |                                                                                                                             | 7     | 0.01 |
| AAML04000003.<br>230439. | Multiplex |                                                                                                                                                     |                                                                                                                             | 4     | 0.00 |
| KM819125.1.152<br>7      | Multiplex | d__Bacteria;p__Firmicutes;c__Bacilli;o__Lactobacillales;f__Lactobacillaceae;g__Lactobacillus;s__uncultured_Bacillus                                 | d__Bacteria;p__Firmicutes;c__Bacilli;o__Lactobacillales;f__Lactobacillaceae;g__Lactobacillus                                | 1     | 0.00 |
| EU772368.1.1408          | Multiplex | d__Bacteria;p__Firmicutes;c__Bacilli;o__Lactobacillales;f__Leuconostocaceae;g__Leuconostoc;s__uncultured_bacterium                                  | d__Bacteria;p__Firmicutes;c__Bacilli;o__Lactobacillales;f__Leuconostocaceae;g__Leuconostoc                                  | 4     | 0.00 |
| DQ002385.1.148<br>6_001  | Multiplex |                                                                                                                                                     |                                                                                                                             | 12.29 | 0.01 |
| EF096405.1.1378<br>_011  | Multiplex |                                                                                                                                                     |                                                                                                                             | 2.35  | 0.00 |
| EF406388.1.1504<br>_077  | Multiplex |                                                                                                                                                     |                                                                                                                             | 1.99  | 0.00 |
| EF097505.1.1302          | Multiplex | d__Bacteria;p__Actinobacteriota;c__Coriobacteriia;o__Coriobacteriales;f__Atopobiaceae;g__Coriobacteriaceae_UCG-002;s__uncultured_bacterium          | d__Bacteria;p__Actinobacteriota;c__Coriobacteriia;o__Coriobacteriales;f__Atopobiaceae;g__Coriobacteriaceae_UCG-002          | 1     | 0.00 |

|                            |           |                                                                                                                                                |                                                                                                                        |         |      |
|----------------------------|-----------|------------------------------------------------------------------------------------------------------------------------------------------------|------------------------------------------------------------------------------------------------------------------------|---------|------|
| EU467051.1.1321            | Multiplex | d__Bacteria;p__Firmicutes;c__Clostridia;o__Clostridiales;f__Clostridiaceae;g__Clostridium_sensu_stricto_1;s__uncultured_bacterium              | d__Bacteria;p__Firmicutes;c__Clostridia;o__Clostridiales;f__Clostridiaceae;g__Clostridium_sensu_stricto_1              | 2       | 0.00 |
| GQ416526.1.1465_001        | Multiplex |                                                                                                                                                |                                                                                                                        | 0.41    | 0.00 |
| AM286415.17506.18994_001   | Multiplex |                                                                                                                                                |                                                                                                                        | 7235.31 | 8.45 |
| GQ448270.1.1398            | Multiplex | d__Bacteria;p__Bacteroidota;c__Bacteroidia;o__Bacteroidales;f__Prevotellaceae;g__Prevotella;s__uncultured_bacterium                            | d__Bacteria;p__Bacteroidota;c__Bacteroidia;o__Bacteroidales;f__Prevotellaceae;g__Prevotella                            | 7       | 0.01 |
| CP015126.1170520.117       | Multiplex |                                                                                                                                                |                                                                                                                        | 7       | 0.01 |
| FN668375.4306350.430       | Multiplex |                                                                                                                                                |                                                                                                                        | 130     | 0.15 |
| KP641129.1.1470            | Multiplex | d__Bacteria;p__Proteobacteria;c__Gammaproteobacteria;o__Enterobacterales;f__Enterobacteriaceae;g__Escherichia-Shigella;s__uncultured_bacterium | d__Bacteria;p__Proteobacteria;c__Gammaproteobacteria;o__Enterobacterales;f__Enterobacteriaceae;g__Escherichia-Shigella | 4       | 0.00 |
| EU136678.1.2011_001        | Multiplex |                                                                                                                                                |                                                                                                                        | 4984.34 | 5.82 |
| JQ471932.1.1385            | Multiplex | d__Bacteria;p__Fusobacteriota;c__Fusobacteriia;o__Fusobacteriales;f__Fusobacteriaceae;g__Fusobacterium;s__uncultured_bacterium                 | d__Bacteria;p__Fusobacteriota;c__Fusobacteriia;o__Fusobacteriales;f__Fusobacteriaceae;g__Fusobacterium                 | 2       | 0.00 |
| HQ745021.1.1418            | Multiplex | d__Bacteria;p__Fusobacteriota;c__Fusobacteriia;o__Fusobacteriales;f__Fusobacteriaceae;g__Fusobacterium;s__uncultured_organism                  | d__Bacteria;p__Fusobacteriota;c__Fusobacteriia;o__Fusobacteriales;f__Fusobacteriaceae;g__Fusobacterium                 | 46      | 0.05 |
| CP018044.567281.5688       | Multiplex |                                                                                                                                                |                                                                                                                        | 1       | 0.00 |
| EU778419.1.1388            | Multiplex | d__Bacteria;p__Proteobacteria;c__Gammaproteobacteria;o__Enterobacterales;f__Enterobacteriaceae;g__Escherichia-Shigella;s__uncultured_bacterium | d__Bacteria;p__Proteobacteria;c__Gammaproteobacteria;o__Enterobacterales;f__Enterobacteriaceae;g__Escherichia-Shigella | 52      | 0.06 |
| CP011118.356520.358068_001 | Multiplex |                                                                                                                                                |                                                                                                                        | 183.07  | 0.21 |
| CP026598.16203.17711       | Multiplex | d__Bacteria;p__Firmicutes;c__Clostridia;o__Peptostreptococcales-Tissierellales;f__Peptostreptococcace                                          | d__Bacteria;p__Firmicutes;c__Clostridia;o__Peptostreptococcales-                                                       | 14      | 0.02 |

|                      |           |                                                                                                                                  |                                                                                                        |    |      |
|----------------------|-----------|----------------------------------------------------------------------------------------------------------------------------------|--------------------------------------------------------------------------------------------------------|----|------|
|                      |           | ae;g__Clostridioides;s__Clostridioides_difficile                                                                                 | Tissierellales;f__Peptostreptococcaceae;g__Clostridioides                                              |    |      |
| EU451868.1.1386_001  | Multiplex |                                                                                                                                  |                                                                                                        | 1  | 0.00 |
| AJ289177.1.1394      | Multiplex | d__Bacteria;p__Fusobacteriota;c__Fusobacteriia;o__Fusobacteriales;f__Fusobacteriaceae;g__Fusobacterium;s__uncultured_eubacterium | d__Bacteria;p__Fusobacteriota;c__Fusobacteriia;o__Fusobacteriales;f__Fusobacteriaceae;g__Fusobacterium | 23 | 0.03 |
| KF625184.1.1787      | Multiplex | d__Bacteria;p__Proteobacteria;c__Gammaproteobacteria;o__Enterobacteriales;f__Yersiniaceae;g__Serratia;s__Serratia_proteamaculans | d__Bacteria;p__Proteobacteria;c__Gammaproteobacteria;o__Enterobacteriales;f__Yersiniaceae;g__Serratia  | 5  | 0.01 |
| HQ798408.1.1428      | Multiplex | d__Bacteria;p__Bacteroidota;c__Bacteroidia;o__Bacteroidales;f__Bacteroidaceae;g__Bacteroides;s__uncultured_organism              | d__Bacteria;p__Bacteroidota;c__Bacteroidia;o__Bacteroidales;f__Bacteroidaceae;g__Bacteroides           | 1  | 0.00 |
| HQ818413.1.1435      | Multiplex | d__Bacteria;p__Bacteroidota;c__Bacteroidia;o__Bacteroidales;f__Bacteroidaceae;g__Bacteroides;s__uncultured_organism              | d__Bacteria;p__Bacteroidota;c__Bacteroidia;o__Bacteroidales;f__Bacteroidaceae;g__Bacteroides           | 4  | 0.00 |
| JQ477578.1.1386      | Multiplex | d__Bacteria;p__Fusobacteriota;c__Fusobacteriia;o__Fusobacteriales;f__Fusobacteriaceae;g__Fusobacterium;s__uncultured_bacterium   | d__Bacteria;p__Fusobacteriota;c__Fusobacteriia;o__Fusobacteriales;f__Fusobacteriaceae;g__Fusobacterium | 4  | 0.00 |
| KR027010.1.1568      | Multiplex | d__Bacteria;p__Firmicutes;c__Bacilli;o__Lactobacillales;f__Streptococcaceae;g__Lactococcus;s__bacterium_NXKED9                   | d__Bacteria;p__Firmicutes;c__Bacilli;o__Lactobacillales;f__Streptococcaceae;g__Lactococcus             | 5  | 0.01 |
| JX003602.1.1336      | Multiplex | d__Bacteria;p__Firmicutes;c__Bacilli;o__Lactobacillales;f__Lactobacillaceae;g__Lactobacillus;s__Lactobacillus_plantarum          | d__Bacteria;p__Firmicutes;c__Bacilli;o__Lactobacillales;f__Lactobacillaceae;g__Lactobacillus           | 15 | 0.02 |
| CP015966.2805828.280 | Multiplex |                                                                                                                                  |                                                                                                        | 9  | 0.01 |
| DQ801774.1.1401      | Multiplex | d__Bacteria;p__Bacteroidota;c__Bacteroidia;o__Bacteroidales;f__Bacteroidaceae;g__Bacteroides;s__uncultured_bacterium             | d__Bacteria;p__Bacteroidota;c__Bacteroidia;o__Bacteroidales;f__Bacteroidaceae;g__Bacteroides           | 6  | 0.01 |
| MH899355.1.1236      | Multiplex | d__Bacteria;p__Firmicutes;c__Bacilli;o__Lactobacillales;f__Lactobacillaceae;g__Lactobacillus;s__Lactobacillus_casei              | d__Bacteria;p__Firmicutes;c__Bacilli;o__Lactobacillales;f__Lactobacillaceae;g__Lactobacillus           | 4  | 0.00 |
| MUJV01000001.176.164 | Multiplex |                                                                                                                                  |                                                                                                        | 5  | 0.01 |

|                      |           |                                                                                                                                                       |                                                                                                                           |     |      |
|----------------------|-----------|-------------------------------------------------------------------------------------------------------------------------------------------------------|---------------------------------------------------------------------------------------------------------------------------|-----|------|
| EU453007.1.1441      | Multiplex | d__Bacteria;p__Firmicutes;c__Bacilli;o__Lactobacillales;f__Lactobacillaceae;g__Lactobacillus;s__uncultured_bacterium                                  | d__Bacteria;p__Firmicutes;c__Bacilli;o__Lactobacillales;f__Lactobacillaceae;g__Lactobacillus                              | 1   | 0.00 |
| CP012323.1102504.110 | Multiplex |                                                                                                                                                       |                                                                                                                           | 41  | 0.05 |
| JN559663.1.1511      | Multiplex | d__Bacteria;p__Firmicutes;c__Clostridia;o__Lachnospirales;f__Lachnospiraceae;g__Lachnospiraceae_UCG-004;s__uncultured_bacterium                       | d__Bacteria;p__Firmicutes;c__Clostridia;o__Lachnospirales;f__Lachnospiraceae;g__Lachnospiraceae_UCG-004                   | 19  | 0.02 |
| DQ818682.1.1490      | Multiplex | d__Bacteria;p__Firmicutes;c__Bacilli;o__Lactobacillales;f__Enterococcaceae;g__Enterococcus;s__uncultured_bacterium                                    | d__Bacteria;p__Firmicutes;c__Bacilli;o__Lactobacillales;f__Enterococcaceae;g__Enterococcus                                | 45  | 0.05 |
| CP028529.16107.17614 | Multiplex | d__Bacteria;p__Firmicutes;c__Clostridia;o__Peptostreptococcales-Tissierellales;f__Peptostreptococcaceae;g__Clostridioides;s__Clostridioides_difficile | d__Bacteria;p__Firmicutes;c__Clostridia;o__Peptostreptococcales-Tissierellales;f__Peptostreptococcaceae;g__Clostridioides | 112 | 0.13 |
| EU511242.1.1396_005  | Multiplex |                                                                                                                                                       |                                                                                                                           | 1   | 0.00 |
| DQ808680.1.1386      | Multiplex | d__Bacteria;p__Firmicutes;c__Clostridia;o__Oscillospirales;f__Ruminococcaceae;g__Faecalibacterium;s__uncultured_bacterium                             | d__Bacteria;p__Firmicutes;c__Clostridia;o__Oscillospirales;f__Ruminococcaceae;g__Faecalibacterium                         | 17  | 0.02 |
| DQ818104.1.1460      | Multiplex | d__Bacteria;p__Firmicutes;c__Bacilli;o__Staphylococcales;f__Staphylococcaceae;g__Staphylococcus;s__uncultured_bacterium                               | d__Bacteria;p__Firmicutes;c__Bacilli;o__Staphylococcales;f__Staphylococcaceae;g__Staphylococcus                           | 4   | 0.00 |
| GQ156444.1.1349      | Multiplex | d__Bacteria;p__Proteobacteria;c__Gammaproteobacteria;o__Enterobacterales;f__Enterobacteriaceae;g__Escherichia-Shigella;s__uncultured_bacterium        | d__Bacteria;p__Proteobacteria;c__Gammaproteobacteria;o__Enterobacterales;f__Enterobacteriaceae;g__Escherichia-Shigella    | 1   | 0.00 |
| FAGH01000127.1.1295  | Multiplex | d__Bacteria;p__Firmicutes;c__Clostridia;o__Peptostreptococcales-Tissierellales;f__Peptostreptococcaceae;g__Clostridioides;s__Clostridioides_difficile | d__Bacteria;p__Firmicutes;c__Clostridia;o__Peptostreptococcales-Tissierellales;f__Peptostreptococcaceae;g__Clostridioides | 16  | 0.02 |
| EU772591.1.1407      | Multiplex | d__Bacteria;p__Firmicutes;c__Bacilli;o__Lactobacillales;f__Streptococcaceae;g__Streptococcus;s__uncultured_bacterium                                  | d__Bacteria;p__Firmicutes;c__Bacilli;o__Lactobacillales;f__Streptococcaceae;g__Streptococcus                              | 42  | 0.05 |

|                                |           |                                                                                                                                               |                                                                                                                       |       |       |
|--------------------------------|-----------|-----------------------------------------------------------------------------------------------------------------------------------------------|-----------------------------------------------------------------------------------------------------------------------|-------|-------|
| CP012266.24417<br>1.2457       | Multiplex |                                                                                                                                               |                                                                                                                       | 2     | 0.00  |
| CQBO01000060.<br>27.1557       | Multiplex | d__Bacteria;p__Proteobacteria;c__Gammaproteobacteria;o__Enterobacterales;f__Yersiniaceae;g__Yersinia;s__Yersinia_frederiksenii                | d__Bacteria;p__Proteobacteria;c__Gammaproteobacteria;o__Enterobacterales;f__Yersiniaceae;g__Yersinia                  | 6     | 0.01  |
| GU808376.1.149<br>6            | Multiplex | d__Bacteria;p__Proteobacteria;c__Gammaproteobacteria;o__Enterobacterales;f__Erwiniaceae;g__Pantoea;s__uncultured_bacterium                    | d__Bacteria;p__Proteobacteria;c__Gammaproteobacteria;o__Enterobacterales;f__Erwiniaceae;g__Pantoea                    | 10    | 0.01  |
| GQ897892.1.148<br>1            | Multiplex | d__Bacteria;p__Firmicutes;c__Clostridia;o__Peptostreptococcales-Tissierellales;f__Peptostreptococcaceae;g__Romboutsia;s__uncultured_bacterium | d__Bacteria;p__Firmicutes;c__Clostridia;o__Peptostreptococcales-Tissierellales;f__Peptostreptococcaceae;g__Romboutsia | 15    | 0.02  |
| CP009846.39631<br>35.396       | Multiplex |                                                                                                                                               |                                                                                                                       | 28    | 0.03  |
| AM277978.1.152<br>5            | Multiplex | d__Bacteria;p__Actinobacteriota;c__Actinobacteria;o__Bifidobacteriales;f__Bifidobacteriaceae;g__Bifidobacterium;s__uncultured_bacterium       | d__Bacteria;p__Actinobacteriota;c__Actinobacteria;o__Bifidobacteriales;f__Bifidobacteriaceae;g__Bifidobacterium       | 9     | 0.01  |
| EU460412.1.1431<br>_001        | Multiplex |                                                                                                                                               |                                                                                                                       | 91.7  | 0.11  |
| CP020424.20413<br>90.204       | Multiplex |                                                                                                                                               |                                                                                                                       | 8     | 0.01  |
| EU772683.1.1391                | Multiplex | d__Bacteria;p__Firmicutes;c__Clostridia;o__Lachnospirales;f__Lachnospiraceae;g__Blautia;s__uncultured_bacterium                               | d__Bacteria;p__Firmicutes;c__Clostridia;o__Lachnospirales;f__Lachnospiraceae;g__Blautia                               | 23    | 0.03  |
| EU774926.1.1421                | Multiplex | d__Bacteria;p__Firmicutes;c__Bacilli;o__Lactobacillales;f__Lactobacillaceae;g__Lactobacillus;s__uncultured_bacterium                          | d__Bacteria;p__Firmicutes;c__Bacilli;o__Lactobacillales;f__Lactobacillaceae;g__Lactobacillus                          | 1     | 0.00  |
| GQ155746.1.135<br>9            | Multiplex | d__Bacteria;p__Firmicutes;c__Bacilli;o__Lactobacillales;f__Enterococcaceae;g__Enterococcus;s__uncultured_bacterium                            | d__Bacteria;p__Firmicutes;c__Bacilli;o__Lactobacillales;f__Enterococcaceae;g__Enterococcus                            | 3     | 0.00  |
| LF649083.20.148<br>0           | Multiplex | d__Bacteria;p__Firmicutes;c__Bacilli;o__Lactobacillales;f__Lactobacillaceae;g__Lactobacillus;s__Lactobacillus_paraplanarum                    | d__Bacteria;p__Firmicutes;c__Bacilli;o__Lactobacillales;f__Lactobacillaceae;g__Lactobacillus                          | 14    | 0.02  |
| FN665654.13832<br>7.139831_006 | Multiplex |                                                                                                                                               |                                                                                                                       | 19224 | 22.46 |

|                     |           |                                                                                                                                           |                                                                                                                 |       |      |
|---------------------|-----------|-------------------------------------------------------------------------------------------------------------------------------------------|-----------------------------------------------------------------------------------------------------------------|-------|------|
| MK045817.1.1425     | Multiplex | d__Bacteria;p__Actinobacteriota;c__Actinobacteria;o__Bifidobacteriales;f__Bifidobacteriaceae;g__Bifidobacterium;s__Bifidobacterium_longum | d__Bacteria;p__Actinobacteriota;c__Actinobacteria;o__Bifidobacteriales;f__Bifidobacteriaceae;g__Bifidobacterium | 6     | 0.01 |
| EU776680.1.1401_001 | Multiplex |                                                                                                                                           |                                                                                                                 | 16.99 | 0.02 |
| DQ814052.1.1485     | Multiplex | d__Bacteria;p__Proteobacteria;c__Gammaproteobacteria;o__Enterobacterales;f__Yersiniaceae;g__Serratia;s__uncultured_bacterium              | d__Bacteria;p__Proteobacteria;c__Gammaproteobacteria;o__Enterobacterales;f__Yersiniaceae;g__Serratia            | 14    | 0.02 |
| DQ089673.1.1505     | Multiplex | d__Bacteria;p__Proteobacteria;c__Gammaproteobacteria;o__Enterobacterales;f__Enterobacteriaceae;g__Enterobacter;s__Enterobacter_cloacae    | d__Bacteria;p__Proteobacteria;c__Gammaproteobacteria;o__Enterobacterales;f__Enterobacteriaceae;g__Enterobacter  | 2     | 0.00 |
| FJ976017.1.1357     | Multiplex | d__Bacteria;p__Firmicutes;c__Bacilli;o__Lactobacillales;f__Lactobacillaceae;g__Lactobacillus;s__uncultured_Lactobacillaceae               | d__Bacteria;p__Firmicutes;c__Bacilli;o__Lactobacillales;f__Lactobacillaceae;g__Lactobacillus                    | 1     | 0.00 |
| HQ804113.1.1452     | Multiplex | d__Bacteria;p__Bacteroidota;c__Bacteroidia;o__Bacteroidales;f__Bacteroidaceae;g__Bacteroides;s__uncultured_d__organism                    | d__Bacteria;p__Bacteroidota;c__Bacteroidia;o__Bacteroidales;f__Bacteroidaceae;g__Bacteroides                    | 12    | 0.01 |
| HQ767681.1.1432     | Multiplex | d__Bacteria;p__Bacteroidota;c__Bacteroidia;o__Bacteroidales;f__Bacteroidaceae;g__Bacteroides;s__uncultured_d__organism                    | d__Bacteria;p__Bacteroidota;c__Bacteroidia;o__Bacteroidales;f__Bacteroidaceae;g__Bacteroides                    | 27    | 0.03 |
| JF043143.1.1362     | Multiplex | d__Bacteria;p__Proteobacteria;c__Gammaproteobacteria;o__Enterobacterales;f__Enterobacteriaceae;g__Klebsiella;s__uncultured_bacterium      | d__Bacteria;p__Proteobacteria;c__Gammaproteobacteria;o__Enterobacterales;f__Enterobacteriaceae;g__Klebsiella    | 24    | 0.03 |
| DQ795160.1.1400     | Multiplex | d__Bacteria;p__Bacteroidota;c__Bacteroidia;o__Bacteroidales;f__Prevotellaceae;g__Prevotella;s__uncultured_bacterium                       | d__Bacteria;p__Bacteroidota;c__Bacteroidia;o__Bacteroidales;f__Prevotellaceae;g__Prevotella                     | 2     | 0.00 |
| EU767611.1.1349     | Multiplex | d__Bacteria;p__Actinobacteriota;c__Actinobacteria;o__Bifidobacteriales;f__Bifidobacteriaceae;g__Bifidobacterium;s__uncultured_bacterium   | d__Bacteria;p__Actinobacteriota;c__Actinobacteria;o__Bifidobacteriales;f__Bifidobacteriaceae;g__Bifidobacterium | 5     | 0.01 |
| EU467709.1.1380     | Multiplex | d__Bacteria;p__Bacteroidota;c__Bacteroidia;o__Bacteroidales;f__Bacteroidaceae;g__Bacteroides;s__uncultured_d__bacterium                   | d__Bacteria;p__Bacteroidota;c__Bacteroidia;o__Bacteroidales;f__Bacteroidaceae;g__Bacteroides                    | 9     | 0.01 |
| JQ002525.1.1373     | Multiplex | d__Bacteria;p__Actinobacteriota;c__Actinobacteria;o__Bifidobacteriales;f__Bifidobacteriaceae;g__Bifidobacterium;s__uncultured_bacterium   | d__Bacteria;p__Actinobacteriota;c__Actinobacteria;o__Bifidobacteriales;f__Bifidobacteriaceae;g__Bifidobacterium | 4     | 0.00 |

|                      |           |                                                                                                                                              |                                                                                                                 |      |      |
|----------------------|-----------|----------------------------------------------------------------------------------------------------------------------------------------------|-----------------------------------------------------------------------------------------------------------------|------|------|
|                      |           | _Bifidobacteriaceae;g__Bifidobacterium;s__Bifidobacterium_choerinum                                                                          | _Bifidobacteriaceae;g__Bifidobacterium                                                                          |      |      |
| DQ799377.1.1384      | Multiplex | d__Bacteria;p__Firmicutes;c__Clostridia;o__Oscillospirales;f__Ruminococcaceae;g__Ruminococcus;s__uncultured_bacterium                        | d__Bacteria;p__Firmicutes;c__Clostridia;o__Oscillospirales;f__Ruminococcaceae;g__Ruminococcus                   | 1    | 0.00 |
| JQ475464.1.1374      | Multiplex | d__Bacteria;p__Fusobacteriota;c__Fusobacteriia;o__Fusobacteriales;f__Fusobacteriaceae;g__Fusobacterium;s__uncultured_bacterium               | d__Bacteria;p__Fusobacteriota;c__Fusobacteriia;o__Fusobacteriales;f__Fusobacteriaceae;g__Fusobacterium          | 29   | 0.03 |
| CP017954.2756793.275 | Multiplex |                                                                                                                                              |                                                                                                                 | 1    | 0.00 |
| GQ477833.1.1442      | Multiplex | d__Bacteria;p__Proteobacteria;c__Alphaproteobacteria;o__Acetobacterales;f__Acetobacteraceae;g__Acetobacter;s__uncultured_bacterium           | d__Bacteria;p__Proteobacteria;c__Alphaproteobacteria;o__Acetobacterales;f__Acetobacteraceae;g__Acetobacter      | 14   | 0.02 |
| FPLN01008504.13.1528 | Multiplex | d__Bacteria;p__Proteobacteria;c__Gammaproteobacteria;o__Pseudomonadales;f__Pseudomonadaceae;g__Pseudomonas;s__metagenome                     | d__Bacteria;p__Proteobacteria;c__Gammaproteobacteria;o__Pseudomonadales;f__Pseudomonadaceae;g__Pseudomonas      | 1    | 0.00 |
| JQ468014.1.1391      | Multiplex | d__Bacteria;p__Bacteroidota;c__Bacteroidia;o__Flavobacteriales;f__Flavobacteriaceae;g__Capnocytophaga;s__uncultured_bacterium                | d__Bacteria;p__Bacteroidota;c__Bacteroidia;o__Flavobacteriales;f__Flavobacteriaceae;g__Capnocytophaga           | 3    | 0.00 |
| HQ800683.1.1439      | Multiplex | d__Bacteria;p__Bacteroidota;c__Bacteroidia;o__Bacteroidales;f__Bacteroidaceae;g__Bacteroides;s__uncultured_organism                          | d__Bacteria;p__Bacteroidota;c__Bacteroidia;o__Bacteroidales;f__Bacteroidaceae;g__Bacteroides                    | 14   | 0.02 |
| FJ975799.1.1361      | Multiplex | d__Bacteria;p__Firmicutes;c__Bacilli;o__Lactobacillales;f__Enterococcaceae;g__Enterococcus;s__uncultured_Lactobacillales                     | d__Bacteria;p__Firmicutes;c__Bacilli;o__Lactobacillales;f__Enterococcaceae;g__Enterococcus                      | 28   | 0.03 |
| EF097527.1.1405_001  | Multiplex |                                                                                                                                              |                                                                                                                 | 0.99 | 0.00 |
| GQ448246.1.1389      | Multiplex | d__Bacteria;p__Bacteroidota;c__Bacteroidia;o__Bacteroidales;f__Bacteroidaceae;g__Bacteroides;s__uncultured_bacterium                         | d__Bacteria;p__Bacteroidota;c__Bacteroidia;o__Bacteroidales;f__Bacteroidaceae;g__Bacteroides                    | 11   | 0.01 |
| D86186.1.1530        | Multiplex | d__Bacteria;p__Actinobacteriota;c__Actinobacteria;o__Bifidobacteriales;f__Bifidobacteriaceae;g__Bifidobacterium;s__Bifidobacterium_choerinum | d__Bacteria;p__Actinobacteriota;c__Actinobacteria;o__Bifidobacteriales;f__Bifidobacteriaceae;g__Bifidobacterium | 8    | 0.01 |

|                      |           |                                                                                                                                      |                                                                                                              |       |      |
|----------------------|-----------|--------------------------------------------------------------------------------------------------------------------------------------|--------------------------------------------------------------------------------------------------------------|-------|------|
| AB969632.1.1565      | Multiplex | d__Bacteria;p__Firmicutes;c__Bacilli;o__Lactobacillales;f__Lactobacillaceae;g__Lactobacillus;s__uncultured_bacterium                 | d__Bacteria;p__Firmicutes;c__Bacilli;o__Lactobacillales;f__Lactobacillaceae;g__Lactobacillus                 | 1     | 0.00 |
| DQ798156.1.1398      | Multiplex | d__Bacteria;p__Bacteroidota;c__Bacteroidia;o__Bacteroidales;f__Bacteroidaceae;g__Bacteroides;s__uncultured_bacterium                 | d__Bacteria;p__Bacteroidota;c__Bacteroidia;o__Bacteroidales;f__Bacteroidaceae;g__Bacteroides                 | 2     | 0.00 |
| EU458418.1.1398      | Multiplex | d__Bacteria;p__Firmicutes;c__Clostridia;o__Lachnospirales;f__Lachnospiraceae;g__[Ruminococcus]_torques_group;s__uncultured_bacterium | d__Bacteria;p__Firmicutes;c__Clostridia;o__Lachnospirales;f__Lachnospiraceae;g__[Ruminococcus]_torques_group | 38    | 0.04 |
| FN667917.1.1426      | Multiplex | d__Bacteria;p__Firmicutes;c__Bacilli;o__Lactobacillales;f__Lactobacillaceae;g__Lactobacillus;s__Lactobacillus_sp.                    | d__Bacteria;p__Firmicutes;c__Bacilli;o__Lactobacillales;f__Lactobacillaceae;g__Lactobacillus                 | 2     | 0.00 |
| JQ477027.1.1419      | Multiplex | d__Bacteria;p__Actinobacteriota;c__Actinobacteria;o__Actinomycetales;f__Actinomycetaceae;g__Actinomycetes;s__uncultured_bacterium    | d__Bacteria;p__Actinobacteriota;c__Actinobacteria;o__Actinomycetales;f__Actinomycetaceae;g__Actinomycetes    | 11    | 0.01 |
| KF842135.1.1408      | Multiplex | d__Bacteria;p__Bacteroidota;c__Bacteroidia;o__Bacteroidales;f__Bacteroidaceae;g__Bacteroides;s__uncultured_bacterium                 | d__Bacteria;p__Bacteroidota;c__Bacteroidia;o__Bacteroidales;f__Bacteroidaceae;g__Bacteroides                 | 34    | 0.04 |
| EU778419.1.1388_001  | Multiplex |                                                                                                                                      |                                                                                                              | 92.61 | 0.11 |
| EU456966.1.1435_002  | Multiplex |                                                                                                                                      |                                                                                                              | 1.16  | 0.00 |
| EU762218.1.1357      | Multiplex | d__Bacteria;p__Bacteroidota;c__Bacteroidia;o__Bacteroidales;f__Bacteroidaceae;g__Bacteroides;s__uncultured_bacterium                 | d__Bacteria;p__Bacteroidota;c__Bacteroidia;o__Bacteroidales;f__Bacteroidaceae;g__Bacteroides                 | 34    | 0.04 |
| HQ762784.1.1447_001  | Multiplex |                                                                                                                                      |                                                                                                              | 463.2 | 0.54 |
| EU560876.1.1492_014  | Multiplex |                                                                                                                                      |                                                                                                              | 11.9  | 0.01 |
| AM286415.3550757.355 | Multiplex |                                                                                                                                      |                                                                                                              | 1     | 0.00 |
| EF097373.1.1429      | Multiplex | d__Bacteria;p__Firmicutes;c__Bacilli;o__Lactobacillales;f__Lactobacillaceae;g__Lactobacillus;s__uncultured_bacterium                 | d__Bacteria;p__Firmicutes;c__Bacilli;o__Lactobacillales;f__Lactobacillaceae;g__Lactobacillus                 | 7     | 0.01 |



|                          |           |                                                                                                                                                |                                                                                                                        |       |      |
|--------------------------|-----------|------------------------------------------------------------------------------------------------------------------------------------------------|------------------------------------------------------------------------------------------------------------------------|-------|------|
| CP010888.64864<br>8.6501 | Multiplex |                                                                                                                                                |                                                                                                                        | 28    | 0.03 |
| EU511760.1.1389<br>_004  | Multiplex |                                                                                                                                                |                                                                                                                        | 1.99  | 0.00 |
| DQ794217.1.139<br>7      | Multiplex | d__Bacteria;p__Bacteroidota;c__Bacteroidia;o__Bacteroidales;f__Bacteroidaceae;g__Bacteroides;s__uncultured_bacterium                           | d__Bacteria;p__Bacteroidota;c__Bacteroidia;o__Bacteroidales;f__Bacteroidaceae;g__Bacteroides                           | 7     | 0.01 |
| EU777738.1.1370          | Multiplex | d__Bacteria;p__Firmicutes;c__Clostridia;o__Clostridiales;f__Clostridiaceae;g__Sarcina;s__uncultured_bacterium                                  | d__Bacteria;p__Firmicutes;c__Clostridia;o__Clostridiales;f__Clostridiaceae;g__Sarcina                                  | 3     | 0.00 |
| EU287343.1.1529          | Multiplex | d__Bacteria;p__Firmicutes;c__Bacilli;o__Lactobacillales;f__Lactobacillaceae;g__Lactobacillus;s__uncultured_bacterium                           | d__Bacteria;p__Firmicutes;c__Bacilli;o__Lactobacillales;f__Lactobacillaceae;g__Lactobacillus                           | 12    | 0.01 |
| EU775617.1.1401          | Multiplex | d__Bacteria;p__Proteobacteria;c__Gammaproteobacteria;o__Enterobacterales;f__Enterobacteriaceae;g__Escherichia-Shigella;s__uncultured_bacterium | d__Bacteria;p__Proteobacteria;c__Gammaproteobacteria;o__Enterobacterales;f__Enterobacteriaceae;g__Escherichia-Shigella | 37    | 0.04 |
| KF817757.1.1414          | Multiplex | d__Bacteria;p__Proteobacteria;c__Gammaproteobacteria;o__Enterobacterales;f__Yersiniaceae;g__Rahnella1;s__Rahnella_aquatilis                    | d__Bacteria;p__Proteobacteria;c__Gammaproteobacteria;o__Enterobacterales;f__Yersiniaceae;g__Rahnella1                  | 5     | 0.01 |
| EU457166.1.1396          | Multiplex | d__Bacteria;p__Bacteroidota;c__Bacteroidia;o__Bacteroidales;f__Bacteroidaceae;g__Bacteroides;s__uncultured_bacterium                           | d__Bacteria;p__Bacteroidota;c__Bacteroidia;o__Bacteroidales;f__Bacteroidaceae;g__Bacteroides                           | 2     | 0.00 |
| EU458418.1.1398<br>_015  | Multiplex |                                                                                                                                                |                                                                                                                        | 119   | 0.14 |
| KT424977.1.1468          | Multiplex | d__Bacteria;p__Proteobacteria;c__Gammaproteobacteria;o__Alteromonadales;f__Shewanellaceae;g__Shewanella;s__Shewanella_sp.                      | d__Bacteria;p__Proteobacteria;c__Gammaproteobacteria;o__Alteromonadales;f__Shewanellaceae;g__Shewanella                | 46    | 0.05 |
| CP002246.11893<br>58.119 | Multiplex |                                                                                                                                                |                                                                                                                        | 2     | 0.00 |
| BAAX01003885.<br>346.185 | Multiplex |                                                                                                                                                |                                                                                                                        | 24    | 0.03 |
| EU778512.1.1403<br>_001  | Multiplex |                                                                                                                                                |                                                                                                                        | 42.13 | 0.05 |
| CP019858.12424<br>3.1257 | Multiplex |                                                                                                                                                |                                                                                                                        | 16    | 0.02 |

|                      |           |                                                                                                                                                       |                                                                                                                           |         |      |
|----------------------|-----------|-------------------------------------------------------------------------------------------------------------------------------------------------------|---------------------------------------------------------------------------------------------------------------------------|---------|------|
| EU510219.1.1285_014  | Multiplex |                                                                                                                                                       |                                                                                                                           | 1.16    | 0.00 |
| DQ824048.1.1400_001  | Multiplex |                                                                                                                                                       |                                                                                                                           | 0.18    | 0.00 |
| AL935263.2944928.294 | Multiplex |                                                                                                                                                       |                                                                                                                           | 2       | 0.00 |
| KM819108.1.1529      | Multiplex | d__Bacteria;p__Firmicutes;c__Bacilli;o__Lactobacillales;f__Lactobacillaceae;g__Lactobacillus;s__uncultured_Bacillus                                   | d__Bacteria;p__Firmicutes;c__Bacilli;o__Lactobacillales;f__Lactobacillaceae;g__Lactobacillus                              | 1       | 0.00 |
| EU775617.1.1401_001  | Multiplex |                                                                                                                                                       |                                                                                                                           | 1896.28 | 2.22 |
| HQ818432.1.1426      | Multiplex | d__Bacteria;p__Bacteroidota;c__Bacteroidia;o__Bacteroidales;f__Bacteroidaceae;g__Bacteroides;s__uncultured_d__organism                                | d__Bacteria;p__Bacteroidota;c__Bacteroidia;o__Bacteroidales;f__Bacteroidaceae;g__Bacteroides                              | 11      | 0.01 |
| HQ774712.1.1452_001  | Multiplex |                                                                                                                                                       |                                                                                                                           | 0.3     | 0.00 |
| CP019857.10819.12310 | Multiplex | d__Bacteria;p__Firmicutes;c__Clostridia;o__Peptostreptococcales-Tissierellales;f__Peptostreptococcaceae;g__Clostridioides;s__Clostridioides_difficile | d__Bacteria;p__Firmicutes;c__Clostridia;o__Peptostreptococcales-Tissierellales;f__Peptostreptococcaceae;g__Clostridioides | 13      | 0.02 |
| CQBX01000005.209397. | Multiplex |                                                                                                                                                       |                                                                                                                           | 11      | 0.01 |
| EU451957.1.1393_001  | Multiplex |                                                                                                                                                       |                                                                                                                           | 3       | 0.00 |
| KM819135.1.1519      | Multiplex | d__Bacteria;p__Firmicutes;c__Bacilli;o__Lactobacillales;f__Lactobacillaceae;g__Lactobacillus;s__uncultured_Bacillus                                   | d__Bacteria;p__Firmicutes;c__Bacilli;o__Lactobacillales;f__Lactobacillaceae;g__Lactobacillus                              | 2       | 0.00 |
| CP022544.1495640.149 | Multiplex |                                                                                                                                                       |                                                                                                                           | 1       | 0.00 |
| CP027190.484364.4859 | Multiplex |                                                                                                                                                       |                                                                                                                           | 16      | 0.02 |
| FPLN01003709.10.1525 | Multiplex | d__Bacteria;p__Proteobacteria;c__Gammaproteobacteria;o__Pseudomonadales;f__Pseudomonadaceae;g__Pseudomonas;s__metagenome                              | d__Bacteria;p__Proteobacteria;c__Gammaproteobacteria;o__Pseudomonadales;f__Pseudomonadaceae;g__Pseudomonas                | 9       | 0.01 |
| DQ800097.1.1403      | Multiplex | d__Bacteria;p__Firmicutes;c__Clostridia;o__Lachnospirales;f__Lachnospiraceae;g__Lachnospiraceae_UCG-004;s__uncultured_bacterium                       | d__Bacteria;p__Firmicutes;c__Clostridia;o__Lachnospirales;f__Lachnospiraceae;g__Lachnospiraceae_UCG-004                   | 11      | 0.01 |

|                              |                    |        |         |         |           |                                         |      |                                                                                                                                               |                                                                                                                        |      |      |
|------------------------------|--------------------|--------|---------|---------|-----------|-----------------------------------------|------|-----------------------------------------------------------------------------------------------------------------------------------------------|------------------------------------------------------------------------------------------------------------------------|------|------|
| MH548358.1.1508              |                    |        |         |         | Multiplex |                                         |      | d__Bacteria;p__Firmicutes;c__Bacilli;o__Lactobacillales;f__Lactobacillaceae;g__Lactobacillus;s__Lactobacillus_plantarum                       | d__Bacteria;p__Firmicutes;c__Bacilli;o__Lactobacillales;f__Lactobacillaceae;g__Lactobacillus                           | 1    | 0.00 |
| JQ809309.1.1538              |                    |        |         |         | Multiplex |                                         |      | d__Bacteria;p__Firmicutes;c__Bacilli;o__Lactobacillales;f__Lactobacillaceae;g__Lactobacillus;s__uncultured_Lactobacillaceae                   | d__Bacteria;p__Firmicutes;c__Bacilli;o__Lactobacillales;f__Lactobacillaceae;g__Lactobacillus                           | 1    | 0.00 |
| EF406803.1.1509_078          |                    |        |         |         | Multiplex |                                         |      |                                                                                                                                               |                                                                                                                        | 0.02 | 0.00 |
| DQ800202.1.1374              |                    |        |         |         | Multiplex |                                         |      | d__Bacteria;p__Firmicutes;c__Clostridia;o__Oscillospirales;f__Ruminococcaceae;g__Ruminococcus;s__uncultured_bacterium                         | d__Bacteria;p__Firmicutes;c__Clostridia;o__Oscillospirales;f__Ruminococcaceae;g__Ruminococcus                          | 2    | 0.00 |
| JQ861287.1.1510_001          | 1eb3021faaec49c2_1 | 97.543 | 4584412 | 4582910 | Multiplex | Escherichia_coli_ATCC_700926            | True |                                                                                                                                               |                                                                                                                        | 0.42 | 0.00 |
| JN208201.1.1488              | 1eb3021faaec49c2_1 | 97.383 | 3660897 | 3659410 | Multiplex | Escherichia_coli_ATCC_700926            | True | d__Bacteria;p__Proteobacteria;c__Gammaproteobacteria;o__Enterobacterales;f__Enterobacteriaceae;g__Enterobacter;s__Enterobacter_sp.            | d__Bacteria;p__Proteobacteria;c__Gammaproteobacteria;o__Enterobacterales;f__Enterobacteriaceae;g__Enterobacter         | 29   | 0.03 |
| CP031558.1500822.1502336_001 | 4762fdd895094939_1 | 98.328 | 96370   | 97853   | Multiplex | Helicobacter_pylori_ATCC_700392         | True |                                                                                                                                               |                                                                                                                        | 1234 | 1.44 |
| DQ325862.1.1349              | c45a1c57adf4460e_2 | 98.298 | 23119   | 24468   | Multiplex | Bifidobacterium_adolescentis_ATCC_15703 | True | d__Bacteria;p__Actinobacteriota;c__Actinobacteria;o__Bifidobacteriales;f__Bifidobacteriaceae;g__Bifidobacterium;s__uncultured_bacterium       | d__Bacteria;p__Actinobacteriota;c__Actinobacteria;o__Bifidobacteriales;f__Bifidobacteriaceae;g__Bifidobacterium        | 3    | 0.00 |
| EU451160.1.1434_001          | 5964adb8d0df4fde_1 | 97.629 | 477450  | 478879  | Multiplex | Lactobacillus_gasseri_ATCC_33323        | True |                                                                                                                                               |                                                                                                                        | 2.15 | 0.00 |
| HQ807338.1.1448              | 1eb3021faaec49c2_1 | 98.758 | 3660866 | 3659419 | Multiplex | Escherichia_coli_ATCC_700926            | True | d__Bacteria;p__Proteobacteria;c__Gammaproteobacteria;o__Enterobacterales;f__Enterobacteriaceae;g__Escherichia-Shigella;s__uncultured_organism | d__Bacteria;p__Proteobacteria;c__Gammaproteobacteria;o__Enterobacterales;f__Enterobacteriaceae;g__Escherichia-Shigella | 4    | 0.00 |
| MH105767.1.1436              | 27b35dd1651e48dd_1 | 98.468 | 213417  | 214852  | Multiplex | Enterococcus_faecalis_ATCC_47077        | True | d__Bacteria;p__Firmicutes;c__Bacilli;o__Lactobacillales;f__Enterococcaceae;g__Enterococcus;s__Enterococcus_faecalis                           | d__Bacteria;p__Firmicutes;c__Bacilli;o__Lactobacillales;f__Enterococcaceae;g__Enterococcus                             | 25   | 0.03 |

|                                        |                            |        |             |             |           |                                                         |      |                                                                                                                                                  |                                                                                                                           |      |      |
|----------------------------------------|----------------------------|--------|-------------|-------------|-----------|---------------------------------------------------------|------|--------------------------------------------------------------------------------------------------------------------------------------------------|---------------------------------------------------------------------------------------------------------------------------|------|------|
| CP029907.37143<br>63.371               | 1eb3021<br>faaec49c<br>2_1 | 97.508 | 11525<br>80 | 11541<br>02 | Multiplex | Escherichi<br>a_coli_AT<br>CC_70092<br>6                | True |                                                                                                                                                  |                                                                                                                           | 8    | 0.01 |
| CP024019.97500.<br>99009               | 4762fdd<br>8950949<br>39_1 | 99.73  | 96370       | 97853       | Multiplex | Helicobact<br>er_pylori_<br>ATCC_700<br>392             | True | d__Bacteria;p__Campilobacterota;c__<br>_Campylobacteria;o__Campylobacte<br>rales;f__Helicobacteraceae;g__Helico<br>bacter;s__Helicobacter_pylori | d__Bacteria;p__Campilobacterota;c__<br>_Campylobacteria;o__Campylobacte<br>rales;f__Helicobacteraceae;g__Helico<br>bacter | 4    | 0.00 |
| GQ155927.1.137<br>1                    | 27b35d<br>d1651e4<br>8dd_1 | 98.939 | 21347<br>1  | 21478<br>9  | Multiplex | Enterococc<br>us_faecalis<br>_ATCC_47<br>077            | True | d__Bacteria;p__Firmicutes;c__Bacilli;<br>o__Lactobacillales;f__Enterococcacea<br>e;g__Enterococcus;s__uncultured_ba<br>cterium                   | d__Bacteria;p__Firmicutes;c__Bacilli;<br>o__Lactobacillales;f__Enterococcacea<br>e;g__Enterococcus                        | 5    | 0.01 |
| HQ762728.1.143<br>7                    | d889f9d<br>d971b47<br>3d_1 | 97.985 | 25877<br>52 | 25891<br>84 | Multiplex | Phocaeicol<br>a_vulgatu<br>s_ATCC_8<br>482              | True | d__Bacteria;p__Bacteroidota;c__Bact<br>eroidia;o__Bacteroidales;f__Bacteroi<br>daceae;g__Bacteroides;s__unculture<br>d__organism                 | d__Bacteria;p__Bacteroidota;c__Bact<br>eroidia;o__Bacteroidales;f__Bacteroi<br>daceae;g__Bacteroides                      | 4    | 0.00 |
| DQ905255.1.145<br>4                    | d889f9d<br>d971b47<br>3d_1 | 98.418 | 20954<br>69 | 20969<br>22 | Multiplex | Phocaeicol<br>a_vulgatu<br>s_ATCC_8<br>482              | True | d__Bacteria;p__Bacteroidota;c__Bact<br>eroidia;o__Bacteroidales;f__Bacteroi<br>daceae;g__Bacteroides;s__unculture<br>d__bacterium                | d__Bacteria;p__Bacteroidota;c__Bact<br>eroidia;o__Bacteroidales;f__Bacteroi<br>daceae;g__Bacteroides                      | 6    | 0.01 |
| HQ793115.1.145<br>3                    | d889f9d<br>d971b47<br>3d_1 | 98.486 | 34820<br>8  | 34682<br>2  | Multiplex | Phocaeicol<br>a_vulgatu<br>s_ATCC_8<br>482              | True | d__Bacteria;p__Bacteroidota;c__Bact<br>eroidia;o__Bacteroidales;f__Bacteroi<br>daceae;g__Bacteroides;s__unculture<br>d__organism                 | d__Bacteria;p__Bacteroidota;c__Bact<br>eroidia;o__Bacteroidales;f__Bacteroi<br>daceae;g__Bacteroides                      | 4    | 0.00 |
| MXOH01000001.<br>553880.555401_0<br>01 | 1eb3021<br>faaec49c<br>2_1 | 97.639 | 11525<br>80 | 11541<br>01 | Multiplex | Escherichi<br>a_coli_AT<br>CC_70092<br>6                | True |                                                                                                                                                  |                                                                                                                           | 0.47 | 0.00 |
| AP011943.11492<br>68.115               | 4762fdd<br>8950949<br>39_1 | 99.461 | 96370       | 97853       | Multiplex | Helicobact<br>er_pylori_<br>ATCC_700<br>392             | True |                                                                                                                                                  |                                                                                                                           | 15   | 0.02 |
| AP009256.19883<br>80.198               | c45a1c5<br>7adf446<br>0e_2 | 100    | 23099       | 24608       | Multiplex | Bifidobact<br>erium_ado<br>lescentis_<br>ATCC_157<br>03 | True |                                                                                                                                                  |                                                                                                                           | 19   | 0.02 |
| CP002246.41582<br>44.4159734_001       | 1eb3021<br>faaec49c<br>2_1 | 97.455 | 36608<br>89 | 36594<br>02 | Multiplex | Escherichi<br>a_coli_AT<br>CC_70092<br>6                | True |                                                                                                                                                  |                                                                                                                           | 0.3  | 0.00 |
| HQ774224.1.141<br>7                    | d889f9d<br>d971b47<br>3d_1 | 99.012 | 20954<br>76 | 20968<br>90 | Multiplex | Phocaeicol<br>a_vulgatu                                 | True | d__Bacteria;p__Bacteroidota;c__Bact<br>eroidia;o__Bacteroidales;f__Bacteroi                                                                      | d__Bacteria;p__Bacteroidota;c__Bact<br>eroidia;o__Bacteroidales;f__Bacteroi<br>daceae;g__Bacteroides                      | 3    | 0.00 |

|                      |                    |        |         |         |           |                                  |      |                                                                                                                                                 |                                                                                                                         |    |      |
|----------------------|--------------------|--------|---------|---------|-----------|----------------------------------|------|-------------------------------------------------------------------------------------------------------------------------------------------------|-------------------------------------------------------------------------------------------------------------------------|----|------|
|                      |                    |        |         |         |           | s_ATCC_8482                      |      | daceae;g__Bacteroides;s__uncultured_organism                                                                                                    |                                                                                                                         |    |      |
| CP009561.1275010.127 | 1eb3021faaec49c2_1 | 97.507 | 1152580 | 1154101 | Multiplex | Escherichia_coli_ATCC_700926     | True |                                                                                                                                                 |                                                                                                                         | 2  | 0.00 |
| CP030233.4191849.419 | 1eb3021faaec49c2_1 | 97.244 | 1152580 | 1154101 | Multiplex | Escherichia_coli_ATCC_700926     | True |                                                                                                                                                 |                                                                                                                         | 3  | 0.00 |
| JQ446508.1.1373      | 27b35dd1651e48dd_1 | 98.621 | 213452  | 214827  | Multiplex | Enterococcus_faecalis_ATCC_47077 | True | d__Bacteria;p__Firmicutes;c__Bacilli;o__Lactobacillales;f__Enterococcaceae;g__Enterococcus;s__Enterococcus_faecalis                             | d__Bacteria;p__Firmicutes;c__Bacilli;o__Lactobacillales;f__Enterococcaceae;g__Enterococcus                              | 2  | 0.00 |
| CP029992.3310618.331 | 1eb3021faaec49c2_1 | 97.636 | 1152580 | 1154101 | Multiplex | Escherichia_coli_ATCC_700926     | True |                                                                                                                                                 |                                                                                                                         | 1  | 0.00 |
| CP011975.2004273.200 |                    |        |         |         | Multiplex |                                  |      |                                                                                                                                                 |                                                                                                                         | 2  | 0.00 |
| KM506787.1.1448      |                    |        |         |         | Multiplex |                                  |      | d__Bacteria;p__Firmicutes;c__Bacilli;o__Lactobacillales;f__Lactobacillaceae;g__Lactobacillus;s__Lactobacillus_plantarum                         | d__Bacteria;p__Firmicutes;c__Bacilli;o__Lactobacillales;f__Lactobacillaceae;g__Lactobacillus                            | 2  | 0.00 |
| CP009712.4129838.413 |                    |        |         |         | Multiplex |                                  |      |                                                                                                                                                 |                                                                                                                         | 7  | 0.01 |
| EU777753.1.1312      |                    |        |         |         | Multiplex |                                  |      | d__Bacteria;p__Proteobacteria;c__Gammaproteobacteria;o__Enterobacteriales;f__Enterobacteriaceae;g__Escherichia-Shigella;s__uncultured_bacterium | d__Bacteria;p__Proteobacteria;c__Gammaproteobacteria;o__Enterobacteriales;f__Enterobacteriaceae;g__Escherichia-Shigella | 5  | 0.01 |
| EU767274.1.1360      |                    |        |         |         | Multiplex |                                  |      | d__Bacteria;p__Actinobacteriota;c__Actinobacteria;o__Bifidobacteriales;f__Bifidobacteriaceae;g__Bifidobacterium;s__uncultured_bacterium         | d__Bacteria;p__Actinobacteriota;c__Actinobacteria;o__Bifidobacteriales;f__Bifidobacteriaceae;g__Bifidobacterium         | 6  | 0.01 |
| AJKY01000083.3720.52 |                    |        |         |         | Multiplex |                                  |      |                                                                                                                                                 |                                                                                                                         | 21 | 0.02 |
| FN665654.138327.1398 |                    |        |         |         | Multiplex |                                  |      |                                                                                                                                                 |                                                                                                                         | 12 | 0.01 |
| HQ761701.1.1434      |                    |        |         |         | Multiplex |                                  |      | d__Bacteria;p__Bacteroidota;c__Bacteroidia;o__Bacteroidales;f__Bacteroidaceae;g__Bacteroides;s__uncultured_organism                             | d__Bacteria;p__Bacteroidota;c__Bacteroidia;o__Bacteroidales;f__Bacteroidaceae;g__Bacteroides                            | 3  | 0.00 |

|                      |                            |        |             |             |           |                                         |      |                                                                                                                                                      |                                                                                                                          |         |      |
|----------------------|----------------------------|--------|-------------|-------------|-----------|-----------------------------------------|------|------------------------------------------------------------------------------------------------------------------------------------------------------|--------------------------------------------------------------------------------------------------------------------------|---------|------|
| EU454583.1.1411_019  |                            |        |             |             | Multiplex |                                         |      |                                                                                                                                                      |                                                                                                                          | 2.99    | 0.00 |
| CP028526.334281.3357 |                            |        |             |             | Multiplex |                                         |      |                                                                                                                                                      |                                                                                                                          | 35      | 0.04 |
| CQEC01000020.91536.9 |                            |        |             |             | Multiplex |                                         |      |                                                                                                                                                      |                                                                                                                          | 28      | 0.03 |
| AY634580.1.1308      |                            |        |             |             | Multiplex |                                         |      | d__Bacteria;p__Campilobacterota;c__Campylobacteria;o__Campylobacterales;f__Helicobacteraceae;g__Helicobacter;s__uncultured_Helicobacter              | d__Bacteria;p__Campilobacterota;c__Campylobacteria;o__Campylobacterales;f__Helicobacteraceae;g__Helicobacter             | 28      | 0.03 |
| CP009364.3139876.314 |                            |        |             |             | Multiplex |                                         |      |                                                                                                                                                      |                                                                                                                          | 17      | 0.02 |
| DQ797217.1.1403      |                            |        |             |             | Multiplex |                                         |      | d__Bacteria;p__Bacteroidota;c__Bacteroidia;o__Bacteroidales;f__Bacteroidaceae;g__Bacteroides;s__uncultured_bacterium                                 | d__Bacteria;p__Bacteroidota;c__Bacteroidia;o__Bacteroidales;f__Bacteroidaceae;g__Bacteroides                             | 9       | 0.01 |
| CP012323.10819.12309 |                            |        |             |             | Multiplex |                                         |      | d__Bacteria;p__Firmicutes;c__Clostridia;o__Peptostreptococcales-Tissierellales;f__Peptostreptococaceae;g__Clostridioides;s__Clostridioides_difficile | d__Bacteria;p__Firmicutes;c__Clostridia;o__Peptostreptococcales-Tissierellales;f__Peptostreptococaceae;g__Clostridioides | 7       | 0.01 |
| HQ810958.1.1447_001  | d889f9d<br>d971b47<br>3d_1 | 98.135 | 34819<br>7  | 34675<br>9  | Multiplex | Phocaeicola_vulgatus_ATCC_8482          | True |                                                                                                                                                      |                                                                                                                          | 0.32    | 0.00 |
| HQ793333.1.1443      | 1eb3021<br>faaec49c<br>2_1 | 99.422 | 36608<br>81 | 36594<br>98 | Multiplex | Escherichia_coli_ATCC_700926            | True | d__Bacteria;p__Proteobacteria;c__Gammaproteobacteria;o__Enterobacteriales;f__Enterobacteriaceae;g__Escherichia-Shigella;s__uncultured_organism       | d__Bacteria;p__Proteobacteria;c__Gammaproteobacteria;o__Enterobacteriales;f__Enterobacteriaceae;g__Escherichia-Shigella  | 9       | 0.01 |
| JQ187021.1.1359      | c45a1c5<br>7adf446<br>0e_1 | 97.277 | 18501<br>47 | 18488<br>01 | Multiplex | Bifidobacterium_adolescentis_ATCC_15703 | True | d__Bacteria;p__Actinobacteriota;c__Actinobacteria;o__Bifidobacteriales;f__Bifidobacteriaceae;g__Bifidobacterium;s__uncultured_bacterium              | d__Bacteria;p__Actinobacteriota;c__Actinobacteria;o__Bifidobacteriales;f__Bifidobacteriaceae;g__Bifidobacterium          | 47      | 0.05 |
| AF506794.1.1466      | 4762fdd<br>8950949<br>39_1 | 97.614 | 96370       | 97835       | Multiplex | Helicobacter_pylori_ATCC_700392         | True | d__Bacteria;p__Campilobacterota;c__Campylobacteria;o__Campylobacterales;f__Helicobacteraceae;g__Helicobacter;s__Helicobacter_heilmannii              | d__Bacteria;p__Campilobacterota;c__Campylobacteria;o__Campylobacterales;f__Helicobacteraceae;g__Helicobacter             | 1       | 0.00 |
| EU655795.1.1320_001  |                            |        |             |             | Multiplex |                                         |      |                                                                                                                                                      |                                                                                                                          | 1       | 0.00 |
| HQ741049.1.1434_001  | d889f9d<br>d971b47<br>3d_1 | 98.953 | 47445<br>93 | 47431<br>63 | Multiplex | Phocaeicola_vulgatus                    | True |                                                                                                                                                      |                                                                                                                          | 6718.65 | 7.85 |

|                              |                    |        |         |         |           |                                         |      |                                                                                                                               |                                                                                                                 |         |      |
|------------------------------|--------------------|--------|---------|---------|-----------|-----------------------------------------|------|-------------------------------------------------------------------------------------------------------------------------------|-----------------------------------------------------------------------------------------------------------------|---------|------|
|                              |                    |        |         |         |           | s_ATCC_8482                             |      |                                                                                                                               |                                                                                                                 |         |      |
| HQ802459.1.1485_001          | 27b35dd1651e48dd_1 | 98.991 | 213399  | 214884  | Multiplex | Enterococcus_faecalis_ATCC_47077        | True |                                                                                                                               |                                                                                                                 | 0.18    | 0.00 |
| KF843118.1.1413_009          | 1eb3021faaec49c2_1 | 97.013 | 3660907 | 3659509 | Multiplex | Escherichia_coli_ATCC_700926            | True |                                                                                                                               |                                                                                                                 | 2.79    | 0.00 |
| EU136687.1.1985              | d889f9dd971b473d_1 | 100    | 2095444 | 2096948 | Multiplex | Phocaeicola_vulgaris_ATCC_8482          | True | d__Bacteria;p__Bacteroidota;c__Bacteroidia;o__Bacteroidales;f__Bacteroidaceae;g__Bacteroides;s__Bacteroides_vulgatus          | d__Bacteria;p__Bacteroidota;c__Bacteroidia;o__Bacteroidales;f__Bacteroidaceae;g__Bacteroides                    | 2       | 0.00 |
| HQ771701.1.1438_001          | d889f9dd971b473d_1 | 98.956 | 348191  | 346759  | Multiplex | Phocaeicola_vulgaris_ATCC_8482          | True |                                                                                                                               |                                                                                                                 | 0.3     | 0.00 |
| FPLO01005702.1.1404          | c45a1c57adf4460e_2 | 99.004 | 23204   | 24608   | Multiplex | Bifidobacterium_adolescentis_ATCC_15703 | True | d__Bacteria;p__Actinobacteriota;c__Actinobacteria;o__Bifidobacteriales;f__Bifidobacteriaceae;g__Bifidobacterium;s__metagenome | d__Bacteria;p__Actinobacteriota;c__Actinobacteria;o__Bifidobacteriales;f__Bifidobacteriaceae;g__Bifidobacterium | 24      | 0.03 |
| CP029595.3631004.363         | 1eb3021faaec49c2_1 | 97.244 | 1152580 | 1154101 | Multiplex | Escherichia_coli_ATCC_700926            | True |                                                                                                                               |                                                                                                                 | 5       | 0.01 |
| CP022712.1786281.1787846_001 | 27b35dd1651e48dd_1 | 99.351 | 213371  | 214911  | Multiplex | Enterococcus_faecalis_ATCC_47077        | True |                                                                                                                               |                                                                                                                 | 2978.78 | 3.48 |
| CP030236.2819838.2821391_004 | 1eb3021faaec49c2_1 | 97.967 | 1152580 | 1154101 | Multiplex | Escherichia_coli_ATCC_700926            | True |                                                                                                                               |                                                                                                                 | 0.39    | 0.00 |
| HQ810947.1.1443              | d889f9dd971b473d_1 | 98.406 | 348195  | 346760  | Multiplex | Phocaeicola_vulgaris_ATCC_8482          | True | d__Bacteria;p__Bacteroidota;c__Bacteroidia;o__Bacteroidales;f__Bacteroidaceae;g__Bacteroides;s__uncultured_organism           | d__Bacteria;p__Bacteroidota;c__Bacteroidia;o__Bacteroidales;f__Bacteroidaceae;g__Bacteroides                    | 27      | 0.03 |
| CP030838.463295.464833_001   | 1eb3021faaec49c2_1 | 97.246 | 454975  | 456496  | Multiplex | Escherichia_coli_ATCC_700926            | True |                                                                                                                               |                                                                                                                 | 107.97  | 0.13 |

|                                  |                            |        |             |             |           |                                                         |      |                                                                                                                                 |                                                                                                    |             |      |
|----------------------------------|----------------------------|--------|-------------|-------------|-----------|---------------------------------------------------------|------|---------------------------------------------------------------------------------------------------------------------------------|----------------------------------------------------------------------------------------------------|-------------|------|
| CP012268.31240<br>33.3125588_001 | 1eb3021<br>faaec49c<br>2_1 | 97.375 | 36609<br>09 | 36593<br>88 | Multiplex | Escherichi<br>a_coli_AT<br>CC_70092<br>6                | True |                                                                                                                                 |                                                                                                    | 2929.<br>26 | 3.42 |
| EU723852.1.1527<br>_001          | 27b35d<br>d1651e4<br>8dd_1 | 99.147 | 21337<br>4  | 21488<br>9  | Multiplex | Enterococc<br>us_faecalis<br>_ATCC_47<br>077            | True |                                                                                                                                 |                                                                                                    | 0.18        | 0.00 |
| ABAK02000001.<br>2157381         | 1eb3021<br>faaec49c<br>2_1 | 97.705 | 36609<br>09 | 36593<br>88 | Multiplex | Escherichi<br>a_coli_AT<br>CC_70092<br>6                | True |                                                                                                                                 |                                                                                                    | 2           | 0.00 |
| JN981928.1.1516<br>_004          | 1eb3021<br>faaec49c<br>2_1 | 98.809 | 36609<br>09 | 36594<br>04 | Multiplex | Escherichi<br>a_coli_AT<br>CC_70092<br>6                | True |                                                                                                                                 |                                                                                                    | 0.2         | 0.00 |
| D86197.1.1437_0<br>01            | c45a1c5<br>7adf446<br>0e_2 | 99.087 | 23185       | 24608       | Multiplex | Bifidobact<br>erium_ado<br>lescentis_<br>ATCC_157<br>03 | True |                                                                                                                                 |                                                                                                    | 6048.<br>81 | 7.07 |
| CP026197.41704<br>8.4185         | 1eb3021<br>faaec49c<br>2_1 | 97.113 | 11525<br>80 | 11541<br>01 | Multiplex | Escherichi<br>a_coli_AT<br>CC_70092<br>6                | True |                                                                                                                                 |                                                                                                    | 2           | 0.00 |
| AJ301831.1.1554                  | 27b35d<br>d1651e4<br>8dd_1 | 99.676 | 21337<br>1  | 21491<br>1  | Multiplex | Enterococc<br>us_faecalis<br>_ATCC_47<br>077            | True | d__Bacteria;p__Firmicutes;c__Bacilli;<br>o__Lactobacillales;f__Enterococcacea<br>e;g__Enterococcus;s__Enterococcus_<br>faecalis | d__Bacteria;p__Firmicutes;c__Bacilli;<br>o__Lactobacillales;f__Enterococcacea<br>e;g__Enterococcus | 14          | 0.02 |
| CP023005.20081<br>38.200         | c45a1c5<br>7adf446<br>0e_1 | 99.934 | 18501<br>67 | 18486<br>61 | Multiplex | Bifidobact<br>erium_ado<br>lescentis_<br>ATCC_157<br>03 | True |                                                                                                                                 |                                                                                                    | 44          | 0.05 |
| AP011945.11762<br>63.117         | 4762fdd<br>8950949<br>39_1 | 99.663 | 96370       | 97853       | Multiplex | Helicobact<br>er_pylori_<br>ATCC_700<br>392             | True |                                                                                                                                 |                                                                                                    | 4           | 0.00 |
| CXRJ01000078.4<br>200.57         | 27b35d<br>d1651e4<br>8dd_1 | 97.542 | 21337<br>1  | 21491<br>1  | Multiplex | Enterococc<br>us_faecalis<br>_ATCC_47<br>077            | True |                                                                                                                                 |                                                                                                    | 7           | 0.01 |



|                          |                            |        |             |             |           |                                                         |      |                                                                                                                                                                 |                                                                                                                                    |    |      |
|--------------------------|----------------------------|--------|-------------|-------------|-----------|---------------------------------------------------------|------|-----------------------------------------------------------------------------------------------------------------------------------------------------------------|------------------------------------------------------------------------------------------------------------------------------------|----|------|
| HQ778631.1.143<br>3      | d889f9d<br>d971b47<br>3d_1 | 97.491 | 25877<br>64 | 25891<br>93 | Multiplex | Phocaeicol<br>a_vulgatu<br>s_ATCC_8<br>482              | True | d__Bacteria;p__Bacteroidota;c__Bact<br>eroidia;o__Bacteroidales;f__Bacteroi<br>daceae;g__Bacteroides;s__unculture<br>d_organism                                 | d__Bacteria;p__Bacteroidota;c__Bact<br>eroidia;o__Bacteroidales;f__Bacteroi<br>daceae;g__Bacteroides                               | 6  | 0.01 |
| HQ814803.1.145<br>3      | d889f9d<br>d971b47<br>3d_1 | 98.986 | 44319<br>36 | 44305<br>57 | Multiplex | Phocaeicol<br>a_vulgatu<br>s_ATCC_8<br>482              | True | d__Bacteria;p__Bacteroidota;c__Bact<br>eroidia;o__Bacteroidales;f__Bacteroi<br>daceae;g__Bacteroides;s__unculture<br>d_organism                                 | d__Bacteria;p__Bacteroidota;c__Bact<br>eroidia;o__Bacteroidales;f__Bacteroi<br>daceae;g__Bacteroides                               | 2  | 0.00 |
| CP026807.33419<br>63.334 | 1eb3021<br>faaec49c<br>2_1 | 99.671 | 11525<br>80 | 11541<br>01 | Multiplex | Escherichi<br>a_coli_AT<br>CC_70092<br>6                | True |                                                                                                                                                                 |                                                                                                                                    | 2  | 0.00 |
| AP012600.14327<br>22.143 | 4762fdd<br>8950949<br>39_1 | 99.73  | 96370       | 97853       | Multiplex | Helicobact<br>er_pylori_<br>ATCC_700<br>392             | True |                                                                                                                                                                 |                                                                                                                                    | 4  | 0.00 |
| HQ739773.1.144<br>2      | 1eb3021<br>faaec49c<br>2_1 | 99.141 | 11525<br>96 | 11539<br>91 | Multiplex | Escherichi<br>a_coli_AT<br>CC_70092<br>6                | True | d__Bacteria;p__Proteobacteria;c__Ga<br>mmaproteobacteria;o__Enterobacter<br>ales;f__Enterobacteriaceae;g__Escher<br>ichia-Shigella;s__uncultured_bacterium      | d__Bacteria;p__Proteobacteria;c__Ga<br>mmaproteobacteria;o__Enterobacter<br>ales;f__Enterobacteriaceae;g__Escher<br>ichia-Shigella | 2  | 0.00 |
| LT558811.1.1486          | c45a1c5<br>7adf446<br>0e_1 | 99.048 | 18501<br>54 | 18486<br>85 | Multiplex | Bifidobact<br>erium_ado<br>lescentis_<br>ATCC_157<br>03 | True | d__Bacteria;p__Actinobacteriota;c__<br>Actinobacteria;o__Bifidobacteriales;f__<br>Bifidobacteriaceae;g__Bifidobacter<br>ium;s__Bifidobacterium_adolescenti<br>s | d__Bacteria;p__Actinobacteriota;c__<br>Actinobacteria;o__Bifidobacteriales;f__<br>Bifidobacteriaceae;g__Bifidobacter<br>ium        | 9  | 0.01 |
| CP015574.38546<br>79.385 | 1eb3021<br>faaec49c<br>2_1 | 97.31  | 11525<br>80 | 11541<br>01 | Multiplex | Escherichi<br>a_coli_AT<br>CC_70092<br>6                | True |                                                                                                                                                                 |                                                                                                                                    | 3  | 0.00 |
| CP022712.17862<br>81.178 | 27b35d<br>d1651e4<br>8dd_1 | 99.351 | 21337<br>1  | 21491<br>1  | Multiplex | Enterococc<br>us_faecalis<br>_ATCC_47<br>077            | True |                                                                                                                                                                 |                                                                                                                                    | 33 | 0.04 |
| AY634599.1.1307          | 4762fdd<br>8950949<br>39_1 | 99.375 | 96471       | 97750       | Multiplex | Helicobact<br>er_pylori_<br>ATCC_700<br>392             | True | d__Bacteria;p__Campilobacterota;c__<br>_Campylobacteria;o__Campylobacte<br>rales;f__Helicobacteraceae;g__Helico<br>bacter;s__uncultured_Helicobacter            | d__Bacteria;p__Campilobacterota;c__<br>_Campylobacteria;o__Campylobacte<br>rales;f__Helicobacteraceae;g__Helico<br>bacter          | 1  | 0.00 |
| CP030235.20500<br>34.205 | 1eb3021<br>faaec49c<br>2_1 | 97.31  | 11525<br>80 | 11541<br>01 | Multiplex | Escherichi<br>a_coli_AT<br>CC_70092<br>6                | True |                                                                                                                                                                 |                                                                                                                                    | 3  | 0.00 |

|                      |                            |        |             |             |           |                                         |      |                                                                                                                                                 |                                                                                                                 |      |      |
|----------------------|----------------------------|--------|-------------|-------------|-----------|-----------------------------------------|------|-------------------------------------------------------------------------------------------------------------------------------------------------|-----------------------------------------------------------------------------------------------------------------|------|------|
| HQ815539.1.1438      | d889f9d<br>d971b47<br>3d_1 | 98.329 | 25877<br>42 | 25891<br>69 | Multiplex | Phocaeicola_vulgatus_ATCC_8482          | True | d__Bacteria;p__Bacteroidota;c__Bacteroidia;o__Bacteroidales;f__Bacteroidaceae;g__Bacteroides;s__uncultured_organism                             | d__Bacteria;p__Bacteroidota;c__Bacteroidia;o__Bacteroidales;f__Bacteroidaceae;g__Bacteroides                    | 5    | 0.01 |
| CP022139.4711002.471 | 1eb3021<br>faaec49c<br>2_1 | 97.244 | 11525<br>80 | 11541<br>01 | Multiplex | Escherichia_coli_ATCC_700926            | True |                                                                                                                                                 |                                                                                                                 | 7    | 0.01 |
| CP010437.2145122.214 | c45a1c5<br>7adf446<br>0e_2 | 98.844 | 23099       | 24566       | Multiplex | Bifidobacterium_adolescentis_ATCC_15703 | True |                                                                                                                                                 |                                                                                                                 | 3    | 0.00 |
| EU456992.1.1435_002  | 5964adb<br>8d0df4f<br>de_1 | 98.259 | 47745<br>0  | 47887<br>9  | Multiplex | Lactobacillus_gasseri_ATCC_33323        | True |                                                                                                                                                 |                                                                                                                 | 0.02 | 0.00 |
| CP026325.1211466.121 | 4762fdd<br>8950949<br>39_1 | 100    | 96370       | 97853       | Multiplex | Helicobacter_pylori_ATCC_700392         | True |                                                                                                                                                 |                                                                                                                 | 3    | 0.00 |
| EU764185.1.1352      | c45a1c5<br>7adf446<br>0e_1 | 98.816 | 18501<br>47 | 18488<br>02 | Multiplex | Bifidobacterium_adolescentis_ATCC_15703 | True | d__Bacteria;p__Actinobacteriota;c__Actinobacteria;o__Bifidobacteriales;f__Bifidobacteriaceae;g__Bifidobacterium;s__uncultured_bacterium         | d__Bacteria;p__Actinobacteriota;c__Actinobacteria;o__Bifidobacteriales;f__Bifidobacteriaceae;g__Bifidobacterium | 37   | 0.04 |
| FJ611793.1.1416      | c45a1c5<br>7adf446<br>0e_1 | 98.804 | 18501<br>47 | 18487<br>29 | Multiplex | Bifidobacterium_adolescentis_ATCC_15703 | True | d__Bacteria;p__Actinobacteriota;c__Actinobacteria;o__Bifidobacteriales;f__Bifidobacteriaceae;g__Bifidobacterium;s__Bifidobacterium_adolescentis | d__Bacteria;p__Actinobacteriota;c__Actinobacteria;o__Bifidobacteriales;f__Bifidobacteriaceae;g__Bifidobacterium | 9    | 0.01 |
| GQ155993.1.1370      | 27b35d<br>d1651e4<br>8dd_1 | 97.801 | 21347<br>1  | 21478<br>9  | Multiplex | Enterococcus_faecalis_ATCC_47077        | True | d__Bacteria;p__Firmicutes;c__Bacilli;o__Lactobacillales;f__Enterococcaceae;g__Enterococcus;s__uncultured_bacterium                              | d__Bacteria;p__Firmicutes;c__Bacilli;o__Lactobacillales;f__Enterococcaceae;g__Enterococcus                      | 5    | 0.01 |
| AY850534.1.1248      |                            |        |             |             | Multiplex |                                         |      | d__Bacteria;p__Actinobacteriota;c__Actinobacteria;o__Bifidobacteriales;f__Bifidobacteriaceae;g__Bifidobacterium;s__uncultured_bacterium         | d__Bacteria;p__Actinobacteriota;c__Actinobacteria;o__Bifidobacteriales;f__Bifidobacteriaceae;g__Bifidobacterium | 3    | 0.00 |
| HQ765079.1.1455      |                            |        |             |             | Multiplex |                                         |      | d__Bacteria;p__Bacteroidota;c__Bacteroidia;o__Bacteroidales;f__Bacteroidaceae;g__Bacteroides;s__uncultured_organism                             | d__Bacteria;p__Bacteroidota;c__Bacteroidia;o__Bacteroidales;f__Bacteroidaceae;g__Bacteroides                    | 4    | 0.00 |

|                         |           |                                                                                                                                                |                                                                                                                        |       |      |
|-------------------------|-----------|------------------------------------------------------------------------------------------------------------------------------------------------|------------------------------------------------------------------------------------------------------------------------|-------|------|
| FPLN01001016.2<br>.1422 | Multiplex | d__Bacteria;p__Proteobacteria;c__Gammaproteobacteria;o__Pseudomonadales;f__Pseudomonadaceae;g__Pseudomonas;s__metagenome                       | d__Bacteria;p__Proteobacteria;c__Gammaproteobacteria;o__Pseudomonadales;f__Pseudomonadaceae;g__Pseudomonas             | 9     | 0.01 |
| AJ133496.1.1479         | Multiplex | d__Bacteria;p__Fusobacteriota;c__Fusobacteriia;o__Fusobacteriales;f__Fusobacteriaceae;g__Fusobacterium;s__Fusobacterium_nucleatum              | d__Bacteria;p__Fusobacteriota;c__Fusobacteriia;o__Fusobacteriales;f__Fusobacteriaceae;g__Fusobacterium                 | 67    | 0.08 |
| KC011147.1.1494<br>_005 | Multiplex |                                                                                                                                                |                                                                                                                        | 85.34 | 0.10 |
| EU775002.1.1308         | Multiplex | d__Bacteria;p__Firmicutes;c__Clostridia;o__Oscillospirales;f__UCG-011;g__UCG-011;s__uncultured_bacterium                                       | d__Bacteria;p__Firmicutes;c__Clostridia;o__Oscillospirales;f__UCG-011;g__UCG-011                                       | 4     | 0.00 |
| EU463378.1.1375         | Multiplex | d__Bacteria;p__Firmicutes;c__Clostridia;o__Clostridiales;f__Clostridiaceae;g__Clostridium_sensu_stricto_1;s__uncultured_bacterium              | d__Bacteria;p__Firmicutes;c__Clostridia;o__Clostridiales;f__Clostridiaceae;g__Clostridium_sensu_stricto_1              | 4     | 0.00 |
| DQ345464.1.152<br>3     | Multiplex | d__Bacteria;p__Firmicutes;c__Bacilli;o__Lactobacillales;f__Enterococcaceae;g__Tetragenococcus;s__uncultured_compost                            | d__Bacteria;p__Firmicutes;c__Bacilli;o__Lactobacillales;f__Enterococcaceae;g__Tetragenococcus                          | 6     | 0.01 |
| AJ621551.1.1466         | Multiplex | d__Bacteria;p__Firmicutes;c__Bacilli;o__Lactobacillales;f__Lactobacillaceae;g__Lactobacillus;s__Lactobacillus_graminis                         | d__Bacteria;p__Firmicutes;c__Bacilli;o__Lactobacillales;f__Lactobacillaceae;g__Lactobacillus                           | 5     | 0.01 |
| EU776535.1.1401         | Multiplex | d__Bacteria;p__Proteobacteria;c__Gammaproteobacteria;o__Enterobacterales;f__Enterobacteriaceae;g__Escherichia-Shigella;s__uncultured_bacterium | d__Bacteria;p__Proteobacteria;c__Gammaproteobacteria;o__Enterobacterales;f__Enterobacteriaceae;g__Escherichia-Shigella | 15    | 0.02 |
| MH392797.1.148<br>8     | Multiplex | d__Bacteria;p__Firmicutes;c__Bacilli;o__Lactobacillales;f__Lactobacillaceae;g__Lactobacillus;s__Lactobacillus_plantarum                        | d__Bacteria;p__Firmicutes;c__Bacilli;o__Lactobacillales;f__Lactobacillaceae;g__Lactobacillus                           | 22    | 0.03 |
| MG028631.1.145<br>4     | Multiplex | d__Bacteria;p__Actinobacteriota;c__Actinobacteria;o__Bifidobacteriales;f__Bifidobacteriaceae;g__Bifidobacterium;s__Bifidobacterium_sp.         | d__Bacteria;p__Actinobacteriota;c__Actinobacteria;o__Bifidobacteriales;f__Bifidobacteriaceae;g__Bifidobacterium        | 1     | 0.00 |
| HQ778752.1.142<br>9     | Multiplex | d__Bacteria;p__Bacteroidota;c__Bacteroidia;o__Bacteroidales;f__Bacteroidaceae;g__Bacteroides;s__uncultured_organism                            | d__Bacteria;p__Bacteroidota;c__Bacteroidia;o__Bacteroidales;f__Bacteroidaceae;g__Bacteroides                           | 3     | 0.00 |

|                                      |           |                                                                                                                                                       |                                                                                                                           |              |       |
|--------------------------------------|-----------|-------------------------------------------------------------------------------------------------------------------------------------------------------|---------------------------------------------------------------------------------------------------------------------------|--------------|-------|
| FN538970.13462<br>9.1361             | Multiplex |                                                                                                                                                       |                                                                                                                           | 6            | 0.01  |
| DQ015435.1.134<br>1_001              | Multiplex |                                                                                                                                                       |                                                                                                                           | 1            | 0.00  |
| CP002246.16659<br>3.1680             | Multiplex |                                                                                                                                                       |                                                                                                                           | 8            | 0.01  |
| HQ806906.1.143<br>7                  | Multiplex | d__Bacteria;p__Bacteroidota;c__Bacteroidia;o__Bacteroidales;f__Bacteroidaceae;g__Bacteroides;s__uncultured_organism                                   | d__Bacteria;p__Bacteroidota;c__Bacteroidia;o__Bacteroidales;f__Bacteroidaceae;g__Bacteroides                              | 7            | 0.01  |
| JF766405.1.1514_001                  | Multiplex |                                                                                                                                                       |                                                                                                                           | 15596<br>.18 | 18.22 |
| EF179833.1.1502                      | Multiplex | d__Bacteria;p__Proteobacteria;c__Gammaproteobacteria;o__Enterobacterales;f__Enterobacteriaceae;g__Klebsiella;s__uncultured_bacterium                  | d__Bacteria;p__Proteobacteria;c__Gammaproteobacteria;o__Enterobacterales;f__Enterobacteriaceae;g__Klebsiella              | 5            | 0.01  |
| JX426119.1.1502                      | Multiplex | d__Bacteria;p__Firmicutes;c__Bacilli;o__Lactobacillales;f__Lactobacillaceae;g__Lactobacillus;s__Lactobacillus_plantarum                               | d__Bacteria;p__Firmicutes;c__Bacilli;o__Lactobacillales;f__Lactobacillaceae;g__Lactobacillus                              | 2            | 0.00  |
| EU511872.1.1384_002                  | Multiplex |                                                                                                                                                       |                                                                                                                           | 3            | 0.00  |
| HQ728217.1.150<br>0                  | Multiplex | d__Bacteria;p__Spirochaetota;c__Spirochaetia;o__Spirochaetales;f__Spirochaetaceae;g__Sphaerochaeta;s__uncultured_bacterium                            | d__Bacteria;p__Spirochaetota;c__Spirochaetia;o__Spirochaetales;f__Spirochaetaceae;g__Sphaerochaeta                        | 1            | 0.00  |
| AXLF01000003.4<br>612176.4613708_001 | Multiplex |                                                                                                                                                       |                                                                                                                           | 135.9<br>8   | 0.16  |
| AB573068.1.1481                      | Multiplex | d__Bacteria;p__Fusobacteriota;c__Fusobacteriia;o__Fusobacteriales;f__Fusobacteriaceae;g__Fusobacterium;s__Fusobacterium_nucleatum                     | d__Bacteria;p__Fusobacteriota;c__Fusobacteriia;o__Fusobacteriales;f__Fusobacteriaceae;g__Fusobacterium                    | 6            | 0.01  |
| KM819119.1.153<br>6                  | Multiplex | d__Bacteria;p__Firmicutes;c__Bacilli;o__Lactobacillales;f__Lactobacillaceae;g__Lactobacillus;s__uncultured_Bacillus                                   | d__Bacteria;p__Firmicutes;c__Bacilli;o__Lactobacillales;f__Lactobacillaceae;g__Lactobacillus                              | 1            | 0.00  |
| CP019469.23204.<br>24685             | Multiplex | d__Bacteria;p__Firmicutes;c__Clostridia;o__Peptostreptococcales-Tissierellales;f__Peptostreptococcaceae;g__Clostridioides;s__Clostridioides_difficile | d__Bacteria;p__Firmicutes;c__Clostridia;o__Peptostreptococcales-Tissierellales;f__Peptostreptococcaceae;g__Clostridioides | 3            | 0.00  |

|                      |           |                                                                                                                                                       |                                                                                                                           |       |      |
|----------------------|-----------|-------------------------------------------------------------------------------------------------------------------------------------------------------|---------------------------------------------------------------------------------------------------------------------------|-------|------|
| KX960105.1.1558      | Multiplex | d__Bacteria;p__Firmicutes;c__Bacilli;o__Lactobacillales;f__Enterococcaceae;g__Enterococcus;s__Enterococcus_faecalis                                   | d__Bacteria;p__Firmicutes;c__Bacilli;o__Lactobacillales;f__Enterococcaceae;g__Enterococcus                                | 14    | 0.02 |
| FJ975785.1.1361_001  | Multiplex |                                                                                                                                                       |                                                                                                                           | 63.96 | 0.07 |
| EF097149.1.1403_018  | Multiplex |                                                                                                                                                       |                                                                                                                           | 1.16  | 0.00 |
| AM180355.4007692.400 | Multiplex |                                                                                                                                                       |                                                                                                                           | 1     | 0.00 |
| HQ777715.1.1440      | Multiplex | d__Bacteria;p__Bacteroidota;c__Bacteroidia;o__Bacteroidales;f__Bacteroidaceae;g__Bacteroides;s__uncultured_organism                                   | d__Bacteria;p__Bacteroidota;c__Bacteroidia;o__Bacteroidales;f__Bacteroidaceae;g__Bacteroides                              | 6     | 0.01 |
| AB222700.1.1488      | Multiplex | d__Bacteria;p__Bacteroidota;c__Bacteroidia;o__Bacteroidales;f__Bacteroidaceae;g__Bacteroides;s__Bacteroides_finegoldii                                | d__Bacteria;p__Bacteroidota;c__Bacteroidia;o__Bacteroidales;f__Bacteroidaceae;g__Bacteroides                              | 3     | 0.00 |
| AB006658.1.1520      | Multiplex | d__Bacteria;p__Actinobacteriota;c__Actinobacteria;o__Bifidobacteriales;f__Bifidobacteriaceae;g__Bifidobacterium;s__Bifidobacterium_breve              | d__Bacteria;p__Actinobacteriota;c__Actinobacteria;o__Bifidobacteriales;f__Bifidobacteriaceae;g__Bifidobacterium           | 6     | 0.01 |
| EU468339.1.1395      | Multiplex | d__Bacteria;p__Firmicutes;c__Bacilli;o__Lactobacillales;f__Lactobacillaceae;g__Lactobacillus;s__uncultured_bacterium                                  | d__Bacteria;p__Firmicutes;c__Bacilli;o__Lactobacillales;f__Lactobacillaceae;g__Lactobacillus                              | 8     | 0.01 |
| AM286415.1019206.102 | Multiplex |                                                                                                                                                       |                                                                                                                           | 3     | 0.00 |
| AB616133.1.1466      | Multiplex | d__Bacteria;p__Fusobacteriota;c__Fusobacteriia;o__Fusobacteriales;f__Fusobacteriaceae;g__Fusobacterium;s__Fusobacterium_simiae                        | d__Bacteria;p__Fusobacteriota;c__Fusobacteriia;o__Fusobacteriales;f__Fusobacteriaceae;g__Fusobacterium                    | 5     | 0.01 |
| X73450.1.1470        | Multiplex | d__Bacteria;p__Firmicutes;c__Clostridia;o__Peptostreptococcales-Tissierellales;f__Peptostreptococcaceae;g__Clostridioides;s__Clostridioides_difficile | d__Bacteria;p__Firmicutes;c__Clostridia;o__Peptostreptococcales-Tissierellales;f__Peptostreptococcaceae;g__Clostridioides | 12    | 0.01 |
| CP025044.39590.41097 | Multiplex | d__Bacteria;p__Firmicutes;c__Clostridia;o__Peptostreptococcales-Tissierellales;f__Peptostreptococcaceae;g__Clostridioides;s__Clostridioides_difficile | d__Bacteria;p__Firmicutes;c__Clostridia;o__Peptostreptococcales-Tissierellales;f__Peptostreptococcaceae;g__Clostridioides | 43    | 0.05 |

|                      |           |                                                                                                                                                 |                                                                                                                         |        |      |
|----------------------|-----------|-------------------------------------------------------------------------------------------------------------------------------------------------|-------------------------------------------------------------------------------------------------------------------------|--------|------|
| EU773007.1.1247      | Multiplex | d__Bacteria;p__Actinobacteriota;c__Coriobacteriia;o__Coriobacteriales;f__Eggerthellaceae;g__Enterorhabdus;s__uncultured_bacterium               | d__Bacteria;p__Actinobacteriota;c__Coriobacteriia;o__Coriobacteriales;f__Eggerthellaceae;g__Enterorhabdus               | 8      | 0.01 |
| KF066950.1.1341      | Multiplex | d__Bacteria;p__Fusobacteriota;c__Fusobacteriia;o__Fusobacteriales;f__Fusobacteriaceae;g__Fusobacterium;s__uncultured_bacterium                  | d__Bacteria;p__Fusobacteriota;c__Fusobacteriia;o__Fusobacteriales;f__Fusobacteriaceae;g__Fusobacterium                  | 18     | 0.02 |
| EU776680.1.1401      | Multiplex | d__Bacteria;p__Proteobacteria;c__Gammaproteobacteria;o__Enterobacteriales;f__Enterobacteriaceae;g__Escherichia-Shigella;s__uncultured_bacterium | d__Bacteria;p__Proteobacteria;c__Gammaproteobacteria;o__Enterobacteriales;f__Enterobacteriaceae;g__Escherichia-Shigella | 4      | 0.00 |
| KF842515.1.1412      | Multiplex | d__Bacteria;p__Proteobacteria;c__Gammaproteobacteria;o__Enterobacteriales;f__Enterobacteriaceae;g__Escherichia-Shigella;s__uncultured_bacterium | d__Bacteria;p__Proteobacteria;c__Gammaproteobacteria;o__Enterobacteriales;f__Enterobacteriaceae;g__Escherichia-Shigella | 21     | 0.02 |
| KX057696.1.1515_002  | Multiplex |                                                                                                                                                 |                                                                                                                         | 3479.3 | 4.06 |
| HL282422.2.1545      | Multiplex | d__Bacteria;p__Fusobacteriota;c__Fusobacteriia;o__Fusobacteriales;f__Fusobacteriaceae;g__Fusobacterium;s__unidentified                          | d__Bacteria;p__Fusobacteriota;c__Fusobacteriia;o__Fusobacteriales;f__Fusobacteriaceae;g__Fusobacterium                  | 10     | 0.01 |
| AGRM01000003.578375. | Multiplex |                                                                                                                                                 |                                                                                                                         | 5      | 0.01 |
| KJ722780.1.1464      | Multiplex | d__Bacteria;p__Firmicutes;c__Bacilli;o__Lactobacillales;f__Lactobacillaceae;g__Lactobacillus;s__Lactobacillus_plantarum                         | d__Bacteria;p__Firmicutes;c__Bacilli;o__Lactobacillales;f__Lactobacillaceae;g__Lactobacillus                            | 3      | 0.00 |
| EU775673.1.1399      | Multiplex | d__Bacteria;p__Proteobacteria;c__Gammaproteobacteria;o__Enterobacteriales;f__Enterobacteriaceae;g__Escherichia-Shigella;s__uncultured_bacterium | d__Bacteria;p__Proteobacteria;c__Gammaproteobacteria;o__Enterobacteriales;f__Enterobacteriaceae;g__Escherichia-Shigella | 76     | 0.09 |
| KJ123815.1.1513_001  | Multiplex |                                                                                                                                                 |                                                                                                                         | 0.33   | 0.00 |
| AY959011.1.1496_001  | Multiplex |                                                                                                                                                 |                                                                                                                         | 0.08   | 0.00 |
| CP009787.3194722.319 | Multiplex |                                                                                                                                                 |                                                                                                                         | 2      | 0.00 |
| EU828415.1.1454      | Multiplex | d__Bacteria;p__Proteobacteria;c__Gammaproteobacteria;o__Burkholderia                                                                            | d__Bacteria;p__Proteobacteria;c__Gammaproteobacteria;o__Burkholderia                                                    | 7      | 0.01 |

|                          |           |                                                                                                                                                                |                                                                                                                                    |     |      |
|--------------------------|-----------|----------------------------------------------------------------------------------------------------------------------------------------------------------------|------------------------------------------------------------------------------------------------------------------------------------|-----|------|
|                          |           | les;f__Oxalobacteraceae;g__Janthino<br>bacterium;s__uncultured_bacterium                                                                                       | les;f__Oxalobacteraceae;g__Janthino<br>bacterium                                                                                   |     |      |
| HM557383.1.137<br>1      | Multiplex | d__Bacteria;p__Proteobacteria;c__Ga<br>mmaproteobacteria;o__Enterobacter<br>ales;f__Enterobacteriaceae;g__Entero<br>bacter;s__uncultured_bacterium             | d__Bacteria;p__Proteobacteria;c__Ga<br>mmaproteobacteria;o__Enterobacter<br>ales;f__Enterobacteriaceae;g__Entero<br>bacter         | 3   | 0.00 |
| EU778456.1.1401          | Multiplex | d__Bacteria;p__Proteobacteria;c__Ga<br>mmaproteobacteria;o__Enterobacter<br>ales;f__Enterobacteriaceae;g__Escher<br>ichia-<br>Shigella;s__uncultured_bacterium | d__Bacteria;p__Proteobacteria;c__Ga<br>mmaproteobacteria;o__Enterobacter<br>ales;f__Enterobacteriaceae;g__Escher<br>ichia-Shigella | 32  | 0.04 |
| EU560820.1.1485          | Multiplex | d__Bacteria;p__Proteobacteria;c__Ga<br>mmaproteobacteria;o__Enterobacter<br>ales;f__Enterobacteriaceae;g__Escher<br>ichia-<br>Shigella;s__uncultured_bacterium | d__Bacteria;p__Proteobacteria;c__Ga<br>mmaproteobacteria;o__Enterobacter<br>ales;f__Enterobacteriaceae;g__Escher<br>ichia-Shigella | 69  | 0.08 |
| CP019858.39376<br>14.393 | Multiplex |                                                                                                                                                                |                                                                                                                                    | 101 | 0.12 |
| KP256081.1.1512          | Multiplex | d__Bacteria;p__Firmicutes;c__Bacilli;<br>o__Lactobacillales;f__Lactobacillacea<br>e;g__Lactobacillus;s__Lactobacillus_<br>pentosus                             | d__Bacteria;p__Firmicutes;c__Bacilli;<br>o__Lactobacillales;f__Lactobacillacea<br>e;g__Lactobacillus                               | 30  | 0.04 |
| AY081984.1.1503          | Multiplex | d__Bacteria;p__Proteobacteria;c__Ga<br>mmaproteobacteria;o__Pseudomona<br>dales;f__Pseudomonadaceae;g__Pse<br>udomonas;s__uncultured_bacterium                 | d__Bacteria;p__Proteobacteria;c__Ga<br>mmaproteobacteria;o__Pseudomona<br>dales;f__Pseudomonadaceae;g__Pse<br>udomonas             | 3   | 0.00 |
| AY850535.1.1224          | Multiplex | d__Bacteria;p__Actinobacteriota;c__<br>Actinobacteria;o__Bifidobacteriales;f__<br>Bifidobacteriaceae;g__Bifidobacter<br>ium;s__uncultured_bacterium            | d__Bacteria;p__Actinobacteriota;c__<br>Actinobacteria;o__Bifidobacteriales;f__<br>Bifidobacteriaceae;g__Bifidobacter<br>ium        | 2   | 0.00 |
| HQ745182.1.143<br>4      | Multiplex | d__Bacteria;p__Bacteroidota;c__Bact<br>eroidia;o__Bacteroidales;f__Bacteroi<br>daceae;g__Bacteroides;s__unculture<br>d_organism                                | d__Bacteria;p__Bacteroidota;c__Bact<br>eroidia;o__Bacteroidales;f__Bacteroi<br>daceae;g__Bacteroides                               | 5   | 0.01 |
| JQ467938.1.1393          | Multiplex | d__Bacteria;p__Fusobacteriota;c__Fu<br>sobacteriia;o__Fusobacteriales;f__Le<br>ptotrichiaceae;g__Leptotrichia;s__un<br>cultured_bacterium                      | d__Bacteria;p__Fusobacteriota;c__Fu<br>sobacteriia;o__Fusobacteriales;f__Le<br>ptotrichiaceae;g__Leptotrichia                      | 90  | 0.11 |
| KX957774.1.1421          | Multiplex | d__Bacteria;p__Proteobacteria;c__Ga<br>mmaproteobacteria;o__Enterobacter<br>ales;f__Enterobacteriaceae;g__Entero<br>bacter;s__Enterobacter_cloacae             | d__Bacteria;p__Proteobacteria;c__Ga<br>mmaproteobacteria;o__Enterobacter<br>ales;f__Enterobacteriaceae;g__Entero<br>bacter         | 5   | 0.01 |

|                          |           |                                                                                                                               |                                                                                                        |             |       |
|--------------------------|-----------|-------------------------------------------------------------------------------------------------------------------------------|--------------------------------------------------------------------------------------------------------|-------------|-------|
| HQ790343.1.143<br>2      | Multiplex | d__Bacteria;p__Bacteroidota;c__Bacteroidia;o__Bacteroidales;f__Bacteroidaceae;g__Bacteroides;s__uncultured_organism           | d__Bacteria;p__Bacteroidota;c__Bacteroidia;o__Bacteroidales;f__Bacteroidaceae;g__Bacteroides           | 6           | 0.01  |
| DQ014744.1.133<br>8      | Multiplex | d__Bacteria;p__Firmicutes;c__Clostridia;o__Lachnospirales;f__Lachnospiraceae;g__Lachnoclostridium;s__uncultured_bacterium     | d__Bacteria;p__Firmicutes;c__Clostridia;o__Lachnospirales;f__Lachnospiraceae;g__Lachnoclostridium      | 1           | 0.00  |
| EF097675.1.1407          | Multiplex | d__Bacteria;p__Bacteroidota;c__Bacteroidia;o__Bacteroidales;f__Muribaculaceae;g__Muribaculaceae;s__uncultured_bacterium       | d__Bacteria;p__Bacteroidota;c__Bacteroidia;o__Bacteroidales;f__Muribaculaceae;g__Muribaculaceae        | 1           | 0.00  |
| HQ819022.1.143<br>9_001  | Multiplex |                                                                                                                               |                                                                                                        | 8616.<br>22 | 10.07 |
| DQ441256.1.131<br>3      | Multiplex | d__Bacteria;p__Bacteroidota;c__Bacteroidia;o__Bacteroidales;f__Rikenellaceae;g__Alistipes;s__uncultured_bacterium             | d__Bacteria;p__Bacteroidota;c__Bacteroidia;o__Bacteroidales;f__Rikenellaceae;g__Alistipes              | 7           | 0.01  |
| EU451156.1.1374<br>_009  | Multiplex |                                                                                                                               |                                                                                                        | 1           | 0.00  |
| HQ819061.1.143<br>8      | Multiplex | d__Bacteria;p__Fusobacteriota;c__Fusobacteriia;o__Fusobacteriales;f__Fusobacteriaceae;g__Fusobacterium;s__uncultured_organism | d__Bacteria;p__Fusobacteriota;c__Fusobacteriia;o__Fusobacteriales;f__Fusobacteriaceae;g__Fusobacterium | 4           | 0.00  |
| EU622695.1.1497<br>_058  | Multiplex |                                                                                                                               |                                                                                                        | 1           | 0.00  |
| JF121027.1.1363          | Multiplex | d__Bacteria;p__Proteobacteria;c__Gammaproteobacteria;o__Enterobacterales;f__Yersiniaceae;g__Serratia;s__uncultured_bacterium  | d__Bacteria;p__Proteobacteria;c__Gammaproteobacteria;o__Enterobacterales;f__Yersiniaceae;g__Serratia   | 2           | 0.00  |
| EF603126.1.1475<br>_079  | Multiplex |                                                                                                                               |                                                                                                        | 3.99        | 0.00  |
| CP009367.41955<br>09.419 | Multiplex |                                                                                                                               |                                                                                                        | 3           | 0.00  |
| EF179121.1.1461          | Multiplex | d__Bacteria;p__Proteobacteria;c__Gammaproteobacteria;o__Enterobacterales;f__Yersiniaceae;g__Yersinia;s__Yersinia_bercovieri   | d__Bacteria;p__Proteobacteria;c__Gammaproteobacteria;o__Enterobacterales;f__Yersiniaceae;g__Yersinia   | 7           | 0.01  |
| KM819129.1.152<br>8      | Multiplex | d__Bacteria;p__Firmicutes;c__Bacilli;o__Lactobacillales;f__Lactobacillaceae;g__Lactobacillus;s__uncultured_Bacillus           | d__Bacteria;p__Firmicutes;c__Bacilli;o__Lactobacillales;f__Lactobacillaceae;g__Lactobacillus           | 6           | 0.01  |



|                                  |                    |        |         |         |             |                                                  |      |  |                                                                                                                                |                                                                                                                        |        |      |
|----------------------------------|--------------------|--------|---------|---------|-------------|--------------------------------------------------|------|--|--------------------------------------------------------------------------------------------------------------------------------|------------------------------------------------------------------------------------------------------------------------|--------|------|
| DQ002385.1.1486                  |                    |        |         |         |             | Multiplex                                        |      |  | d__Bacteria;p__Proteobacteria;c__Gammaproteobacteria;o__Enterobacterales;f__Yersiniaceae;g__Serratia_serratia_marcescens       | d__Bacteria;p__Proteobacteria;c__Gammaproteobacteria;o__Enterobacterales;f__Yersiniaceae;g__Serratia                   | 2      | 0.00 |
| EU778438.1.1420                  |                    |        |         |         |             | Multiplex                                        |      |  | d__Bacteria;p__Firmicutes;c__Bacilli;o__Lactobacillales;f__Enterococcaceae;g__Enterococcus;s__uncultured_bacterium             | d__Bacteria;p__Firmicutes;c__Bacilli;o__Lactobacillales;f__Enterococcaceae;g__Enterococcus                             | 7      | 0.01 |
| CP010888.654100.6556             |                    |        |         |         |             | Multiplex                                        |      |  |                                                                                                                                |                                                                                                                        | 66     | 0.08 |
| HQ819061.1.1438_001              |                    |        |         |         |             | Multiplex                                        |      |  |                                                                                                                                |                                                                                                                        | 10.78  | 0.01 |
| EF406402.1.1499_010              |                    |        |         |         |             | Multiplex                                        |      |  |                                                                                                                                |                                                                                                                        | 0.02   | 0.00 |
| HQ810939.1.1381                  |                    |        |         |         |             | Multiplex                                        |      |  | d__Bacteria;p__Bacteroidota;c__Bacteroidia;o__Bacteroidales;f__Bacteroidaceae;g__Bacteroides;s__uncultured_organism            | d__Bacteria;p__Bacteroidota;c__Bacteroidia;o__Bacteroidales;f__Bacteroidaceae;g__Bacteroides                           | 8      | 0.01 |
| EU560876.1.1492                  |                    |        |         |         |             | Multiplex                                        |      |  | d__Bacteria;p__Firmicutes;c__Bacilli;o__Lactobacillales;f__Enterococcaceae;g__Enterococcus;s__uncultured_bacterium             | d__Bacteria;p__Firmicutes;c__Bacilli;o__Lactobacillales;f__Enterococcaceae;g__Enterococcus                             | 9      | 0.01 |
| CDQP01001253.198.170             |                    |        |         |         |             | Multiplex                                        |      |  |                                                                                                                                |                                                                                                                        | 5      | 0.01 |
| KC936918.1.1479                  |                    |        |         |         |             | Multiplex                                        |      |  | d__Bacteria;p__Fusobacteriota;c__Fusobacteriia;o__Fusobacteriales;f__Fusobacteriaceae;g__Fusobacterium;s__uncultured_bacterium | d__Bacteria;p__Fusobacteriota;c__Fusobacteriia;o__Fusobacteriales;f__Fusobacteriaceae;g__Fusobacterium                 | 3      | 0.00 |
| EU778438.1.1420_005              |                    |        |         |         |             | Multiplex                                        |      |  |                                                                                                                                |                                                                                                                        | 103.82 | 0.12 |
| HQ800646.1.1455                  |                    |        |         |         |             | Multiplex                                        |      |  | d__Bacteria;p__Bacteroidota;c__Bacteroidia;o__Bacteroidales;f__Bacteroidaceae;g__Bacteroides;s__uncultured_organism            | d__Bacteria;p__Bacteroidota;c__Bacteroidia;o__Bacteroidales;f__Bacteroidaceae;g__Bacteroides                           | 1      | 0.00 |
| 09a8fa70427aa68f16934c729b826071 | 1eb3021faaec49c2_1 | 99.454 | 3660889 | 3659426 | Full-length | Escherichia_coli_ATCC_700926                     | True |  |                                                                                                                                | d__Bacteria;p__Proteobacteria;c__Gammaproteobacteria;o__Enterobacterales;f__Enterobacteriaceae;g__Escherichia-Shigella | 308    | 0.99 |
| 4bec1cb362f10c0518dae936b3032c6f | 38ad2dab3e5e43b7_1 | 99.932 | 627724  | 629197  | Full-length | Staphylococcus_aureus_subsp_aureus_ATCC_BAA_1556 | True |  |                                                                                                                                | d__Bacteria;p__Firmicutes;c__Bacilli;o__Staphylococcales;f__Staphylococcaceae;g__Staphylococcus                        | 224    | 0.72 |

|                                   |                    |        |         |         |             |                                                   |      |                                                                                                                                         |                                                                                                                        |      |      |
|-----------------------------------|--------------------|--------|---------|---------|-------------|---------------------------------------------------|------|-----------------------------------------------------------------------------------------------------------------------------------------|------------------------------------------------------------------------------------------------------------------------|------|------|
| 51d51e872348c3c5e3b70be7f91c4a32  | 071a82bb90b94c6f_1 | 100    | 494810  | 496268  | Full-length | Acinetobacter_baumannii_ATC_C_17978               | True | d__Bacteria;p__Proteobacteria;c__Gammaproteobacteria;o__Pseudomonadales;f__Moraxellaceae;g__Acinetobacter;s__Acinetobacter_baumannii    | d__Bacteria;p__Proteobacteria;c__Gammaproteobacteria;o__Pseudomonadales;f__Moraxellaceae;g__Acinetobacter              | 2360 | 7.60 |
| cd1af128eb857acddeb168e57245021ec | 38ad2dab3e5e43b7_1 | 99.796 | 627724  | 629197  | Full-length | Staphylococcus_aureus_subsp__aureus_ATCC_BAA_1556 | True |                                                                                                                                         | d__Bacteria;p__Firmicutes;c__Bacilli;o__Staphylococcales;f__Staphylococcaceae;g__Staphylococcus                        | 212  | 0.68 |
| d5ebbbf0f104adc463156fca557bb6fc  |                    |        |         |         | Full-length |                                                   |      | d__Bacteria;p__Verrucomicrobiota;c__Verrucomicrobiae;o__Verrucomicrobiales;f__Akkermansiaceae;g__Akkermansia;s__Akkermansia_muciniphila | d__Bacteria;p__Verrucomicrobiota;c__Verrucomicrobiae;o__Verrucomicrobiales;f__Akkermansiaceae;g__Akkermansia           | 12   | 0.04 |
| 7983269916ac14fd4655f0a0c60f8694  | 9dc637a985b042c4_1 | 100    | 605244  | 606690  | Full-length | Cutibacterium_acnes_ATCC_11828                    | True |                                                                                                                                         | d__Bacteria;p__Actinobacteriota;c__Actinobacteria;o__Propionibacteriales;f__Propionibacteriaceae;g__Cutibacterium      | 958  | 3.08 |
| d8a3399acd76da73c1b2b8a3683a7540  |                    |        |         |         | Full-length |                                                   |      |                                                                                                                                         | d__Bacteria;p__Cyanobacteria;c__Cyanobacteriia;o__Chloroplast;f__Chloroplast;g__Chloroplast                            | 24   | 0.08 |
| c0089458dae2c0559162e58eb2661873  | 1eb3021faaec49c2_1 | 100    | 454995  | 456458  | Full-length | Escherichia_coli_ATCC_700926                      | True |                                                                                                                                         | d__Bacteria;p__Proteobacteria;c__Gammaproteobacteria;o__Enterobacterales;f__Enterobacteriaceae;g__Escherichia-Shigella | 281  | 0.90 |
| a0530711bdec8d611872863731f96dde  | adb6d513b7374f84_1 | 100    | 16704   | 18182   | Full-length | Streptococcus_mutans_ATCC_700610                  | True | d__Bacteria;p__Firmicutes;c__Bacilli;o__Lactobacillales;f__Streptococcaceae;g__Streptococcus;s__Streptococcus_mutans                    | d__Bacteria;p__Firmicutes;c__Bacilli;o__Lactobacillales;f__Streptococcaceae;g__Streptococcus                           | 1293 | 4.16 |
| 994cb47a2b400e6185743e1765244faf  | 38ad2dab3e5e43b7_1 | 99.932 | 627724  | 629197  | Full-length | Staphylococcus_aureus_subsp__aureus_ATCC_BAA_1556 | True |                                                                                                                                         | d__Bacteria;p__Firmicutes;c__Bacilli;o__Staphylococcales;f__Staphylococcaceae;g__Staphylococcus                        | 214  | 0.69 |
| 13bc41e35faa4f40a01de5a972c0c4ac  | 1eb3021faaec49c2_1 | 100    | 3660889 | 3659426 | Full-length | Escherichia_coli_ATCC_700926                      | True |                                                                                                                                         | d__Bacteria;p__Proteobacteria;c__Gammaproteobacteria;o__Enterobacterales;f__Enterobacteriaceae;g__Escherichia-Shigella | 611  | 1.97 |
| 9fc4609d84db9e441de7db46d7172ae4  | 1eb3021faaec49c2_1 | 100    | 1152600 | 1154063 | Full-length | Escherichia_coli_ATCC_700926                      | True |                                                                                                                                         | d__Bacteria;p__Proteobacteria;c__Gammaproteobacteria;o__Enterobacterales;f__Enterobacteriaceae;g__Escherichia-Shigella | 256  | 0.82 |

|                                  |                    |        |         |         |             |                                       |      |                                                                                                                                       |                                                                                                                        |      |      |
|----------------------------------|--------------------|--------|---------|---------|-------------|---------------------------------------|------|---------------------------------------------------------------------------------------------------------------------------------------|------------------------------------------------------------------------------------------------------------------------|------|------|
| 0bf3e0641c88ec588bc66b567c3fa63d | 1eb3021faaec49c2_1 | 99.932 | 3660889 | 3659426 | Full-length | Escherichia_coli_ATCC_700926          | True |                                                                                                                                       | d__Bacteria;p__Proteobacteria;c__Gammaproteobacteria;o__Enterobacterales;f__Enterobacteriaceae;g__Escherichia-Shigella | 285  | 0.92 |
| 9eda36e35469eb0ba4b8045fa7acabd0 | d889f9dd971b473d_1 | 99.862 | 2587739 | 2589188 | Full-length | Phocaeicola_vulgatus_ATCC_8482        | True | d__Bacteria;p__Bacteroidota;c__Bacteroidia;o__Bacteroidales;f__Bacteroidaceae;g__Bacteroides;s__Bacteroides_vulgatus                  | d__Bacteria;p__Bacteroidota;c__Bacteroidia;o__Bacteroidales;f__Bacteroidaceae;g__Bacteroides                           | 274  | 0.88 |
| 339aac7377a0d948a52bc0b2bf3dfda8 | d889f9dd971b473d_1 | 100    | 2095461 | 2096910 | Full-length | Phocaeicola_vulgatus_ATCC_8482        | True | d__Bacteria;p__Bacteroidota;c__Bacteroidia;o__Bacteroidales;f__Bacteroidaceae;g__Bacteroides;s__Bacteroides_vulgatus                  | d__Bacteria;p__Bacteroidota;c__Bacteroidia;o__Bacteroidales;f__Bacteroidaceae;g__Bacteroides                           | 350  | 1.13 |
| e7b11bfbee47d834b64203b6c1294201 | 3042186b85304e8d_1 | 99.93  | 2256227 | 2257660 | Full-length | Clostridium_beijerinckii_ATCC_35702   | True | d__Bacteria;p__Firmicutes;c__Clostridia;o__Clostridiales;f__Clostridiaceae;g__Clostridium_sensu_stricto_1;s__Clostridium_beijerinckii | d__Bacteria;p__Firmicutes;c__Clostridia;o__Clostridiales;f__Clostridiaceae;g__Clostridium_sensu_stricto_1              | 153  | 0.49 |
| 2f66c5bd318dfac1e9738ffd54ca88b8 | 3042186b85304e8d_1 | 100    | 5769886 | 5768453 | Full-length | Clostridium_beijerinckii_ATCC_35702   | True | d__Bacteria;p__Firmicutes;c__Clostridia;o__Clostridiales;f__Clostridiaceae;g__Clostridium_sensu_stricto_1;s__Clostridium_beijerinckii | d__Bacteria;p__Firmicutes;c__Clostridia;o__Clostridiales;f__Clostridiaceae;g__Clostridium_sensu_stricto_1              | 304  | 0.98 |
| a0ec2668157ffb2374ece8cad58ecc5f | 285a115d88c043f1_1 | 100    | 678369  | 679826  | Full-length | Pseudomonas_aeruginosa_ATCC_9027      | True | d__Bacteria;p__Proteobacteria;c__Gammaproteobacteria;o__Pseudomonadales;f__Pseudomonadaceae;g__Pseudomonas;s__Pseudomonas_aeruginosa  | d__Bacteria;p__Proteobacteria;c__Gammaproteobacteria;o__Pseudomonadales;f__Pseudomonadaceae;g__Pseudomonas             | 630  | 2.03 |
| 0ed2d53fd823b2ef922b6f349cade1cd | 045df7c7cb0f42b5_1 | 100    | 1223511 | 1222049 | Full-length | Neisseria_meningitidis_ATCC_BAA_335   | True | d__Bacteria;p__Proteobacteria;c__Gammaproteobacteria;o__Burkholderiales;f__Neisseriaceae;g__Neisseria;s__Neisseria_meningitidis       | d__Bacteria;p__Proteobacteria;c__Gammaproteobacteria;o__Burkholderiales;f__Neisseriaceae;g__Neisseria                  | 2291 | 7.37 |
| 7dcace79bc8188077e07b0085aa57b7f | 5371a9904eb64361_1 | 100    | 8928    | 10400   | Full-length | Bacillus_pacificus_ATCC_10987         | True |                                                                                                                                       | d__Bacteria;p__Firmicutes;c__Bacillio__Bacillales;f__Bacillaceae;g__Bacillus                                           | 496  | 1.60 |
| aab4d379026eb5e6a7e2b32ec4c715e7 | f5bcb58692924cb7_1 | 99.796 | 1722262 | 1720790 | Full-length | Staphylococcus_epidermidis_ATCC_12228 | True |                                                                                                                                       | d__Bacteria;p__Firmicutes;c__Bacillio__Staphylococcales;f__Staphylococcaceae;g__Staphylococcus                         | 307  | 0.99 |
| efe5e4e4ba300f45c88da09e3e9cd3e4 | 285a115d88c043f1_1 | 100    | 5383111 | 5381654 | Full-length | Pseudomonas_aeruginosa_ATCC_9027      | True | d__Bacteria;p__Proteobacteria;c__Gammaproteobacteria;o__Pseudomonadales;f__Pseudomonadaceae;g__Pseudomonas;s__Pseudomonas_aeruginosa  | d__Bacteria;p__Proteobacteria;c__Gammaproteobacteria;o__Pseudomonadales;f__Pseudomonadaceae;g__Pseudomonas             | 216  | 0.70 |

|                                  |                            |        |             |             |             |                                      |      |                                                                                                                                       |                                                                                                               |      |      |
|----------------------------------|----------------------------|--------|-------------|-------------|-------------|--------------------------------------|------|---------------------------------------------------------------------------------------------------------------------------------------|---------------------------------------------------------------------------------------------------------------|------|------|
| ad20976e0e8c7e5adcb7f11b5fcf7830 | d889f9d<br>d971b47<br>3d_1 | 99.862 | 44319<br>43 | 44304<br>94 | Full-length | Phocaeicola_vulgatus_ATCC_8482       | True | d__Bacteria;p__Bacteroidota;c__Bacteroidia;o__Bacteroidales;f__Bacteroidaceae;g__Bacteroides;s__Bacteroides_vulgatus                  | d__Bacteria;p__Bacteroidota;c__Bacteroidia;o__Bacteroidales;f__Bacteroidaceae;g__Bacteroides                  | 271  | 0.87 |
| d5cb708aa8b5ddc54ca7e0528124fe20 | 2b7fa0e<br>1de5f42<br>de_1 | 100    | 25624<br>88 | 25610<br>65 | Full-length | Deinococcus_radiodurans_ATCC_BAA_816 | True | d__Bacteria;p__Deinococcota;c__Deinococci;o__Deinococcales;f__Deinococcaceae;g__Deinococcus;s__Deinococcus_radiodurans                | d__Bacteria;p__Deinococcota;c__Deinococci;o__Deinococcales;f__Deinococcaceae;g__Deinococcus                   | 374  | 1.20 |
| 34b695df3f78278d604299f2c4adc80c | 2b7fa0e<br>1de5f42<br>de_1 | 100    | 18254<br>8  | 18397<br>1  | Full-length | Deinococcus_radiodurans_ATCC_BAA_816 | True | d__Bacteria;p__Deinococcota;c__Deinococci;o__Deinococcales;f__Deinococcaceae;g__Deinococcus;s__Deinococcus_radiodurans                | d__Bacteria;p__Deinococcota;c__Deinococci;o__Deinococcales;f__Deinococcaceae;g__Deinococcus                   | 1031 | 3.32 |
| 3feab8f97f15836d17829bc4ea074162 | 3042186<br>b85304e<br>8d_1 | 99.93  | 44587<br>4  | 44730<br>7  | Full-length | Clostridium_beijerinckii_ATCC_35702  | True | d__Bacteria;p__Firmicutes;c__Clostridia;o__Clostridiales;f__Clostridiaceae;g__Clostridium_sensu_stricto_1;s__Clostridium_beijerinckii | d__Bacteria;p__Firmicutes;c__Clostridia;o__Clostridiales;f__Clostridiaceae;g__Clostridium_sensu_stricto_1     | 175  | 0.56 |
| b2ef16dee036f7ce8b9b74a7234111c1 | 3042186<br>b85304e<br>8d_1 | 99.861 | 34048<br>22 | 34033<br>89 | Full-length | Clostridium_beijerinckii_ATCC_35702  | True | d__Bacteria;p__Firmicutes;c__Clostridia;o__Clostridiales;f__Clostridiaceae;g__Clostridium_sensu_stricto_1;s__Clostridium_beijerinckii | d__Bacteria;p__Firmicutes;c__Clostridia;o__Clostridiales;f__Clostridiaceae;g__Clostridium_sensu_stricto_1     | 144  | 0.46 |
| 9f3938b0148e6fa857077444480b6fd3 | d889f9d<br>d971b47<br>3d_1 | 99.724 | 47446<br>05 | 47431<br>56 | Full-length | Phocaeicola_vulgatus_ATCC_8482       | True | d__Bacteria;p__Bacteroidota;c__Bacteroidia;o__Bacteroidales;f__Bacteroidaceae;g__Bacteroides;s__Bacteroides_vulgatus                  | d__Bacteria;p__Bacteroidota;c__Bacteroidia;o__Bacteroidales;f__Bacteroidaceae;g__Bacteroides                  | 257  | 0.83 |
| aaf82c612373bafcef3509b72ee24809 | 3042186<br>b85304e<br>8d_1 | 99.93  | 57698<br>86 | 57684<br>53 | Full-length | Clostridium_beijerinckii_ATCC_35702  | True | d__Bacteria;p__Firmicutes;c__Clostridia;o__Clostridiales;f__Clostridiaceae;g__Clostridium_sensu_stricto_1;s__Clostridium_beijerinckii | d__Bacteria;p__Firmicutes;c__Clostridia;o__Clostridiales;f__Clostridiaceae;g__Clostridium_sensu_stricto_1     | 194  | 0.62 |
| 61de72098cbf9f693f09c863d1c5a586 | 2504aeb<br>524e74d<br>25_1 | 100    | 22933<br>8  | 23079<br>1  | Full-length | Porphyromonas_gingivalis_ATCC_33277  | True | d__Bacteria;p__Bacteroidota;c__Bacteroidia;o__Bacteroidales;f__Porphyromonadaceae;g__Porphyromonas;s__Porphyromonas_gingivalis        | d__Bacteria;p__Bacteroidota;c__Bacteroidia;o__Bacteroidales;f__Porphyromonadaceae;g__Porphyromonas            | 2925 | 9.41 |
| a8f0a9703e902a87d6be02364e684c50 | 3042186<br>b85304e<br>8d_1 | 100    | 57758<br>23 | 57743<br>90 | Full-length | Clostridium_beijerinckii_ATCC_35702  | True | d__Bacteria;p__Firmicutes;c__Clostridia;o__Clostridiales;f__Clostridiaceae;g__Clostridium_sensu_stricto_1;s__Clostridium_beijerinckii | d__Bacteria;p__Firmicutes;c__Clostridia;o__Clostridiales;f__Clostridiaceae;g__Clostridium_sensu_stricto_1     | 215  | 0.69 |
| 913abfe7ecfd10c4eb54ea1dea67f07c | 4762fdd<br>8950949<br>39_1 | 100    | 96390       | 97815       | Full-length | Helicobacter_pylori_ATCC_700392      | True | d__Bacteria;p__Campilobacterota;c__Campylobacteria;o__Campylobacteriales;f__Helicobacteraceae;g__Helicobacter;s__Helicobacter_pylori  | d__Bacteria;p__Campilobacterota;c__Campylobacteria;o__Campylobacteriales;f__Helicobacteraceae;g__Helicobacter | 1125 | 3.62 |

|                                  |                    |        |         |         |             |                                         |      |                                                                                                                                                 |                                                                                                                 |      |      |
|----------------------------------|--------------------|--------|---------|---------|-------------|-----------------------------------------|------|-------------------------------------------------------------------------------------------------------------------------------------------------|-----------------------------------------------------------------------------------------------------------------|------|------|
| b56b7466c84c7ca53aa71e4ce25f61b0 | c45a1c57adf4460e_2 | 100    | 23119   | 24570   | Full-length | Bifidobacterium_adolescentis_ATCC_15703 | True | d__Bacteria;p__Actinobacteriota;c__Actinobacteria;o__Bifidobacteriales;f__Bifidobacteriaceae;g__Bifidobacterium;s__Bifidobacterium_adolescentis | d__Bacteria;p__Actinobacteriota;c__Actinobacteria;o__Bifidobacteriales;f__Bifidobacteriaceae;g__Bifidobacterium | 447  | 1.44 |
| 0ccaf57fc10e3ca943b9911e91c05de1 | 3042186b85304e8d_1 | 100    | 2267882 | 2269315 | Full-length | Clostridium_beijerinckii_ATCC_35702     | True | d__Bacteria;p__Firmicutes;c__Clostridia;o__Clostridiales;f__Clostridiaceae;g__Clostridium_sensu_stricto_1;s__Clostridium_beijerinckii           | d__Bacteria;p__Firmicutes;c__Clostridia;o__Clostridiales;f__Clostridiaceae;g__Clostridium_sensu_stricto_1       | 170  | 0.55 |
| d669559001b98da82874fac6581afc1c | 3042186b85304e8d_1 | 100    | 4548532 | 4547099 | Full-length | Clostridium_beijerinckii_ATCC_35702     | True | d__Bacteria;p__Firmicutes;c__Clostridia;o__Clostridiales;f__Clostridiaceae;g__Clostridium_sensu_stricto_1;s__Clostridium_beijerinckii           | d__Bacteria;p__Firmicutes;c__Clostridia;o__Clostridiales;f__Clostridiaceae;g__Clostridium_sensu_stricto_1       | 171  | 0.55 |
| 21b49156bf40185385c31d7db91a5ad5 | 5371a9904eb64361_1 | 100    | 325854  | 327326  | Full-length | Bacillus_pacificus_ATCC_10987           | True |                                                                                                                                                 | d__Bacteria;p__Firmicutes;c__Bacilli;o__Bacillales;f__Bacillaceae;g__Bacillus                                   | 62   | 0.20 |
| 56fa3c3172361f91fadde5f221e6f5b4 | c45a1c57adf4460e_2 | 99.243 | 23119   | 24570   | Full-length | Bifidobacterium_adolescentis_ATCC_15703 | True | d__Bacteria;p__Actinobacteriota;c__Actinobacteria;o__Bifidobacteriales;f__Bifidobacteriaceae;g__Bifidobacterium;s__Bifidobacterium_adolescentis | d__Bacteria;p__Actinobacteriota;c__Actinobacteria;o__Bifidobacteriales;f__Bifidobacteriaceae;g__Bifidobacterium | 119  | 0.38 |
| 26cfdb2bcbd3a64a84e9b237d94a97eb | 27b35dd1651e48dd_1 | 100    | 213391  | 214873  | Full-length | Enterococcus_faecalis_ATCC_47077        | True | d__Bacteria;p__Firmicutes;c__Bacilli;o__Lactobacillales;f__Enterococcaceae;g__Enterococcus;s__Enterococcus_faecalis                             | d__Bacteria;p__Firmicutes;c__Bacilli;o__Lactobacillales;f__Enterococcaceae;g__Enterococcus                      | 738  | 2.38 |
| 07b2978940b50886f3866b04b7f982cf | 58ae911973b74ffc_1 | 100    | 16330   | 17800   | Full-length | Streptococcus_agalactiae_ATCC_BAA_611   | True | d__Bacteria;p__Firmicutes;c__Bacilli;o__Lactobacillales;f__Streptococcaceae;g__Streptococcus;s__Streptococcus_agalactiae                        | d__Bacteria;p__Firmicutes;c__Bacilli;o__Lactobacillales;f__Streptococcaceae;g__Streptococcus                    | 2250 | 7.24 |
| 7932226c8cd025d2ea117b03d48f63e8 | 3042186b85304e8d_1 | 99.93  | 9364    | 10797   | Full-length | Clostridium_beijerinckii_ATCC_35702     | True | d__Bacteria;p__Firmicutes;c__Clostridia;o__Clostridiales;f__Clostridiaceae;g__Clostridium_sensu_stricto_1;s__Clostridium_beijerinckii           | d__Bacteria;p__Firmicutes;c__Clostridia;o__Clostridiales;f__Clostridiaceae;g__Clostridium_sensu_stricto_1       | 190  | 0.61 |
| 34babcf1732962962d2fbbbadf3af637 | f5bcb58692924cb7_1 | 100    | 1597980 | 1596508 | Full-length | Staphylococcus_epidermidis_ATCC_12228   | True |                                                                                                                                                 | d__Bacteria;p__Firmicutes;c__Bacilli;o__Staphylococcales;f__Staphylococcaceae;g__Staphylococcus                 | 190  | 0.61 |
| a7e2262894c30111bfd4daee5736414f | f5bcb58692924cb7_1 | 99.932 | 1597980 | 1596508 | Full-length | Staphylococcus_epidermidis_             | True |                                                                                                                                                 | d__Bacteria;p__Firmicutes;c__Bacilli;o__Staphylococcales;f__Staphylococcaceae;g__Staphylococcus                 | 37   | 0.12 |

|                                   |                        |        |             |             |             |                                         |      |                                                                                                                                                 |                                                                                                                 |      |      |
|-----------------------------------|------------------------|--------|-------------|-------------|-------------|-----------------------------------------|------|-------------------------------------------------------------------------------------------------------------------------------------------------|-----------------------------------------------------------------------------------------------------------------|------|------|
| ATCC_12228                        |                        |        |             |             |             |                                         |      |                                                                                                                                                 |                                                                                                                 |      |      |
| 3cc006600b219858ac3c647f2613a32a  | d889f9d<br>d971b473d_1 | 99.931 | 34820<br>8  | 34675<br>9  | Full-length | Phocaeicola_vulgatus_ATCC_8482          | True | d__Bacteria;p__Bacteroidota;c__Bacteroidia;o__Bacteroidales;f__Bacteroidaceae;g__Bacteroides;s__Bacteroides_vulgatus                            | d__Bacteria;p__Bacteroidota;c__Bacteroidia;o__Bacteroidales;f__Bacteroidaceae;g__Bacteroides                    | 568  | 1.83 |
| f3cfb383dcfb753cad226072f6665784  | f5bcb58<br>692924cb7_1 | 100    | 23359<br>12 | 23344<br>40 | Full-length | Staphylococcus_epidermidis_ATCC_12228   | True |                                                                                                                                                 | d__Bacteria;p__Firmicutes;c__Bacilli;o__Staphylococcales;f__Staphylococcaceae;g__Staphylococcus                 | 648  | 2.09 |
| dd586a1ae04ed2d129d944286ae71f61  | f5bcb58<br>692924cb7_1 | 100    | 17222<br>62 | 17207<br>90 | Full-length | Staphylococcus_epidermidis_ATCC_12228   | True |                                                                                                                                                 | d__Bacteria;p__Firmicutes;c__Bacilli;o__Staphylococcales;f__Staphylococcaceae;g__Staphylococcus                 | 410  | 1.32 |
| a5ebdb1225c13ba7cfd2467533fc6da6  | c45a1c5<br>7adf4460e_1 | 100    | 18501<br>47 | 18486<br>99 | Full-length | Bifidobacterium_adolescentis_ATCC_15703 | True | d__Bacteria;p__Actinobacteriota;c__Actinobacteria;o__Bifidobacteriales;f__Bifidobacteriaceae;g__Bifidobacterium;s__Bifidobacterium_adolescentis | d__Bacteria;p__Actinobacteriota;c__Actinobacteria;o__Bifidobacteriales;f__Bifidobacteriaceae;g__Bifidobacterium | 110  | 0.35 |
| 8348a732f75c6a0439af2ebffbacc5ff1 | 3042186<br>b85304e8d_1 | 99.861 | 20309<br>91 | 20324<br>24 | Full-length | Clostridium_beijerinckii_ATCC_35702     | True | d__Bacteria;p__Firmicutes;c__Clostridia;o__Clostridiales;f__Clostridiaceae;g__Clostridium_sensu_stricto_1;s__Clostridium_beijerinckii           | d__Bacteria;p__Firmicutes;c__Clostridia;o__Clostridiales;f__Clostridiaceae;g__Clostridium_sensu_stricto_1       | 140  | 0.45 |
| 4c67b666ce2da2054aec0ba50dd1e494  | d889f9d<br>d971b473d_1 | 99.931 | 20954<br>61 | 20969<br>10 | Full-length | Phocaeicola_vulgatus_ATCC_8482          | True | d__Bacteria;p__Bacteroidota;c__Bacteroidia;o__Bacteroidales;f__Bacteroidaceae;g__Bacteroides;s__Bacteroides_vulgatus                            | d__Bacteria;p__Bacteroidota;c__Bacteroidia;o__Bacteroidales;f__Bacteroidaceae;g__Bacteroides                    | 78   | 0.25 |
| fce86ef2355971d83413788cbb660531  | 5964adb<br>8d0df4fde_1 | 100    | 47747<br>0  | 47896<br>4  | Full-length | Lactobacillus_gasseri_ATCC_33323        | True | d__Bacteria;p__Firmicutes;c__Bacilli;o__Lactobacillales;f__Lactobacillaceae;g__Lactobacillus;s__Lactobacillus_gasseri                           | d__Bacteria;p__Firmicutes;c__Bacilli;o__Lactobacillales;f__Lactobacillaceae;g__Lactobacillus                    | 2102 | 6.77 |
| 04d3de55f475a0888205c9507901a096  | 89e35fec<br>14744942_1 | 100    | 52833<br>2  | 52979<br>4  | Full-length | Schaalia_odontolytica_ATCC_17982        | True | d__Bacteria;p__Actinobacteriota;c__Actinobacteria;o__Actinomycetales;f__Actinomycetaceae;g__Actinomycetes;s__Schaalia_odontolytica              | d__Bacteria;p__Actinobacteriota;c__Actinobacteria;o__Actinomycetales;f__Actinomycetaceae;g__Actinomycetes       | 112  | 0.36 |
| 021408f68ac3d943f7e16261373b2a61  | 3042186<br>b85304e8d_1 | 99.93  | 92466<br>0  | 92609<br>3  | Full-length | Clostridium_beijerinckii_ATCC_35702     | True | d__Bacteria;p__Firmicutes;c__Clostridia;o__Clostridiales;f__Clostridiaceae;g__Clostridium_sensu_stricto_1;s__Clostridium_beijerinckii           | d__Bacteria;p__Firmicutes;c__Clostridia;o__Clostridiales;f__Clostridiaceae;g__Clostridium_sensu_stricto_1       | 164  | 0.53 |
| bc7d5e82dae59e2e5e8321bb5c5eae4b  | adb6d5<br>13b7374f84_1 | 100    | 16601<br>54 | 16586<br>76 | Full-length | Streptococcus_muta                      | True | d__Bacteria;p__Firmicutes;c__Bacilli;o__Lactobacillales;f__Streptococcaceae;g__Streptococcus                                                    | d__Bacteria;p__Firmicutes;c__Bacilli;o__Lactobacillales;f__Streptococcaceae;g__Streptococcus                    | 903  | 2.91 |

|                                  |                    |        |         |         |             |                                                   |      |                                                                                                                                       |                                                                                                                        |          |      |
|----------------------------------|--------------------|--------|---------|---------|-------------|---------------------------------------------------|------|---------------------------------------------------------------------------------------------------------------------------------------|------------------------------------------------------------------------------------------------------------------------|----------|------|
|                                  |                    |        |         |         |             | ns_ATCC_700610                                    |      | ae;g__Streptococcus;s__Streptococcus_mutans                                                                                           |                                                                                                                        |          |      |
| 1f1158dbb4126e5a7f04094b61700493 | 3042186b85304e8d_1 | 100    | 142194  | 143627  | Full-length | Clostridium_beijerinckii_ATCC_35702               | True | d__Bacteria;p__Firmicutes;c__Clostridia;o__Clostridiales;f__Clostridiaceae;g__Clostridium_sensu_stricto_1;s__Clostridium_beijerinckii | d__Bacteria;p__Firmicutes;c__Clostridia;o__Clostridiales;f__Clostridiaceae;g__Clostridium_sensu_stricto_1              | 292      | 0.94 |
| 985d4a0d4d7e7d255af6a92044ae5901 | 38ad2dab3e5e43b7_1 | 99.932 | 627724  | 629197  | Full-length | Staphylococcus_aureus_subsp__aureus_ATCC_BAA_1556 | True |                                                                                                                                       | d__Bacteria;p__Firmicutes;c__Bacilli;o__Staphylococcales;f__Staphylococaceae;g__Staphylococcus                         | 233      | 0.75 |
| 92bcc461c3dbfbeb88759ada02f95a6b | 5371a9904eb64361_1 | 100    | 616926  | 618398  | Full-length | Bacillus_pacificus_ATCC_10987                     | True |                                                                                                                                       | d__Bacteria;p__Firmicutes;c__Bacilli;o__Bacillales;f__Bacillaceae;g__Bacillus                                          | 54       | 0.17 |
| 27be187284317979c93fd2218ee3722e | 38ad2dab3e5e43b7_1 | 100    | 627724  | 629197  | Full-length | Staphylococcus_aureus_subsp__aureus_ATCC_BAA_1556 | True |                                                                                                                                       | d__Bacteria;p__Firmicutes;c__Bacilli;o__Staphylococcales;f__Staphylococaceae;g__Staphylococcus                         | 467      | 1.50 |
| b80a1bd6b19379171cafb03a4ddb26a3 | 266a835027f7464b_2 | 100    | 38523   | 37135   | Full-length | Rhodobacter_sphaeroides_ATCC_17029                | True | d__Bacteria;p__Proteobacteria;c__Alphaproteobacteria;o__Rhodobacterales;f__Rhodobacteraceae;g__Rhodobacter;s__Rhodobacter_sphaeroides | d__Bacteria;p__Proteobacteria;c__Alphaproteobacteria;o__Rhodobacterales;f__Rhodobacteraceae;g__Rhodobacter             | 488      | 1.57 |
| 3b44c0cd22f7eeac2386b9f2d475930a | 1eb3021faaec49c2_1 | 100    | 4584392 | 4582929 | Full-length | Escherichia_coli_ATCC_700926                      | True |                                                                                                                                       | d__Bacteria;p__Proteobacteria;c__Gammaproteobacteria;o__Enterobacterales;f__Enterobacteriaceae;g__Escherichia-Shigella | 311      | 1.00 |
| d3eab112b21cbea371f808f940fa4b0c | f5bcb58692924cb7_1 | 99.796 | 1722262 | 1720790 | Full-length | Staphylococcus_epidermidis_ATCC_12228             | True |                                                                                                                                       | d__Bacteria;p__Firmicutes;c__Bacilli;o__Staphylococcales;f__Staphylococaceae;g__Staphylococcus                         | 231      | 0.74 |
| 37d8a0129a66dba216a600739d34631  | 3042186b85304e8d_1 | 100    | 5743540 | 5742107 | Full-length | Clostridium_beijerinckii_ATCC_35702               | True | d__Bacteria;p__Firmicutes;c__Clostridia;o__Clostridiales;f__Clostridiaceae;g__Clostridium_sensu_stricto_1;s__Clostridium_beijerinckii | d__Bacteria;p__Firmicutes;c__Clostridia;o__Clostridiales;f__Clostridiaceae;g__Clostridium_sensu_stricto_1              | 1.83E+02 | 0.59 |
| 7809550a0f7794b926ffcebad7542089 | 3042186b85304e8d_1 | 99.861 | 3404822 | 3403389 | Full-length | Clostridium_beijerinckii_ATCC_35702               | True | d__Bacteria;p__Firmicutes;c__Clostridia;o__Clostridiales;f__Clostridiaceae;g__Clostridium_sensu_stricto_1;s__Clostridium_beijerinckii | d__Bacteria;p__Firmicutes;c__Clostridia;o__Clostridiales;f__Clostridiaceae;g__Clostridium_sensu_stricto_1              | 222      | 0.71 |

|                                          |                            |       |             |             |             |                                         |      |                                                                                                                                       |                                                                                                           |          |      |
|------------------------------------------|----------------------------|-------|-------------|-------------|-------------|-----------------------------------------|------|---------------------------------------------------------------------------------------------------------------------------------------|-----------------------------------------------------------------------------------------------------------|----------|------|
| 070e52443d30c5<br>d9e99c8cb06412<br>db1a | 3042186<br>b85304e<br>8d_1 | 99.93 | 59394<br>87 | 59380<br>54 | Full-length | Clostridium_beijerinckii_ATC<br>C_35702 | True | d__Bacteria;p__Firmicutes;c__Clostridia;o__Clostridiales;f__Clostridiaceae;g__Clostridium_sensu_stricto_1;s__Clostridium_beijerinckii | d__Bacteria;p__Firmicutes;c__Clostridia;o__Clostridiales;f__Clostridiaceae;g__Clostridium_sensu_stricto_1 | 2.11E+02 | 0.68 |
|------------------------------------------|----------------------------|-------|-------------|-------------|-------------|-----------------------------------------|------|---------------------------------------------------------------------------------------------------------------------------------------|-----------------------------------------------------------------------------------------------------------|----------|------|
