# Supplementary material for: Amplicon-Based Microbiome Profiling: From Second- to Third-Generation Sequencing for Higher Taxonomic Resolution
Source: MDPI journal article supplement (doi:10.3390/genes14081567), 2023-07-31
Supplement: s1 [file s1]

**Supplementary Figure S1: Correlation between the expected and observed relative abundances (%) of reads mapping on 16S rRNA genes of the mock species.** (a) Correlation for the V3V4 region; (b) correlation for the V5V6 region; (c) correlation for the V4 region; (d) correlation for the multiplex approach; (e) correlation for preliminary ASVs of the multiplex approach; (f) correlation for the full-length approach. For each method, the adjusted R<sup>2</sup>, linear model coefficient (coef.), Pearson correlation coefficient (r) and p-value are shown.

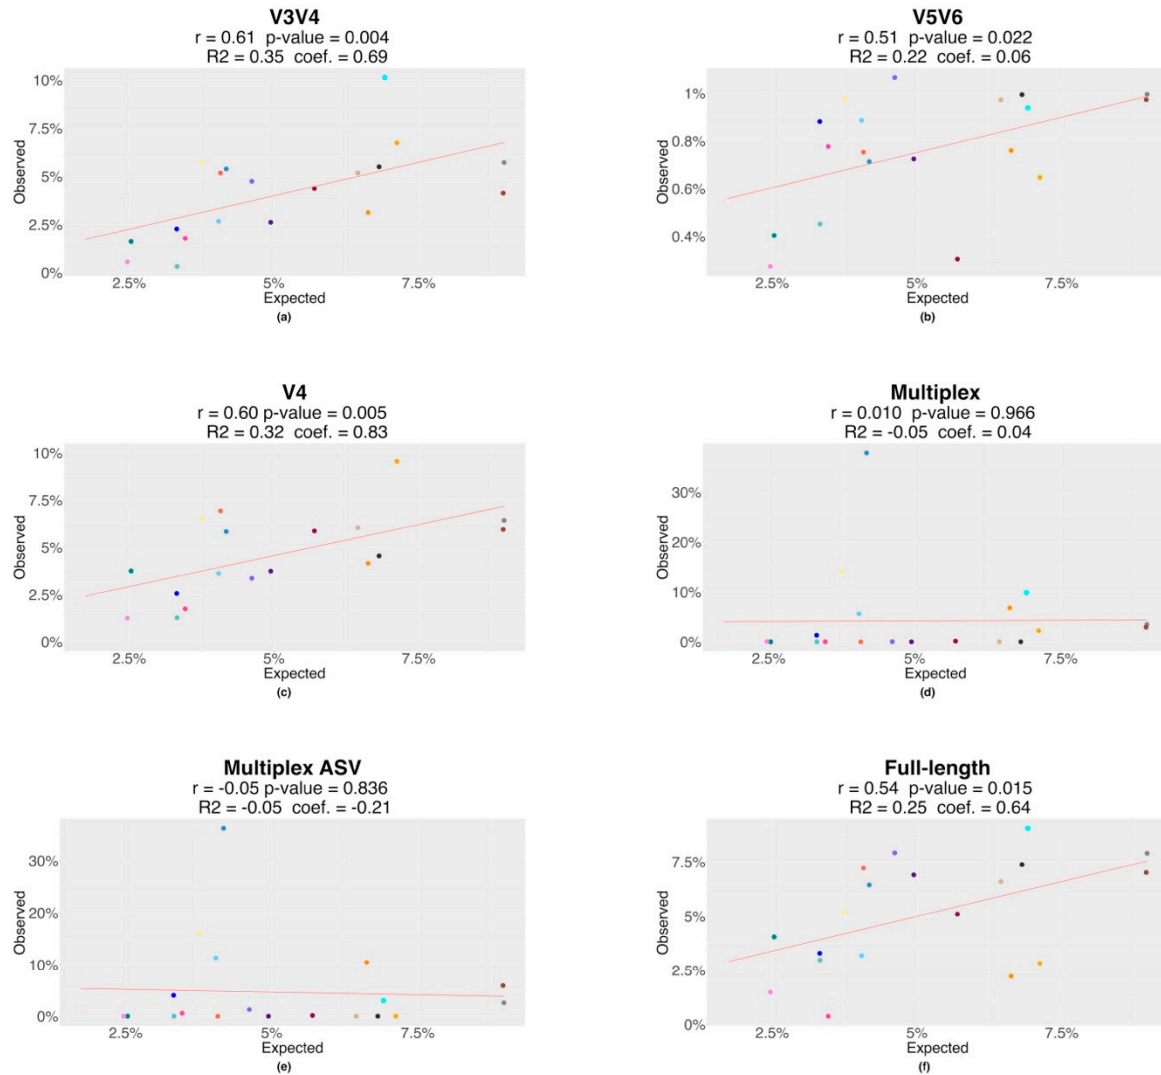

### Species

- |                                       |                                     |
|---------------------------------------|-------------------------------------|
| • <i>Acinetobacter baumannii</i>      | • <i>Lactobacillus gasseri</i>      |
| • <i>Bacillus pacificus</i>           | • <i>Neisseria meningitidis</i>     |
| • <i>Bacteroides vulgatus</i>         | • <i>Porphyromonas gingivalis</i>   |
| • <i>Bifidobacterium adolescentis</i> | • <i>Pseudomonas aeruginosa</i>     |
| • <i>Clostridium beijerinckii</i>     | • <i>Rhodobacter sphaeroides</i>    |
| • <i>Cutibacterium acnes</i>          | • <i>Schaalia odontolytica</i>      |
| • <i>Deinococcus radiodurans</i>      | • <i>Staphylococcus aureus</i>      |
| • <i>Enterococcus faecalis</i>        | • <i>Staphylococcus epidermidis</i> |
| • <i>Escherichia coli</i>             | • <i>Streptococcus agalactiae</i>   |
| • <i>Helicobacter pylori</i>          | • <i>Streptococcus mutans</i>       |
