# Supplementary material for: Amplicon-Based Microbiome Profiling: From Second- to Third-Generation Sequencing for Higher Taxonomic Resolution
Source: MDPI journal article supplement (doi:10.3390/genes14081567), 2023-07-31
Supplement: s1 [file s1]

**Supplementary Table S1: Taxonomic composition and genomic characteristics of the Mock ATCC 20 Strain Even Mix (MSA-1002TM, ATCC®, USA).** Per each strain, the species and the genus scientific name, the number of 16S rRNA gene copies and the genome size are listed. Complete genome and annotation are available at ATCC genome browser (<https://www.atcc.org/products/msa-1002>).

| Phylum           | Species                             | 16S copies | Genome (bp) |
|------------------|-------------------------------------|------------|-------------|
| Proteobacteria   | <i>Acinetobacter baumannii</i>      | 6          | 4,075,779   |
| Firmicutes       | <i>Bacillus pacificus</i>           | 14         | 5,442,819   |
| Bacteroidota     | <i>Bacteroides vulgatus</i>         | 7          | 5,163,177   |
| Actinobacteriota | <i>Bifidobacterium adolescentis</i> | 5          | 2,089,630   |
| Firmicutes       | <i>Clostridium beijerinckii</i>     | 15         | 6,007,460   |
| Actinobacteriota | <i>Cutibacterium acnes</i>          | 3          | 2,497,484   |
| Deinococcota     | <i>Deinococcus radiodurans</i>      | 3          | 3,280,465   |
| Firmicutes       | <i>Enterococcus faecalis</i>        | 4          | 2,738,556   |
| Proteobacteria   | <i>Escherichia coli</i>             | 7          | 4,642,497   |
| Proteobacteria   | <i>Helicobacter pylori</i>          | 2          | 1,667,794   |
| Firmicutes       | <i>Lactobacillus gasseri</i>        | 6          | 1,854,273   |
| Proteobacteria   | <i>Neisseria meningitidis</i>       | 4          | 2,240,102   |
| Bacteroidota     | <i>Porphyromonas gingivalis</i>     | 4          | 2,399,479   |
| Proteobacteria   | <i>Pseudomonas aeruginosa</i>       | 4          | 6,374,461   |
| Proteobacteria   | <i>Rhodobacter sphaeroides</i>      | 4          | 4,488,518   |
| Actinobacteriota | <i>Schaalia odontolytica</i>        | 3          | 2,396,044   |
| Firmicutes       | <i>Staphylococcus aureus</i>        | 6          | 2,915,427   |
| Firmicutes       | <i>Staphylococcus epidermidis</i>   | 6          | 2,575,951   |
| Firmicutes       | <i>Streptococcus agalactiae</i>     | 7          | 2,159,783   |
| Firmicutes       | <i>Streptococcus mutans</i>         | 5          | 2,031,444   |
